# Supplementary material for: Transcriptome Profiling Analysis of the Testis After Eyestalk Ablation for Selection of the Candidate Genes Involved in the Male Sexual Development in Macrobrachium nipponense
Source: Front Genet. 2021 May 31;12:675928. doi: 10.3389/fgene.2021.675928 (PMC8202825; doi:10.3389/fgene.2021.675928)
Supplement: Supplementary Table 1 — Summary of BLASTx results for unigenes of testis M. nipponense transcriptome. [file Table_1.XLS]

#GeneID	Database_ID	E_value	Identity	Score	Annotation
TRINITY_DN10001_c0_g1_i1_6	XP_015919168.2	1.2e-10	34/73(46.58)	73	nuclear receptor subfamily 1 group D member 1 [Parasteatoda tepidariorum]
TRINITY_DN10012_c0_g2_i1_1	XP_019550217.1	6.9e-35	79/105(75.24)	154	PREDICTED: putative transcription factor SOX-15 [Aedes albopictus]
TRINITY_DN10018_c0_g1_i1_6	XP_018024436.1	6.7e-12	44/136(32.35)	77	PREDICTED: uncharacterized protein LOC108680175 [Hyalella azteca]
TRINITY_DN10018_c0_g2_i1_6	XP_018024436.1	9.3e-09	30/89(33.71)	67	PREDICTED: uncharacterized protein LOC108680175 [Hyalella azteca]
TRINITY_DN10018_c0_g3_i1_6	XP_018024436.1	3.1e-28	60/130(46.15)	132	PREDICTED: uncharacterized protein LOC108680175 [Hyalella azteca]
TRINITY_DN10019_c0_g1_i1_6	XP_018016043.1	2.7e-23	50/103(48.54)	115	PREDICTED: leucine-rich repeat-containing protein 4-like [Hyalella azteca]
TRINITY_DN10024_c0_g1_i1_6	XP_023604321.1	5.9e-20	45/69(65.22)	104	tigger transposable element-derived protein 1-like [Myotis lucifugus]
TRINITY_DN10026_c0_g1_i1_8	XP_018013905.1	1.6e-60	115/197(58.38)	240	PREDICTED: teneurin-a-like [Hyalella azteca]
TRINITY_DN10032_c0_g1_i1_1	XP_019217765.1	6.9e-09	36/60(60.00)	68	tigger transposable element-derived protein 1-like [Oreochromis niloticus]
TRINITY_DN10035_c0_g1_i1_3	XP_009921627.1	4.5e-22	50/68(73.53)	112	PREDICTED: glycine-rich RNA-binding protein GRP1A-like, partial [Haliaeetus albicilla]
TRINITY_DN10035_c0_g2_i1_3	XP_009921627.1	4.6e-22	50/68(73.53)	112	PREDICTED: glycine-rich RNA-binding protein GRP1A-like, partial [Haliaeetus albicilla]
TRINITY_DN10036_c0_g1_i1_7	XP_018570674.1	3.3e-22	46/84(54.76)	112	uncharacterized protein LOC108910537 [Anoplophora glabripennis]
TRINITY_DN10037_c0_g1_i1_2	OWF50541.1	3.9e-25	68/160(42.50)	122	Kinesin-like protein KIF27 [Mizuhopecten yessoensis]
TRINITY_DN10060_c0_g1_i1_6	XP_018021145.1	3.6e-50	93/159(58.49)	205	PREDICTED: glucose dehydrogenase [FAD, quinone]-like [Hyalella azteca]
TRINITY_DN10075_c0_g1_i1_4	XP_018007685.1	6.2e-61	129/292(44.18)	241	PREDICTED: peptidyl-prolyl cis-trans isomerase FKBP9-like [Hyalella azteca]
TRINITY_DN1007_c0_g1_i1_3	AGV15457.1	6.3e-95	163/224(72.77)	354	PIWI-3 [Portunus trituberculatus]
TRINITY_DN10097_c0_g1_i1_1	XP_019623190.1	1.6e-45	93/143(65.03)	189	PREDICTED: ribokinase-like isoform X1 [Branchiostoma belcheri]
TRINITY_DN10097_c0_g1_i1_2	XP_022917916.1	3.4e-35	83/146(56.85)	156	NADH dehydrogenase [ubiquinone] 1 beta subcomplex subunit 11, mitochondrial [Onthophagus taurus]
TRINITY_DN10097_c0_g1_i1_8	XP_018015412.1	1.6e-38	80/177(45.20)	166	PREDICTED: organic cation transporter protein-like [Hyalella azteca]
TRINITY_DN10101_c0_g1_i1_6	RDD46243.1	1.8e-25	60/65(92.31)	122	40S ribosomal protein S28 [Trichoplax sp. H2]
TRINITY_DN10104_c0_g1_i1_7	Q9GV46.1	2.0e-54	124/349(35.53)	220	RecName: Full=Oplophorus-luciferin 2-monooxygenase non-catalytic subunit; Flags: Precursor
TRINITY_DN10110_c0_g1_i2_7	XP_018023991.1	1.6e-62	118/126(93.65)	247	PREDICTED: longitudinals lacking protein-like [Hyalella azteca]
TRINITY_DN10119_c0_g1_i1_1	XP_018025878.1	1.2e-06	31/108(28.70)	60	PREDICTED: uncharacterized protein LOC108681373 [Hyalella azteca]
TRINITY_DN10128_c0_g1_i1_3	XP_018022143.1	1.8e-102	181/287(63.07)	380	PREDICTED: NAD-dependent protein deacylase Sirt4-like [Hyalella azteca]
TRINITY_DN10140_c0_g1_i1_6	XP_018015789.1	1.3e-33	74/146(50.68)	150	PREDICTED: transmembrane protein 138-like [Hyalella azteca]
TRINITY_DN10141_c0_g1_i1_5	EFX87080.1	3.2e-147	393/611(64.32)	530	hypothetical protein DAPPUDRAFT_312603 [Daphnia pulex]
TRINITY_DN10149_c0_g1_i1_6	XP_018020087.1	2.8e-07	28/70(40.00)	62	PREDICTED: uncharacterized protein LOC108676516 [Hyalella azteca]
TRINITY_DN10157_c0_g1_i1_2	SJL87348.1	1.9e-58	103/133(77.44)	233	unnamed protein product, partial [Vector pCAT1]
TRINITY_DN10161_c0_g1_i1_5	XP_018014065.1	3.2e-06	30/99(30.30)	58	PREDICTED: uncharacterized protein LOC108671097 [Hyalella azteca]
TRINITY_DN10162_c0_g1_i1_6	XP_018024986.1	1.0e-57	117/204(57.35)	230	PREDICTED: Down syndrome cell adhesion molecule-like protein 1 homolog, partial [Hyalella azteca]
TRINITY_DN10162_c0_g2_i1_6	XP_018010327.1	8.5e-23	57/131(43.51)	114	PREDICTED: Down syndrome cell adhesion molecule-like protein Dscam2 [Hyalella azteca]
TRINITY_DN10165_c0_g1_i1_6	APC26117.1	6.9e-39	73/137(53.28)	167	metabotropic glutamate receptor type 3 [Homarus americanus]
TRINITY_DN10169_c0_g1_i1_8	XP_018012712.1	2.0e-55	101/114(88.60)	222	PREDICTED: voltage-gated potassium channel subunit beta-2-like isoform X1 [Hyalella azteca]
TRINITY_DN10177_c0_g1_i1_7	XP_015923579.1	2.1e-120	210/389(53.98)	440	glycoprotein-N-acetylgalactosamine 3-beta-galactosyltransferase 1 [Parasteatoda tepidariorum]
TRINITY_DN10198_c0_g1_i1_7	XP_011294500.1	1.6e-75	158/217(72.81)	290	PREDICTED: kinesin heavy chain [Musca domestica]
TRINITY_DN10201_c0_g1_i1_2	EAL61190.1	6.3e-15	60/176(34.09)	91	RNA-binding region RNP-1 domain-containing protein [Dictyostelium discoideum AX4]
TRINITY_DN10202_c0_g1_i1_4	XP_021379630.1	5.6e-07	36/104(34.62)	61	uncharacterized protein LOC110467064 [Mizuhopecten yessoensis]
TRINITY_DN10203_c0_g1_i1_8	XP_022235154.1	8.2e-69	130/273(47.62)	268	calcitonin gene-related peptide type 1 receptor-like isoform X1 [Limulus polyphemus]
TRINITY_DN10218_c0_g1_i2_8	XP_018026249.1	2.4e-65	120/142(84.51)	256	PREDICTED: 60S ribosomal protein L11-like [Hyalella azteca]
TRINITY_DN10219_c0_g1_i1_6	PIK56379.1	1.8e-14	36/54(66.67)	86	hypothetical protein BSL78_06753 [Apostichopus japonicus]
TRINITY_DN10221_c0_g1_i1_3	KZS20137.1	3.7e-52	126/265(47.55)	213	Retinol dehydrogenase 14 [Daphnia magna]
TRINITY_DN10224_c0_g1_i1_3	XP_003703268.1	4.0e-30	123/442(27.83)	140	PREDICTED: uncharacterized protein LOC100878449 [Megachile rotundata]
TRINITY_DN10225_c0_g1_i1_5	XP_018020861.1	4.3e-81	226/549(41.17)	310	PREDICTED: sex determination protein fruitless-like isoform X2 [Hyalella azteca]
TRINITY_DN10226_c0_g1_i1_3	PNF39070.1	2.1e-50	106/216(49.07)	206	hypothetical protein B7P43_G04343 [Cryptotermes secundus]
TRINITY_DN10228_c0_g1_i1_3	AVD29926.1	9.1e-130	285/483(59.01)	471	dorsocross [Parhyale hawaiensis]
TRINITY_DN1022_c1_g1_i1_4	XP_017945894.1	6.8e-24	61/150(40.67)	117	PREDICTED: uncharacterized protein LOC105945867, partial [Xenopus tropicalis]
TRINITY_DN10237_c0_g1_i2_5	ACR54142.1	3.1e-17	43/44(97.73)	95	ribosomal protein rps21 [Palaemon varians]
TRINITY_DN10248_c0_g1_i1_2	XP_013392392.1	4.3e-34	103/366(28.14)	153	procollagen-lysine,2-oxoglutarate 5-dioxygenase 1 isoform X3 [Lingula anatina]
TRINITY_DN10251_c0_g1_i1_2	AWK57537.1	2.0e-20	54/80(67.50)	106	pigment dispersing hormone 1 [Cherax quadricarinatus]
TRINITY_DN10251_c0_g1_i1_6	XP_018015914.1	3.1e-16	44/104(42.31)	92	PREDICTED: uncharacterized protein LOC108672708 [Hyalella azteca]
TRINITY_DN10252_c0_g2_i1_5	XP_023713113.1	2.7e-10	42/133(31.58)	72	multidrug resistance-associated protein 5-like isoform X4 [Cryptotermes secundus]
TRINITY_DN10256_c0_g1_i1_4	BAK23962.1	3.6e-92	164/175(93.71)	345	ribulose-1,5-bisphosphate carboxylase/oxygenase small subunit [synthetic construct]
TRINITY_DN10257_c0_g1_i1_2	ELT97206.1	2.2e-21	55/121(45.45)	109	hypothetical protein CAPTEDRAFT_196093 [Capitella teleta]
TRINITY_DN10260_c0_g1_i1_5	XP_023369312.1	8.9e-09	41/88(46.59)	68	uncharacterized protein LOC100959373 [Otolemur garnettii]
TRINITY_DN10267_c0_g1_i1_6	XP_021913191.1	1.5e-42	102/254(40.16)	180	kinesin-like protein KIF19 isoform X1 [Zootermopsis nevadensis]
TRINITY_DN10269_c0_g1_i1_2	XP_018007678.1	8.4e-103	210/306(68.63)	382	PREDICTED: negative elongation factor E-like [Hyalella azteca]
TRINITY_DN10274_c0_g1_i1_6	XP_018022650.1	7.4e-49	92/140(65.71)	200	PREDICTED: fatty acyl-CoA reductase 1-like [Hyalella azteca]
TRINITY_DN10274_c0_g2_i1_6	PNF17416.1	5.2e-28	57/120(47.50)	131	putative fatty acyl-CoA reductase CG5065 [Cryptotermes secundus]
TRINITY_DN10282_c0_g1_i1_2	XP_013774329.1	7.7e-36	87/195(44.62)	157	tyrosine kinase receptor Cad96Ca-like isoform X1 [Limulus polyphemus]
TRINITY_DN10285_c0_g1_i1_6	XP_018020319.1	8.2e-08	33/77(42.86)	63	PREDICTED: uncharacterized protein LOC108676703 isoform X1 [Hyalella azteca]
TRINITY_DN10288_c0_g1_i1_4	XP_018010986.1	2.5e-33	74/154(48.05)	150	PREDICTED: uncharacterized protein LOC108668307 [Hyalella azteca]
TRINITY_DN10290_c0_g1_i1_6	XP_014662789.1	2.4e-15	38/59(64.41)	89	PREDICTED: uncharacterized protein K02A2.6-like [Priapulus caudatus]
TRINITY_DN10297_c0_g1_i1_4	XP_018012483.1	1.9e-06	34/88(38.64)	60	PREDICTED: uncharacterized protein LOC108669616 [Hyalella azteca]
TRINITY_DN10298_c0_g1_i1_3	XP_018007640.1	6.4e-15	39/68(57.35)	89	PREDICTED: broad-complex core protein isoforms 1/2/3/4/5-like [Hyalella azteca]
TRINITY_DN10306_c0_g1_i1_2	EFX80981.1	1.7e-34	75/104(72.12)	152	hypothetical protein DAPPUDRAFT_50627 [Daphnia pulex]
TRINITY_DN10317_c0_g1_i1_5	KII72172.1	2.2e-07	41/101(40.59)	62	Transposon Ty3-G Gag-Pol polyprotein [Thelohanellus kitauei]
TRINITY_DN10323_c0_g1_i1_8	XP_018016428.1	2.5e-135	262/491(53.36)	490	PREDICTED: RING finger protein 145-like [Hyalella azteca]
TRINITY_DN10325_c0_g1_i2_2	XP_018019422.1	2.9e-51	115/169(68.05)	210	PREDICTED: protein spire-like [Hyalella azteca]
TRINITY_DN10326_c0_g1_i2_3	AEB54646.1	3.7e-73	137/153(89.54)	282	ribosomal protein S11 [Procambarus clarkii]
TRINITY_DN10329_c0_g2_i1_3	XP_020900624.1	3.0e-07	25/37(67.57)	63	fibulin-1-like [Exaiptasia pallida]
TRINITY_DN10329_c0_g3_i1_3	OUC49977.1	2.3e-07	22/35(62.86)	62	putative calcium binding EGF domain protein [Trichinella nativa]
TRINITY_DN10333_c0_g1_i1_4	APU54663.1	1.6e-52	98/150(65.33)	213	thioester-containing protein 1 [Penaeus vannamei]
TRINITY_DN10333_c0_g2_i1_4	APU54663.1	9.7e-44	90/109(82.57)	183	thioester-containing protein 1 [Penaeus vannamei]
TRINITY_DN10337_c0_g1_i1_6	XP_018020287.1	7.7e-13	73/252(28.97)	82	PREDICTED: uncharacterized protein LOC108676679 [Hyalella azteca]
TRINITY_DN10339_c0_g2_i1_4	XP_022083887.1	2.0e-06	62/87(71.26)	62	zinc finger protein SNAI2-like [Acanthaster planci]
TRINITY_DN1033_c0_g1_i1_5	XP_011562859.1	1.1e-39	74/101(73.27)	170	PREDICTED: autophagy protein 12-like [Plutella xylostella]
TRINITY_DN10355_c0_g1_i1_6	XP_018011841.1	7.1e-12	40/94(42.55)	77	PREDICTED: LOW QUALITY PROTEIN: leukocyte tyrosine kinase receptor-like [Hyalella azteca]
TRINITY_DN10355_c0_g2_i1_6	KZS15911.1	1.6e-38	73/142(51.41)	166	ALK tyrosine kinase receptor [Daphnia magna]
TRINITY_DN10356_c0_g1_i1_6	AJC52502.1	1.0e-49	108/251(43.03)	204	estrogen sulfotransferase [Scylla olivacea]
TRINITY_DN10360_c0_g1_i1_6	XP_018021953.1	5.8e-61	122/255(47.84)	241	PREDICTED: TM2 domain-containing protein 3-like isoform X1 [Hyalella azteca]
TRINITY_DN10361_c0_g1_i2_5	XP_018026635.1	7.0e-91	156/221(70.59)	340	PREDICTED: uncharacterized protein LOC108682041 [Hyalella azteca]
TRINITY_DN10367_c0_g1_i1_3	XP_022239409.1	2.4e-136	272/527(51.61)	493	serine/threonine-protein kinase Sgk2-like [Limulus polyphemus]
TRINITY_DN10375_c0_g1_i2_6	XP_018011792.1	3.5e-06	24/34(70.59)	59	PREDICTED: transmembrane protein 164-like [Hyalella azteca]
TRINITY_DN10383_c0_g1_i1_8	XP_018028172.1	5.5e-34	62/112(55.36)	151	PREDICTED: sushi, von Willebrand factor type A, EGF and pentraxin domain-containing protein 1-like [Hyalella azteca]
TRINITY_DN10389_c0_g1_i1_5	BAC82590.1	5.0e-25	75/215(34.88)	122	reverse transcriptase [Ciona intestinalis]
TRINITY_DN10390_c0_g1_i1_3	AEB54656.1	3.6e-60	115/216(53.24)	239	glutathione S transferase D1 [Procambarus clarkii]
TRINITY_DN10395_c0_g2_i1_3	XP_018008759.1	3.3e-21	92/265(34.72)	109	PREDICTED: zinc finger protein castor homolog 1-like isoform X1 [Hyalella azteca]
TRINITY_DN10399_c0_g1_i1_3	XP_018007126.1	2.6e-32	104/352(29.55)	147	PREDICTED: transient receptor potential channel pyrexia-like [Hyalella azteca]
TRINITY_DN10401_c0_g1_i1_6	XP_018016724.1	2.4e-18	49/141(34.75)	100	PREDICTED: protein FAM69A-like [Hyalella azteca]
TRINITY_DN10401_c0_g2_i1_6	XP_018016724.1	9.5e-30	64/142(45.07)	137	PREDICTED: protein FAM69A-like [Hyalella azteca]
TRINITY_DN10407_c0_g1_i1_6	XP_018027075.1	5.3e-34	80/111(72.07)	151	PREDICTED: transient receptor potential cation channel subfamily A member 1-like [Hyalella azteca]
TRINITY_DN10408_c0_g1_i1_6	ACR48137.1	4.4e-67	127/130(97.69)	261	ribosomal protein S24 [Rimicaris exoculata]
TRINITY_DN10409_c0_g1_i1_3	XP_018011459.1	5.5e-68	137/247(55.47)	266	PREDICTED: zinc finger protein 521-like [Hyalella azteca]
TRINITY_DN1040_c0_g1_i1_5	XP_018006824.1	1.1e-42	83/108(76.85)	179	PREDICTED: putative ammonium transporter 3 [Hyalella azteca]
TRINITY_DN10416_c0_g1_i1_5	XP_018024681.1	9.4e-11	37/63(58.73)	75	PREDICTED: uncharacterized protein LOC108680383 [Hyalella azteca]
TRINITY_DN10424_c0_g1_i1_5	XP_018021113.1	1.6e-24	54/101(53.47)	119	PREDICTED: CUB and sushi domain-containing protein 1-like, partial [Hyalella azteca]
TRINITY_DN10425_c0_g1_i2_4	XP_022248410.1	1.1e-57	123/219(56.16)	231	protein CLEC16A-like isoform X1 [Limulus polyphemus]
TRINITY_DN1042_c0_g1_i3_7	XP_015917742.1	1.3e-08	27/51(52.94)	66	zinc finger protein OZF-like [Parasteatoda tepidariorum]
TRINITY_DN10434_c0_g1_i1_3	XP_018013453.1	1.2e-20	49/91(53.85)	107	PREDICTED: lachesin-like [Hyalella azteca]
TRINITY_DN10436_c0_g2_i1_4	XP_023342074.1	3.1e-15	54/117(46.15)	89	cuticle protein 7-like [Eurytemora affinis]
TRINITY_DN10438_c0_g1_i1_5	XP_013856405.1	3.2e-10	37/80(46.25)	72	PREDICTED: uncharacterized protein LOC106512295, partial [Austrofundulus limnaeus]
TRINITY_DN10441_c0_g1_i1_2	XP_018020705.1	1.3e-26	88/239(36.82)	127	PREDICTED: uncharacterized protein LOC108677065 [Hyalella azteca]
TRINITY_DN10444_c0_g1_i1_2	AMD09631.1	3.3e-99	166/185(89.73)	368	glutamine synthetase [Penaeus monodon]
TRINITY_DN10447_c0_g1_i1_5	XP_025413971.1	3.0e-10	48/171(28.07)	72	leucine-rich PPR motif-containing protein, mitochondrial [Sipha flava]
TRINITY_DN10453_c0_g1_i1_2	XP_018025685.1	8.7e-20	54/142(38.03)	104	PREDICTED: uncharacterized protein LOC108681191 [Hyalella azteca]
TRINITY_DN10457_c0_g1_i1_3	XP_018027669.1	4.9e-37	92/242(38.02)	162	PREDICTED: uncharacterized protein LOC108682923 [Hyalella azteca]
TRINITY_DN10459_c0_g1_i1_5	PFX26877.1	2.8e-16	43/68(63.24)	92	hypothetical protein AWC38_SpisGene8468 [Stylophora pistillata]
TRINITY_DN10467_c0_g1_i1_8	XP_019576811.1	4.8e-57	109/117(93.16)	227	PREDICTED: 5-methyltetrahydropteroyltriglutamate--homocysteine methyltransferase 1, partial [Rhinolophus sinicus]
TRINITY_DN10473_c0_g1_i1_6	AXR98486.1	5.4e-73	126/209(60.29)	281	glutathione S-transferase theta, partial [Procambarus clarkii]
TRINITY_DN10487_c0_g2_i1_6	XP_005094546.1	3.8e-07	31/68(45.59)	62	PREDICTED: uncharacterized protein LOC101856725 [Aplysia californica]
TRINITY_DN1048_c0_g1_i1_2	XP_017769656.1	4.0e-96	176/365(48.22)	359	PREDICTED: acyl-CoA:lysophosphatidylglycerol acyltransferase 1-like [Nicrophorus vespilloides]
TRINITY_DN10496_c0_g1_i2_6	EFX64533.1	1.2e-112	200/219(91.32)	414	hypothetical protein DAPPUDRAFT_304534 [Daphnia pulex]
TRINITY_DN10500_c0_g1_i1_6	XP_021935059.1	3.5e-53	108/187(57.75)	217	uncharacterized protein LOC110837353 isoform X1 [Zootermopsis nevadensis]
TRINITY_DN10501_c0_g1_i1_1	CCW43203.1	7.6e-10	42/132(31.82)	70	serine proteinase [Scylla paramamosain]
TRINITY_DN10509_c0_g1_i1_6	XP_022900105.1	5.2e-21	44/64(68.75)	107	putative nuclease HARBI1 [Onthophagus taurus]
TRINITY_DN10511_c0_g1_i1_6	XP_022288541.1	4.2e-11	33/48(68.75)	76	uncharacterized protein LOC111100741 [Crassostrea virginica]
TRINITY_DN10519_c0_g1_i1_5	XP_019874785.1	3.9e-18	58/129(44.96)	99	PREDICTED: LOW QUALITY PROTEIN: hormone-sensitive lipase [Aethina tumida]
TRINITY_DN10528_c0_g1_i1_6	PIK51299.1	6.6e-60	114/218(52.29)	238	hypothetical protein BSL78_11819 [Apostichopus japonicus]
TRINITY_DN10531_c0_g1_i1_6	ADK27312.1	6.6e-23	56/148(37.84)	115	C-type lectin [Procambarus clarkii]
TRINITY_DN10540_c0_g1_i1_6	XP_011429759.1	2.2e-95	215/485(44.33)	357	PREDICTED: short transient receptor potential channel 4-associated protein isoform X3 [Crassostrea gigas]
TRINITY_DN10548_c0_g1_i1_5	XP_023712308.1	1.3e-47	91/154(59.09)	197	protein tyrosine phosphatase domain-containing protein 1-like isoform X2 [Cryptotermes secundus]
TRINITY_DN1054_c0_g1_i1_5	XP_018022816.1	8.1e-131	224/365(61.37)	474	PREDICTED: anoctamin-10-like [Hyalella azteca]
TRINITY_DN10552_c0_g1_i1_7	PNF41481.1	5.6e-98	201/366(54.92)	365	Endophilin-B1 [Cryptotermes secundus]
TRINITY_DN10556_c0_g1_i1_5	XP_013778413.1	9.9e-13	42/69(60.87)	80	serine/arginine-rich splicing factor 2-like [Limulus polyphemus]
TRINITY_DN10557_c0_g1_i1_8	KZS15671.1	6.4e-33	72/119(60.50)	147	Pickpocket 9 [Daphnia magna]
TRINITY_DN10558_c0_g1_i2_2	XP_022160391.1	7.9e-22	87/298(29.19)	112	uncharacterized protein LOC111026599 [Myzus persicae]
TRINITY_DN10562_c0_g2_i1_5	EEB13246.1	1.1e-25	63/115(54.78)	123	Disheveled-associated activator of morphogenesis, putative [Pediculus humanus corporis]
TRINITY_DN10563_c0_g1_i1_4	CEM04838.1	2.3e-24	64/108(59.26)	119	unnamed protein product [Vitrella brassicaformis CCMP3155]
TRINITY_DN10565_c0_g1_i1_1	XP_015760854.1	9.8e-24	67/153(43.79)	117	PREDICTED: uncharacterized protein LOC107340016 [Acropora digitifera]
TRINITY_DN10568_c0_g1_i1_3	KZS20137.1	2.9e-52	125/321(38.94)	213	Retinol dehydrogenase 14 [Daphnia magna]
TRINITY_DN10572_c0_g1_i1_7	XP_018011066.1	6.8e-71	126/210(60.00)	274	PREDICTED: frizzled-2-like [Hyalella azteca]
TRINITY_DN10572_c0_g1_i1_8	XP_018007640.1	2.0e-34	69/119(57.98)	153	PREDICTED: broad-complex core protein isoforms 1/2/3/4/5-like [Hyalella azteca]
TRINITY_DN10579_c0_g1_i1_3	XP_018023562.1	5.0e-58	120/244(49.18)	232	PREDICTED: hemK methyltransferase family member 1-like, partial [Hyalella azteca]
TRINITY_DN10582_c0_g1_i1_6	XP_018011252.1	9.8e-17	34/55(61.82)	93	PREDICTED: uncharacterized protein LOC108668528 [Hyalella azteca]
TRINITY_DN10595_c0_g1_i1_5	EPB76641.1	7.3e-11	47/131(35.88)	74	Pao retrotransposon peptidase [Ancylostoma ceylanicum]
TRINITY_DN10595_c0_g1_i1_6	XP_018019213.1	5.5e-08	38/119(31.93)	64	PREDICTED: glutamate receptor ionotropic, kainate 5-like [Hyalella azteca]
TRINITY_DN10624_c0_g1_i1_6	XP_026243016.1	3.0e-32	76/99(76.77)	145	homeobox protein OTX1 isoform X2 [Urocitellus parryii]
TRINITY_DN10633_c0_g2_i1_7	PSN46812.1	4.1e-23	52/101(51.49)	115	hypothetical protein C0J52_11193 [Blattella germanica]
TRINITY_DN10637_c0_g1_i1_3	XP_018016224.1	2.9e-13	54/121(44.63)	83	PREDICTED: uncharacterized protein LOC108672967 isoform X2 [Hyalella azteca]
TRINITY_DN10639_c1_g1_i1_5	XP_022117748.1	1.2e-10	38/123(30.89)	73	uncharacterized protein LOC110995082 [Pieris rapae]
TRINITY_DN10645_c0_g1_i1_8	XP_019625373.1	2.7e-154	271/424(63.92)	552	PREDICTED: probable imidazolonepropionase [Branchiostoma belcheri]
TRINITY_DN10645_c0_g1_i2_6	XP_013781798.1	3.1e-46	105/172(61.05)	192	equilibrative nucleoside transporter 4-like [Limulus polyphemus]
TRINITY_DN10653_c0_g1_i1_6	XP_015992119.1	5.6e-10	41/100(41.00)	72	PREDICTED: telomere length regulation protein TEL2 homolog isoform X1 [Rousettus aegyptiacus]
TRINITY_DN10654_c0_g1_i1_1	XP_014661400.1	4.3e-10	51/174(29.31)	72	PREDICTED: uncharacterized protein LOC106804647 [Priapulus caudatus]
TRINITY_DN10654_c0_g1_i1_3	XP_018021113.1	9.9e-38	70/106(66.04)	163	PREDICTED: CUB and sushi domain-containing protein 1-like, partial [Hyalella azteca]
TRINITY_DN10655_c0_g1_i2_6	XP_018022865.1	4.1e-11	32/51(62.75)	75	PREDICTED: LOW QUALITY PROTEIN: ATP-binding cassette sub-family A member 3-like [Hyalella azteca]
TRINITY_DN10656_c0_g2_i1_7	XP_023941065.1	4.4e-30	74/170(43.53)	138	Down syndrome cell adhesion molecule-like protein Dscam2 [Bicyclus anynana]
TRINITY_DN10659_c0_g1_i1_3	EFX83825.1	1.3e-124	232/366(63.39)	453	hypothetical protein DAPPUDRAFT_315464 [Daphnia pulex]
TRINITY_DN10660_c0_g1_i1_7	ALK82306.1	3.1e-15	52/81(64.20)	88	scavenger receptor class B type I protein [Macrobrachium nipponense]
TRINITY_DN10671_c0_g1_i1_6	XP_011453760.1	1.0e-40	77/143(53.85)	174	PREDICTED: GPI mannosyltransferase 3-like [Crassostrea gigas]
TRINITY_DN10676_c0_g1_i1_3	KZS14976.1	2.1e-72	156/378(41.27)	280	Retinol dehydrogenase 8 [Daphnia magna]
TRINITY_DN10678_c0_g1_i2_6	XP_018012519.1	3.3e-09	29/53(54.72)	69	PREDICTED: protein tramtrack, beta isoform-like isoform X6 [Hyalella azteca]
TRINITY_DN1067_c0_g1_i1_5	XP_018026993.1	2.9e-299	578/946(61.10)	1035	PREDICTED: N-alpha-acetyltransferase 15, NatA auxiliary subunit-like [Hyalella azteca]
TRINITY_DN10690_c0_g1_i1_3	XP_015767113.1	3.6e-16	40/75(53.33)	92	PREDICTED: uncharacterized protein LOC107345869 [Acropora digitifera]
TRINITY_DN10695_c0_g1_i1_2	XP_018014724.1	9.4e-204	340/704(48.30)	718	PREDICTED: dipeptidyl aminopeptidase-like protein 6 [Hyalella azteca]
TRINITY_DN10699_c0_g1_i1_6	ODM98635.1	3.9e-58	116/127(91.34)	231	Hairy/enhancer-of-split related with YRPW motif protein [Orchesella cincta]
TRINITY_DN10699_c0_g1_i2_2	XP_018027577.1	2.4e-146	290/629(46.10)	526	PREDICTED: vacuolar protein sorting-associated protein 33B-like [Hyalella azteca]
TRINITY_DN106_c0_g1_i1_6	XP_018007452.1	4.5e-12	52/114(45.61)	78	PREDICTED: homeotic protein spalt-major-like [Hyalella azteca]
TRINITY_DN10705_c0_g1_i1_5	XP_018896495.1	5.4e-08	47/138(34.06)	65	PREDICTED: uncharacterized protein LOC109030135 [Bemisia tabaci]
TRINITY_DN10729_c0_g1_i1_8	XP_018910034.1	6.7e-11	32/61(52.46)	75	PREDICTED: LOW QUALITY PROTEIN: uncharacterized protein LOC109039133 [Bemisia tabaci]
TRINITY_DN10733_c0_g1_i1_7	XP_015518682.1	9.0e-12	34/66(51.52)	77	PREDICTED: uncharacterized protein LOC107223509 [Neodiprion lecontei]
TRINITY_DN10736_c0_g1_i1_1	AYC12386.1	1.1e-69	129/190(67.89)	270	transforming growth factor beta receptor type-1 [Palaemon carinicauda]
TRINITY_DN10743_c0_g1_i1_3	XP_002018385.1	5.4e-27	60/87(68.97)	127	GL17678 [Drosophila persimilis]
TRINITY_DN10743_c0_g2_i1_6	AEI83216.1	1.5e-74	155/256(60.55)	287	partner of drosha-like protein [Penaeus vannamei]
TRINITY_DN10758_c0_g1_i2_6	XP_018014945.1	1.7e-63	112/191(58.64)	250	PREDICTED: uncharacterized protein LOC108671862 [Hyalella azteca]
TRINITY_DN10768_c0_g1_i1_6	XP_006123994.1	3.7e-39	88/180(48.89)	168	tigger transposable element-derived protein 1-like [Pelodiscus sinensis]
TRINITY_DN10786_c0_g1_i1_4	XP_015781130.1	7.1e-46	84/209(40.19)	192	locomotion-related protein Hikaru genki [Tetranychus urticae]
TRINITY_DN10786_c0_g2_i1_4	XP_022242842.1	3.2e-57	97/231(41.99)	229	locomotion-related protein Hikaru genki-like [Limulus polyphemus]
TRINITY_DN10796_c0_g1_i1_6	XP_018023674.1	2.5e-39	77/109(70.64)	168	PREDICTED: piggyBac transposable element-derived protein 4-like [Hyalella azteca]
TRINITY_DN10797_c0_g1_i1_3	XP_018012888.1	5.6e-35	74/174(42.53)	155	PREDICTED: hyaluronidase-like [Hyalella azteca]
TRINITY_DN10802_c0_g1_i1_3	XP_018786598.1	1.0e-220	387/741(52.23)	774	PREDICTED: furin-like protease 2 [Bactrocera latifrons]
TRINITY_DN10803_c0_g1_i1_8	XP_018022507.1	6.1e-84	148/259(57.14)	318	PREDICTED: mannosyl-oligosaccharide 1,2-alpha-mannosidase IA-like [Hyalella azteca]
TRINITY_DN10806_c0_g1_i1_8	XP_018026204.1	8.3e-32	66/106(62.26)	143	PREDICTED: glucose dehydrogenase [FAD, quinone]-like [Hyalella azteca]
TRINITY_DN10809_c0_g1_i1_7	ACY66623.1	3.5e-16	42/45(93.33)	92	ribosomal protein L44e [Scylla paramamosain]
TRINITY_DN10811_c0_g1_i1_2	XP_011421341.1	3.4e-40	80/127(62.99)	171	PREDICTED: uncharacterized protein LOC105323971 [Crassostrea gigas]
TRINITY_DN10813_c0_g1_i1_3	XP_020914493.1	8.2e-07	32/71(45.07)	60	uncharacterized protein LOC110252067 [Exaiptasia pallida]
TRINITY_DN10814_c0_g1_i1_6	XP_021923284.1	2.0e-44	99/194(51.03)	186	cytoplasmic dynein 2 light intermediate chain 1 isoform X2 [Zootermopsis nevadensis]
TRINITY_DN10816_c0_g1_i1_4	XP_021917952.1	8.8e-12	36/86(41.86)	77	uncharacterized protein LOC110828997 [Zootermopsis nevadensis]
TRINITY_DN10817_c0_g1_i1_3	XP_021962548.1	1.3e-13	59/87(67.82)	84	nuclear factor 1 X-type-like isoform X2 [Folsomia candida]
TRINITY_DN10822_c0_g1_i1_7	XP_018024858.1	7.1e-07	31/115(26.96)	62	PREDICTED: monocarboxylate transporter 6-like [Hyalella azteca]
TRINITY_DN10825_c0_g1_i1_2	XP_018021837.1	2.4e-36	81/145(55.86)	159	PREDICTED: uncharacterized protein LOC108678018 [Hyalella azteca]
TRINITY_DN10828_c0_g2_i1_5	XP_018009095.1	4.8e-84	153/264(57.95)	318	PREDICTED: Bardet-Biedl syndrome 4 protein-like [Hyalella azteca]
TRINITY_DN10829_c0_g1_i1_6	XP_022778425.1	2.0e-99	167/232(71.98)	369	uncharacterized protein LOC111319981 [Stylophora pistillata]
TRINITY_DN10829_c0_g2_i1_6	PFX17265.1	6.6e-59	115/150(76.67)	234	Retrovirus-related Pol polyprotein from transposon 17.6 [Stylophora pistillata]
TRINITY_DN1082_c0_g1_i1_5	XP_018017251.1	1.3e-47	121/144(84.03)	196	PREDICTED: transient receptor potential-gamma protein-like [Hyalella azteca]
TRINITY_DN10832_c0_g1_i1_3	XP_018023090.1	8.1e-24	51/104(49.04)	117	PREDICTED: uncharacterized protein LOC108679078 [Hyalella azteca]
TRINITY_DN10832_c0_g2_i1_3	XP_018023090.1	8.3e-36	72/158(45.57)	157	PREDICTED: uncharacterized protein LOC108679078 [Hyalella azteca]
TRINITY_DN10836_c0_g1_i1_2	XP_017768868.1	3.5e-78	143/169(84.62)	300	PREDICTED: uncharacterized protein LOC108557011 isoform X3 [Nicrophorus vespilloides]
TRINITY_DN10838_c1_g1_i1_5	KFM73192.1	1.3e-16	48/107(44.86)	93	RNA-directed DNA polymerase from mobile element jockey, partial [Stegodyphus mimosarum]
TRINITY_DN1084_c0_g1_i1_5	XP_013884305.1	2.5e-25	56/105(53.33)	122	PREDICTED: RNA-directed DNA polymerase from mobile element jockey-like, partial [Austrofundulus limnaeus]
TRINITY_DN10859_c0_g1_i1_3	CCE46016.1	5.9e-71	134/139(96.40)	274	putative 40S ribosomal protein S12 [Nephrops norvegicus]
TRINITY_DN10860_c0_g1_i1_2	XP_018592501.1	3.0e-85	152/242(62.81)	323	PREDICTED: intraflagellar transport protein 172 homolog isoform X1 [Scleropages formosus]
TRINITY_DN10864_c0_g1_i1_6	XP_018422787.1	8.7e-139	254/438(57.99)	501	PREDICTED: LOW QUALITY PROTEIN: tigger transposable element-derived protein 1-like [Nanorana parkeri]
TRINITY_DN10876_c0_g1_i1_7	XP_018006863.1	2.2e-71	168/392(42.86)	277	PREDICTED: proproteinase E-like [Hyalella azteca]
TRINITY_DN10880_c0_g1_i1_1	XP_023311035.1	1.0e-34	74/135(54.81)	153	piggyBac transposable element-derived protein 4-like [Anoplophora glabripennis]
TRINITY_DN10883_c0_g1_i1_6	KXJ11352.1	4.4e-17	39/76(51.32)	94	Retrovirus-related Pol polyprotein from transposon 17.6 [Exaiptasia pallida]
TRINITY_DN10887_c0_g2_i1_5	KZS10109.1	1.1e-28	67/133(50.38)	133	Uncharacterized protein APZ42_025501 [Daphnia magna]
TRINITY_DN10894_c1_g1_i1_3	XP_018025254.1	3.6e-17	54/107(50.47)	95	PREDICTED: uncharacterized protein LOC108680848 [Hyalella azteca]
TRINITY_DN10898_c0_g1_i1_6	XP_023943893.1	4.6e-08	40/104(38.46)	65	uncharacterized protein LOC112050011 [Bicyclus anynana]
TRINITY_DN10909_c0_g1_i1_6	XP_015905269.1	5.5e-74	146/264(55.30)	285	short-chain dehydrogenase/reductase family 16C member 6-like isoform X3 [Parasteatoda tepidariorum]
TRINITY_DN10912_c0_g1_i1_6	APG53786.1	1.4e-08	39/109(35.78)	67	transient receptor potential cation channel pyrexia [Homarus americanus]
TRINITY_DN10914_c0_g1_i1_6	XP_021928373.1	2.5e-60	118/186(63.44)	239	multidrug resistance-associated protein 5-like isoform X3 [Zootermopsis nevadensis]
TRINITY_DN10929_c0_g1_i1_5	XP_022173423.1	2.3e-15	42/101(41.58)	89	tigger transposable element-derived protein 6-like [Myzus persicae]
TRINITY_DN10934_c0_g1_i1_6	XP_018013171.1	5.2e-19	58/151(38.41)	101	PREDICTED: poly(U)-specific endoribonuclease-A-like [Hyalella azteca]
TRINITY_DN10938_c0_g1_i1_6	XP_011674128.1	6.2e-23	62/134(46.27)	114	PREDICTED: uncharacterized protein LOC105443035, partial [Strongylocentrotus purpuratus]
TRINITY_DN10938_c0_g1_i1_8	XP_014295608.1	7.3e-08	31/48(64.58)	65	PREDICTED: microtubule-associated protein futsch [Microplitis demolitor]
TRINITY_DN10940_c0_g1_i1_2	XP_018022126.1	2.4e-17	51/91(56.04)	96	PREDICTED: cuticle protein 8-like isoform X1 [Hyalella azteca]
TRINITY_DN10941_c0_g3_i1_3	XP_013090753.1	4.2e-10	31/84(36.90)	71	PREDICTED: uncharacterized protein LOC106074525, partial [Biomphalaria glabrata]
TRINITY_DN10946_c0_g1_i1_5	XP_022290286.1	1.9e-17	60/171(35.09)	96	uncharacterized protein LOC111101924 [Crassostrea virginica]
TRINITY_DN10958_c0_g1_i1_6	XP_018016429.1	7.7e-67	129/207(62.32)	261	PREDICTED: cystinosin homolog [Hyalella azteca]
TRINITY_DN10967_c0_g2_i1_3	ELK02885.1	1.2e-17	47/101(46.53)	97	Protein dpy-19 like protein 3 [Pteropus alecto]
TRINITY_DN10980_c0_g1_i1_1	XP_018013453.1	1.3e-25	57/143(39.86)	124	PREDICTED: lachesin-like [Hyalella azteca]
TRINITY_DN10981_c1_g1_i1_6	XP_023219563.1	2.1e-109	196/329(59.57)	403	serine/threonine-protein kinase Nek1-like [Centruroides sculpturatus]
TRINITY_DN10983_c0_g1_i1_3	AOR07219.1	7.5e-51	97/100(97.00)	206	inward rectifier potassium channel [Homarus americanus]
TRINITY_DN10987_c0_g1_i1_7	APF30029.1	5.0e-99	176/217(81.11)	368	ionotropic glutamate receptor kainate 2B, partial [Homarus americanus]
TRINITY_DN10988_c0_g1_i1_5	BAM35674.1	1.9e-23	53/109(48.62)	116	putative reverse transcriptase [Penaeus japonicus]
TRINITY_DN10997_c0_g1_i1_5	XP_015115917.1	1.2e-100	183/302(60.60)	374	PREDICTED: RING finger protein 113A [Diachasma alloeum]
TRINITY_DN11017_c0_g1_i1_5	AJP60220.1	3.1e-144	247/249(99.20)	518	vitellogenin receptor [Macrobrachium nipponense]
TRINITY_DN11018_c0_g1_i1_6	KFM80052.1	2.9e-33	68/115(59.13)	148	Sushi, von Willebrand factor type A, EGF and pentraxin domain-containing protein 1, partial [Stegodyphus mimosarum]
TRINITY_DN11022_c0_g2_i1_7	XP_009019054.1	1.1e-44	92/174(52.87)	187	hypothetical protein HELRODRAFT_174269 [Helobdella robusta]
TRINITY_DN11023_c0_g1_i1_6	APC26117.1	8.0e-44	94/136(69.12)	184	metabotropic glutamate receptor type 3 [Homarus americanus]
TRINITY_DN11026_c0_g1_i1_6	XP_018027346.1	2.4e-39	86/108(79.63)	168	PREDICTED: uncharacterized protein LOC108682652 [Hyalella azteca]
TRINITY_DN1102_c0_g1_i1_6	XP_018018433.1	8.0e-115	247/597(41.37)	422	PREDICTED: eukaryotic translation initiation factor 2A-like [Hyalella azteca]
TRINITY_DN11032_c0_g1_i1_6	XP_022241184.1	1.6e-37	118/415(28.43)	164	glutamate receptor ionotropic, delta-1-like [Limulus polyphemus]
TRINITY_DN11042_c0_g1_i3_4	XP_018020332.1	1.3e-79	164/246(66.67)	305	PREDICTED: Golgi SNAP receptor complex member 1-like [Hyalella azteca]
TRINITY_DN11042_c0_g2_i1_5	KXJ06669.1	9.8e-26	70/154(45.45)	124	Retrovirus-related Pol polyprotein from transposon 17.6 [Exaiptasia pallida]
TRINITY_DN11046_c0_g1_i2_6	XP_018021101.1	4.7e-51	92/98(93.88)	208	PREDICTED: RING finger protein nhl-1-like isoform X3 [Hyalella azteca]
TRINITY_DN11056_c0_g1_i1_4	KXJ23439.1	1.3e-81	177/453(39.07)	311	putative uncharacterized transposon-derived protein F52C9.6 [Exaiptasia pallida]
TRINITY_DN1105_c0_g1_i1_8	AOO86753.1	4.0e-160	278/280(99.29)	571	delayed rectifier potassium channel Shab, partial [Homarus americanus]
TRINITY_DN11064_c0_g1_i1_6	XP_018016120.1	1.1e-37	77/188(40.96)	164	PREDICTED: probable cytochrome P450 49a1 [Hyalella azteca]
TRINITY_DN11065_c0_g1_i1_3	XP_026680619.1	2.6e-42	91/213(42.72)	180	LOW QUALITY PROTEIN: spectrin beta chain, non-erythrocytic 1-like [Diaphorina citri]
TRINITY_DN11065_c0_g1_i1_6	KXJ22254.1	8.7e-13	47/113(41.59)	80	Gag-Pol polyprotein [Exaiptasia pallida]
TRINITY_DN11068_c0_g1_i1_6	XP_021346945.1	4.0e-15	52/131(39.69)	88	uncharacterized protein LOC110446230 [Mizuhopecten yessoensis]
TRINITY_DN11071_c0_g1_i1_5	XP_018017151.1	4.9e-20	50/146(34.25)	106	PREDICTED: uncharacterized protein LOC108673789 [Hyalella azteca]
TRINITY_DN11078_c0_g1_i1_3	XP_014773163.1	2.2e-10	55/171(32.16)	73	PREDICTED: uncharacterized protein LOC106871293 [Octopus bimaculoides]
TRINITY_DN11081_c0_g2_i1_5	XP_022189961.1	1.7e-51	96/178(53.93)	209	cysteine sulfinic acid decarboxylase [Nilaparvata lugens]
TRINITY_DN11086_c0_g1_i1_5	EFX90234.1	7.8e-81	147/223(65.92)	308	hypothetical protein DAPPUDRAFT_299942 [Daphnia pulex]
TRINITY_DN11087_c0_g1_i1_2	CRK98133.1	1.3e-07	30/66(45.45)	63	CLUMA_CG011501, isoform A [Clunio marinus]
TRINITY_DN1108_c0_g1_i1_6	XP_015747820.1	8.6e-17	41/74(55.41)	94	PREDICTED: putative nuclease HARBI1 [Acropora digitifera]
TRINITY_DN11091_c0_g1_i2_6	XP_018009198.1	2.2e-42	84/134(62.69)	179	PREDICTED: uncharacterized protein LOC108666787 [Hyalella azteca]
TRINITY_DN11093_c0_g1_i1_6	KOC60254.1	1.4e-13	39/48(81.25)	84	Histone-lysine N-methyltransferase SETMAR, partial [Habropoda laboriosa]
TRINITY_DN11093_c0_g2_i1_6	KOC60254.1	4.1e-15	42/49(85.71)	89	Histone-lysine N-methyltransferase SETMAR, partial [Habropoda laboriosa]
TRINITY_DN11097_c0_g1_i1_8	XP_026550410.1	2.2e-09	49/180(27.22)	70	uncharacterized protein LOC113432497, partial [Notechis scutatus]
TRINITY_DN11098_c0_g1_i1_6	XP_018025696.1	5.3e-33	93/236(39.41)	149	PREDICTED: uncharacterized protein LOC108681201 [Hyalella azteca]
TRINITY_DN11098_c0_g2_i1_6	XP_023229811.1	3.3e-25	68/151(45.03)	122	uncharacterized protein LOC111630039 [Centruroides sculpturatus]
TRINITY_DN11100_c0_g1_i1_5	XP_018016714.1	9.2e-38	84/157(53.50)	165	PREDICTED: protein JTB-like [Hyalella azteca]
TRINITY_DN11102_c0_g1_i1_3	XP_018025629.1	2.5e-33	91/219(41.55)	149	PREDICTED: neural-cadherin-like [Hyalella azteca]
TRINITY_DN11104_c0_g1_i1_3	XP_016065879.1	7.7e-25	59/136(43.38)	120	PREDICTED: high affinity cAMP-specific and IBMX-insensitive 3',5'-cyclic phosphodiesterase 8B [Miniopterus natalensis]
TRINITY_DN11107_c0_g1_i1_6	XP_014775525.1	3.9e-15	41/98(41.84)	88	PREDICTED: uncharacterized protein LOC106872883 [Octopus bimaculoides]
TRINITY_DN11108_c0_g3_i1_6	XP_018006424.1	3.8e-50	99/152(65.13)	205	PREDICTED: sorting nexin-13-like [Hyalella azteca]
TRINITY_DN1110_c0_g1_i1_6	XP_018019839.1	1.4e-22	62/131(47.33)	113	PREDICTED: uncharacterized protein LOC108676289 [Hyalella azteca]
TRINITY_DN11110_c0_g1_i1_8	XP_018014516.1	1.6e-09	55/179(30.73)	71	PREDICTED: bestrophin-4-like, partial [Hyalella azteca]
TRINITY_DN11133_c0_g1_i1_3	XP_018026732.1	4.5e-09	41/78(52.56)	68	PREDICTED: serine/threonine-protein phosphatase 2A regulatory subunit B'' subunit beta-like [Hyalella azteca]
TRINITY_DN11134_c0_g1_i1_5	XP_023231795.1	9.8e-15	42/117(35.90)	87	uncharacterized protein LOC111631721 [Centruroides sculpturatus]
TRINITY_DN11134_c0_g2_i1_5	KYN09487.1	9.0e-38	73/123(59.35)	163	hypothetical protein ALC57_18392 [Trachymyrmex cornetzi]
TRINITY_DN11138_c0_g1_i1_6	XP_018021136.1	2.3e-72	154/335(45.97)	280	PREDICTED: protocadherin Fat 2-like [Hyalella azteca]
TRINITY_DN1113_c0_g1_i1_3	PAA46946.1	1.0e-06	36/82(43.90)	61	hypothetical protein BOX15_Mlig009783g10, partial [Macrostomum lignano]
TRINITY_DN11143_c0_g1_i1_3	KZS11895.1	2.4e-11	40/111(36.04)	76	Uncharacterized protein APZ42_023308 [Daphnia magna]
TRINITY_DN11148_c0_g1_i1_6	XP_018020815.1	5.3e-83	225/605(37.19)	315	PREDICTED: uncharacterized protein LOC108677161 [Hyalella azteca]
TRINITY_DN11153_c0_g1_i1_6	XP_011674128.1	1.8e-10	38/83(45.78)	72	PREDICTED: uncharacterized protein LOC105443035, partial [Strongylocentrotus purpuratus]
TRINITY_DN11154_c0_g1_i1_5	ACY66494.3	3.1e-13	49/134(36.57)	83	serine protease [Scylla paramamosain]
TRINITY_DN11154_c0_g2_i1_5	ACY66494.3	9.7e-26	60/154(38.96)	124	serine protease [Scylla paramamosain]
TRINITY_DN11155_c0_g1_i1_6	PIK40694.1	4.3e-17	53/127(41.73)	95	hypothetical protein BSL78_22449 [Apostichopus japonicus]
TRINITY_DN11155_c0_g2_i1_6	PIK46988.1	1.1e-15	56/157(35.67)	91	hypothetical protein BSL78_16126 [Apostichopus japonicus]
TRINITY_DN11156_c0_g1_i1_5	XP_021352719.1	9.1e-39	106/317(33.44)	168	GPI ethanolamine phosphate transferase 1-like [Mizuhopecten yessoensis]
TRINITY_DN11164_c1_g1_i1_5	KZS10043.1	1.6e-24	116/417(27.82)	121	Uncharacterized protein APZ42_025579 [Daphnia magna]
TRINITY_DN11166_c0_g1_i1_8	AFX93743.1	2.0e-19	49/80(61.25)	102	ferritin 1 [Ruditapes decussatus]
TRINITY_DN11175_c0_g1_i1_4	XP_018014065.1	2.7e-41	115/426(27.00)	177	PREDICTED: uncharacterized protein LOC108671097 [Hyalella azteca]
TRINITY_DN11176_c0_g1_i1_6	XP_018014568.1	2.9e-08	45/145(31.03)	65	PREDICTED: glutamate receptor ionotropic, delta-1-like [Hyalella azteca]
TRINITY_DN11176_c0_g2_i1_6	XP_022241184.1	1.7e-07	36/113(31.86)	63	glutamate receptor ionotropic, delta-1-like [Limulus polyphemus]
TRINITY_DN11177_c0_g2_i1_6	XP_023242424.1	6.3e-55	140/412(33.98)	223	PR domain zinc finger protein 5-like [Centruroides sculpturatus]
TRINITY_DN11182_c0_g1_i2_3	XP_018026968.1	1.3e-16	45/93(48.39)	95	PREDICTED: bone morphogenetic protein 1-like isoform X1 [Hyalella azteca]
TRINITY_DN11184_c0_g1_i1_7	PSN54628.1	4.4e-30	65/125(52.00)	138	hypothetical protein C0J52_10831 [Blattella germanica]
TRINITY_DN11189_c0_g1_i1_3	XP_019538501.1	4.0e-06	26/64(40.62)	58	PREDICTED: uncharacterized protein LOC109409506 [Aedes albopictus]
TRINITY_DN11192_c0_g1_i1_6	XP_026277427.1	2.1e-16	55/127(43.31)	92	piggyBac transposable element-derived protein 4-like [Frankliniella occidentalis]
TRINITY_DN11192_c0_g2_i1_6	XP_025159867.1	3.5e-38	85/186(45.70)	165	piggyBac transposable element-derived protein 4-like [Harpegnathos saltator]
TRINITY_DN111_c0_g1_i1_6	XP_018017947.1	7.8e-40	101/206(49.03)	171	PREDICTED: uncharacterized protein LOC108674500, partial [Hyalella azteca]
TRINITY_DN11200_c0_g1_i1_3	KZS17365.1	7.4e-44	91/185(49.19)	184	ABC transporter [Daphnia magna]
TRINITY_DN11203_c0_g1_i1_6	XP_014675318.1	2.9e-12	37/114(32.46)	79	PREDICTED: uncharacterized protein LOC106815378 [Priapulus caudatus]
TRINITY_DN11224_c0_g1_i1_2	KDR19126.1	2.2e-158	278/449(61.92)	566	Phosphatidylinositide phosphatase SAC2 [Zootermopsis nevadensis]
TRINITY_DN1122_c0_g1_i1_2	XP_018017761.1	2.4e-09	66/294(22.45)	71	PREDICTED: innexin inx2-like [Hyalella azteca]
TRINITY_DN11231_c0_g1_i4_8	XP_018024344.1	7.9e-149	278/331(83.99)	534	PREDICTED: CUGBP Elav-like family member 4 [Hyalella azteca]
TRINITY_DN11233_c0_g1_i1_8	XP_014670056.1	2.6e-19	56/106(52.83)	103	PREDICTED: uncharacterized protein LOC106811049 [Priapulus caudatus]
TRINITY_DN11234_c0_g1_i1_3	XP_018015438.1	5.5e-95	170/332(51.20)	355	PREDICTED: LOW QUALITY PROTEIN: multidrug resistance-associated protein 1-like, partial [Hyalella azteca]
TRINITY_DN11234_c0_g2_i1_3	XP_015591554.1	1.3e-160	290/427(67.92)	573	multidrug resistance-associated protein 1 isoform X1 [Cephus cinctus]
TRINITY_DN11238_c0_g1_i1_6	XP_011439250.1	4.2e-28	60/106(56.60)	131	PREDICTED: alpha-tubulin N-acetyltransferase isoform X1 [Crassostrea gigas]
TRINITY_DN11238_c0_g2_i2_6	XP_018015589.1	6.8e-12	66/218(30.28)	78	PREDICTED: tensin-like [Hyalella azteca]
TRINITY_DN11248_c0_g1_i1_6	XP_018028211.1	1.9e-06	38/85(44.71)	60	PREDICTED: early growth response protein 1-B-like [Hyalella azteca]
TRINITY_DN11256_c0_g1_i1_3	PIK49645.1	1.8e-18	44/89(49.44)	99	hypothetical protein BSL78_13472 [Apostichopus japonicus]
TRINITY_DN11261_c0_g1_i2_3	ADW27185.1	3.1e-67	129/129(100.00)	262	ubiquitin/ribosomal L40 fusion protein [Eriocheir sinensis]
TRINITY_DN11266_c0_g1_i1_3	XP_018018161.1	3.0e-12	96/437(21.97)	82	PREDICTED: uncharacterized protein LOC108674707 [Hyalella azteca]
TRINITY_DN11267_c0_g1_i1_5	XP_017952976.1	1.2e-08	42/117(35.90)	67	PREDICTED: uncharacterized protein LOC105946481 [Xenopus tropicalis]
TRINITY_DN11275_c0_g1_i1_4	AQT18916.1	2.7e-36	75/106(70.75)	158	chitin-binding protein [Macrobrachium nipponense]
TRINITY_DN11277_c0_g1_i1_1	XP_018007682.1	5.8e-18	50/105(47.62)	100	PREDICTED: uncharacterized protein LOC108665441 isoform X2 [Hyalella azteca]
TRINITY_DN11278_c0_g1_i1_3	XP_021371356.1	5.1e-43	112/336(33.33)	182	MAM and LDL-receptor class A domain-containing protein 2-like [Mizuhopecten yessoensis]
TRINITY_DN1127_c0_g1_i1_3	EFV53219.1	4.7e-16	61/131(46.56)	92	putative integrase core domain protein [Trichinella spiralis]
TRINITY_DN11285_c0_g1_i1_8	XP_018012777.1	9.0e-21	182/379(48.02)	109	PREDICTED: B-cell lymphoma/leukemia 11A-like [Hyalella azteca]
TRINITY_DN11287_c0_g2_i1_3	XP_021938792.1	3.2e-156	303/558(54.30)	559	LOW QUALITY PROTEIN: WD repeat and FYVE domain-containing protein 3-like [Zootermopsis nevadensis]
TRINITY_DN11290_c0_g1_i1_4	XP_021957686.1	2.7e-11	40/87(45.98)	76	uncharacterized protein LOC110853683 isoform X1 [Folsomia candida]
TRINITY_DN11290_c0_g1_i2_3	AMN88381.1	3.3e-130	231/266(86.84)	473	c-type lectin [Macrobrachium rosenbergii]
TRINITY_DN11292_c0_g1_i1_2	XP_008181290.1	1.5e-22	58/107(54.21)	112	PREDICTED: LOW QUALITY PROTEIN: DNA (cytosine-5)-methyltransferase PliMCI [Acyrthosiphon pisum]
TRINITY_DN11295_c0_g1_i1_6	XP_022251164.1	2.8e-48	90/152(59.21)	199	piggyBac transposable element-derived protein 4-like isoform X2 [Limulus polyphemus]
TRINITY_DN11297_c0_g1_i1_5	XP_014222082.1	1.3e-136	282/593(47.55)	494	multidrug resistance-associated protein 1 isoform X9 [Trichogramma pretiosum]
TRINITY_DN11300_c0_g1_i1_6	APC26117.1	1.4e-42	82/141(58.16)	179	metabotropic glutamate receptor type 3 [Homarus americanus]
TRINITY_DN11300_c0_g1_i1_7	XP_012263255.1	3.1e-30	61/108(56.48)	139	uncharacterized protein LOC105690206 [Athalia rosae]
TRINITY_DN11302_c0_g1_i1_3	ANV22162.1	6.7e-108	223/630(35.40)	399	telomerase reverse transcriptase [Metapenaeus ensis]
TRINITY_DN11305_c0_g1_i1_5	KFM64238.1	2.1e-44	84/154(54.55)	186	RNA-directed DNA polymerase from mobile element jockey, partial [Stegodyphus mimosarum]
TRINITY_DN11307_c0_g1_i1_5	XP_018009869.1	9.5e-22	72/141(51.06)	110	PREDICTED: uncharacterized protein LOC108667362 [Hyalella azteca]
TRINITY_DN1130_c0_g1_i1_5	XP_015766421.1	6.9e-12	47/138(34.06)	78	PREDICTED: uncharacterized protein LOC107345227 [Acropora digitifera]
TRINITY_DN11317_c0_g1_i1_3	XP_022249210.1	1.5e-146	355/1013(35.04)	528	protogenin-like isoform X1 [Limulus polyphemus]
TRINITY_DN11320_c0_g1_i1_7	P82119.1	1.5e-08	40/89(44.94)	66	RecName: Full=Cuticle protein 6; AltName: Full=BcNCP14.9
TRINITY_DN11328_c0_g1_i1_1	KFM70007.1	3.0e-183	286/445(64.27)	649	Alpha-L-fucosidase, partial [Stegodyphus mimosarum]
TRINITY_DN11328_c0_g1_i2_6	XP_023716860.1	5.9e-26	68/163(41.72)	125	UPF0687 protein C20orf27 homolog isoform X2 [Cryptotermes secundus]
TRINITY_DN11330_c0_g1_i1_2	XP_016848058.1	2.8e-09	31/47(65.96)	69	PREDICTED: tigger transposable element-derived protein 1-like [Anolis carolinensis]
TRINITY_DN11331_c0_g1_i1_6	XP_023718737.1	1.5e-130	244/489(49.90)	474	SPRY domain-containing protein 3-like isoform X1 [Cryptotermes secundus]
TRINITY_DN11332_c0_g1_i1_6	AWU67219.1	7.0e-105	172/242(71.07)	388	putative chitinase, partial [Crangon crangon]
TRINITY_DN11337_c0_g1_i1_6	XP_013387739.1	2.3e-22	57/132(43.18)	113	protein Star-like [Lingula anatina]
TRINITY_DN11339_c0_g1_i1_4	XP_010133229.1	1.9e-08	42/113(37.17)	66	PREDICTED: LOW QUALITY PROTEIN: ATP-binding cassette sub-family A member 13-like, partial [Buceros rhinoceros silvestris]
TRINITY_DN1133_c0_g1_i1_7	XP_023320429.1	7.9e-09	39/99(39.39)	67	carbohydrate sulfotransferase 11-like [Eurytemora affinis]
TRINITY_DN11340_c0_g1_i1_6	XP_021940742.1	6.2e-128	250/356(70.22)	464	potassium voltage-gated channel subfamily H member 2 isoform X3 [Zootermopsis nevadensis]
TRINITY_DN11341_c0_g1_i1_6	XP_016355147.1	2.0e-31	101/360(28.06)	145	PREDICTED: uncharacterized protein LOC107698608 [Sinocyclocheilus anshuiensis]
TRINITY_DN11343_c0_g1_i1_6	XP_018009269.1	6.8e-53	108/148(72.97)	216	PREDICTED: acidic leucine-rich nuclear phosphoprotein 32 family member A-like [Hyalella azteca]
TRINITY_DN11347_c0_g1_i1_4	XP_018027505.1	6.9e-65	116/157(73.89)	255	PREDICTED: protein SYS1 homolog [Hyalella azteca]
TRINITY_DN11354_c0_g1_i1_3	XP_018025277.1	5.4e-46	85/162(52.47)	191	PREDICTED: Down syndrome cell adhesion molecule-like protein Dscam2 [Hyalella azteca]
TRINITY_DN11354_c0_g2_i1_3	XP_018025277.1	2.2e-42	86/178(48.31)	179	PREDICTED: Down syndrome cell adhesion molecule-like protein Dscam2 [Hyalella azteca]
TRINITY_DN11354_c1_g1_i1_4	XP_018013669.1	7.1e-21	59/115(51.30)	107	PREDICTED: uncharacterized protein LOC108670693 [Hyalella azteca]
TRINITY_DN11354_c1_g2_i1_4	XP_018013669.1	4.6e-44	143/408(35.05)	186	PREDICTED: uncharacterized protein LOC108670693 [Hyalella azteca]
TRINITY_DN11358_c0_g1_i1_2	XP_018013147.1	2.7e-52	165/255(64.71)	213	PREDICTED: T-box transcription factor TBX20-like [Hyalella azteca]
TRINITY_DN11367_c0_g1_i1_6	XP_018009075.1	1.2e-07	65/164(39.63)	63	PREDICTED: uncharacterized protein LOC108666668 [Hyalella azteca]
TRINITY_DN11374_c0_g1_i2_6	XP_021929333.1	6.0e-98	191/367(52.04)	365	probable palmitoyltransferase ZDHHC16 isoform X2 [Zootermopsis nevadensis]
TRINITY_DN11380_c0_g1_i1_6	XP_018010045.1	6.9e-133	239/413(57.87)	482	PREDICTED: 72 kDa inositol polyphosphate 5-phosphatase-like [Hyalella azteca]
TRINITY_DN11380_c0_g1_i1_8	XP_018016443.1	1.8e-46	203/757(26.82)	195	PREDICTED: serine-rich adhesin for platelets-like [Hyalella azteca]
TRINITY_DN11389_c0_g1_i1_4	XP_021923912.1	1.3e-49	95/159(59.75)	203	uncharacterized protein LOC110831806 [Zootermopsis nevadensis]
TRINITY_DN11389_c0_g1_i1_8	XP_003702986.1	3.3e-71	130/251(51.79)	275	PREDICTED: endothelin-converting enzyme 1 isoform X2 [Megachile rotundata]
TRINITY_DN1138_c0_g1_i1_8	XP_018023299.1	2.5e-90	148/237(62.45)	339	PREDICTED: uncharacterized protein LOC108679210 [Hyalella azteca]
TRINITY_DN11398_c0_g1_i1_5	XP_021917181.1	2.1e-19	47/84(55.95)	102	phospholipase ABHD3 isoform X1 [Zootermopsis nevadensis]
TRINITY_DN11405_c0_g1_i1_8	XP_022181377.1	5.0e-16	51/139(36.69)	91	uncharacterized protein LOC111041415 [Myzus persicae]
TRINITY_DN11409_c0_g1_i1_6	XP_015765429.1	1.5e-36	71/146(48.63)	159	PREDICTED: uncharacterized protein LOC107344291 [Acropora digitifera]
TRINITY_DN11409_c0_g2_i1_6	PFX26878.1	1.1e-09	66/235(28.09)	71	hypothetical protein AWC38_SpisGene8469 [Stylophora pistillata]
TRINITY_DN1140_c0_g1_i1_2	XP_018026378.1	6.5e-18	147/532(27.63)	100	PREDICTED: uncharacterized protein LOC108681815 [Hyalella azteca]
TRINITY_DN11411_c0_g1_i1_7	XP_018026519.1	3.9e-50	101/105(96.19)	204	PREDICTED: tetratricopeptide repeat protein 28-like isoform X1 [Hyalella azteca]
TRINITY_DN11419_c0_g2_i1_6	XP_026679895.1	5.6e-11	51/72(70.83)	74	uncharacterized protein LOC103509891 [Diaphorina citri]
TRINITY_DN11431_c0_g1_i1_2	KZS18805.1	9.9e-27	49/87(56.32)	126	Sushi [Daphnia magna]
TRINITY_DN11432_c0_g2_i2_6	XP_018024061.1	1.9e-50	136/317(42.90)	207	PREDICTED: kinase D-interacting substrate of 220 kDa-like isoform X1 [Hyalella azteca]
TRINITY_DN11433_c0_g1_i1_6	XP_023723458.1	8.3e-139	232/248(93.55)	501	E3 ubiquitin-protein ligase SIAH1-like [Cryptotermes secundus]
TRINITY_DN11434_c0_g1_i1_8	XP_022810493.1	1.0e-11	29/52(55.77)	78	uncharacterized protein K02A2.6-like [Stylophora pistillata]
TRINITY_DN11435_c0_g1_i1_4	AUM60049.1	6.3e-31	70/126(55.56)	141	cuticle protein AMP13.4 [Penaeus vannamei]
TRINITY_DN11437_c0_g1_i1_6	XP_018009928.1	3.3e-72	181/324(55.86)	280	PREDICTED: potassium voltage-gated channel subfamily H member 8-like [Hyalella azteca]
TRINITY_DN11438_c0_g1_i1_7	XP_018016490.1	9.7e-62	117/118(99.15)	244	PREDICTED: ras-related protein Rab-30-like isoform X2 [Hyalella azteca]
TRINITY_DN11439_c0_g1_i1_4	XP_022251661.1	7.1e-12	39/85(45.88)	77	choline-phosphate cytidylyltransferase A-like isoform X1 [Limulus polyphemus]
TRINITY_DN11446_c0_g1_i1_6	XP_018020181.1	3.5e-20	51/108(47.22)	105	PREDICTED: uncharacterized protein LOC108676592 [Hyalella azteca]
TRINITY_DN11472_c0_g1_i1_4	ASK05860.1	5.9e-53	106/106(100.00)	215	chitin-binding protein, partial [Macrobrachium nipponense]
TRINITY_DN11480_c0_g1_i1_6	XP_022174979.1	3.3e-18	47/108(43.52)	99	uncharacterized protein LOC111036960 [Myzus persicae]
TRINITY_DN11481_c0_g1_i1_8	AAC28351.1	5.1e-46	92/158(58.23)	191	cytochrome P450 [Homarus americanus]
TRINITY_DN11486_c0_g1_i1_5	XP_018010562.1	3.7e-50	115/241(47.72)	205	PREDICTED: vacuolar protein sorting-associated protein 13D-like [Hyalella azteca]
TRINITY_DN1148_c0_g1_i1_4	XP_011187866.1	3.6e-49	104/253(41.11)	203	PREDICTED: sialin [Zeugodacus cucurbitae]
TRINITY_DN11491_c0_g1_i1_8	KFD51261.1	1.8e-07	43/124(34.68)	63	hypothetical protein M513_07861 [Trichuris suis]
TRINITY_DN11494_c0_g1_i2_3	XP_018909498.1	9.4e-36	78/220(35.45)	158	PREDICTED: apolipoprotein D-like [Bemisia tabaci]
TRINITY_DN11507_c0_g1_i1_6	AAN73018.1	4.8e-99	161/258(62.40)	369	endothelin-converting enzyme [Locusta migratoria]
TRINITY_DN1150_c0_g1_i1_6	APA05127.1	1.3e-14	42/110(38.18)	87	polephole-like protein [Penaeus vannamei]
TRINITY_DN11519_c0_g1_i1_8	XP_018012176.1	1.2e-97	165/183(90.16)	363	PREDICTED: peptidyl-prolyl cis-trans isomerase H-like isoform X2 [Hyalella azteca]
TRINITY_DN11523_c0_g1_i1_8	AJG01359.1	2.1e-14	44/88(50.00)	86	sarcoplasmic calcium-binding protein variant a [Eriocheir sinensis]
TRINITY_DN11529_c0_g1_i1_5	XP_018014730.1	2.3e-22	59/95(62.11)	114	PREDICTED: nucleolin-like [Hyalella azteca]
TRINITY_DN11529_c0_g1_i1_8	EKC19530.1	6.7e-49	101/173(58.38)	202	Calcipressin-1 [Crassostrea gigas]
TRINITY_DN1152_c0_g1_i1_2	XP_017478484.1	2.7e-14	43/106(40.57)	86	PREDICTED: ribosomal protein 63, mitochondrial [Rhagoletis zephyria]
TRINITY_DN11531_c0_g1_i1_1	ALT10383.1	3.1e-153	266/567(46.91)	549	juvenile hormone esterase-like protein 1 [Portunus trituberculatus]
TRINITY_DN11532_c0_g1_i1_6	CDW57853.1	7.2e-31	94/278(33.81)	142	Galactosyl T domain containing protein [Trichuris trichiura]
TRINITY_DN11536_c0_g1_i1_6	XP_018014250.1	6.2e-35	71/158(44.94)	154	PREDICTED: PXMP2/4 family protein 4-like [Hyalella azteca]
TRINITY_DN11537_c0_g1_i1_2	EEB13860.1	7.9e-46	86/129(66.67)	191	phosphoinositol 3-phosphate-binding protein, putative [Pediculus humanus corporis]
TRINITY_DN11538_c0_g1_i1_8	XP_013382959.1	1.5e-36	111/325(34.15)	161	uncharacterized protein LOC106153529 [Lingula anatina]
TRINITY_DN11544_c0_g1_i1_8	XP_023308156.1	7.9e-17	64/185(34.59)	94	unconventional myosin-X-like [Lucilia cuprina]
TRINITY_DN11545_c0_g1_i1_3	XP_004535553.1	1.7e-15	48/121(39.67)	90	leucine-rich repeat neuronal protein 3 [Ceratitis capitata]
TRINITY_DN11562_c0_g1_i1_4	ODN04399.1	9.3e-15	46/95(48.42)	87	TNF receptor-associated factor 6 [Orchesella cincta]
TRINITY_DN11562_c0_g2_i1_4	PSN57800.1	1.9e-39	75/115(65.22)	169	hypothetical protein C0J52_04357 [Blattella germanica]
TRINITY_DN11567_c0_g1_i1_3	XP_011665740.1	1.8e-13	69/197(35.03)	83	PREDICTED: uncharacterized protein LOC105436430 [Strongylocentrotus purpuratus]
TRINITY_DN11568_c0_g1_i1_7	KOF71192.1	5.0e-07	46/119(38.66)	61	hypothetical protein OCBIM_22001475mg, partial [Octopus bimaculoides]
TRINITY_DN11570_c0_g1_i1_6	XP_016853940.1	5.3e-06	27/38(71.05)	59	PREDICTED: acylphosphatase-2 [Anolis carolinensis]
TRINITY_DN11570_c0_g2_i1_2	XP_023715369.1	2.9e-89	162/358(45.25)	336	sushi, von Willebrand factor type A, EGF and pentraxin domain-containing protein 1 isoform X3 [Cryptotermes secundus]
TRINITY_DN11577_c0_g1_i2_8	XP_023236232.1	1.8e-40	85/121(70.25)	172	60S ribosomal protein L31 [Centruroides sculpturatus]
TRINITY_DN11579_c0_g1_i1_1	XP_013788877.1	6.1e-41	102/167(61.08)	175	39S ribosomal protein L12, mitochondrial-like [Limulus polyphemus]
TRINITY_DN11580_c0_g1_i1_3	KFM82147.1	4.6e-14	49/139(35.25)	85	4-hydroxyphenylpyruvate dioxygenase-like protein, partial [Stegodyphus mimosarum]
TRINITY_DN11581_c0_g3_i1_2	XP_013783377.2	1.6e-48	101/113(89.38)	199	CUGBP Elav-like family member 4 isoform X3 [Limulus polyphemus]
TRINITY_DN11582_c0_g2_i1_4	XP_018024062.1	8.8e-50	111/138(80.43)	203	PREDICTED: kinase D-interacting substrate of 220 kDa-like isoform X2 [Hyalella azteca]
TRINITY_DN11589_c0_g1_i1_6	XP_018019424.1	2.2e-120	209/404(51.73)	439	PREDICTED: nephrin-like [Hyalella azteca]
TRINITY_DN11600_c0_g1_i1_6	KOF68121.1	1.1e-21	50/103(48.54)	110	hypothetical protein OCBIM_22008067mg [Octopus bimaculoides]
TRINITY_DN11602_c0_g1_i1_3	PSN51267.1	9.8e-10	45/122(36.89)	72	hypothetical protein C0J52_11783 [Blattella germanica]
TRINITY_DN11609_c0_g1_i1_6	AMO03195.1	2.8e-08	38/99(38.38)	65	polo-like kinase 1 [Penaeus monodon]
TRINITY_DN11609_c0_g2_i1_6	AMO03195.1	4.0e-87	156/181(86.19)	328	polo-like kinase 1 [Penaeus monodon]
TRINITY_DN11614_c0_g1_i1_6	XP_015428938.1	1.3e-61	145/418(34.69)	244	PREDICTED: protein pigeon [Dufourea novaeangliae]
TRINITY_DN11616_c0_g1_i1_4	XP_018018730.1	1.4e-83	153/300(51.00)	318	PREDICTED: gamma-glutamyl hydrolase-like [Hyalella azteca]
TRINITY_DN11618_c0_g1_i1_6	XP_018024052.1	1.7e-42	131/404(32.43)	181	PREDICTED: uncharacterized protein LOC108679831 [Hyalella azteca]
TRINITY_DN11621_c0_g1_i1_3	KRZ00056.1	2.9e-29	61/122(50.00)	136	hypothetical protein T11_8057, partial [Trichinella zimbabwensis]
TRINITY_DN11621_c0_g1_i1_5	AWU67091.1	5.2e-74	148/316(46.84)	285	putative trypsin [Crangon crangon]
TRINITY_DN11626_c0_g1_i1_3	AKO62680.1	2.4e-207	355/366(96.99)	729	ERK [Eriocheir sinensis]
TRINITY_DN11629_c0_g1_i1_5	AAX44045.1	2.1e-07	28/28(100.00)	64	clock [Macrobrachium rosenbergii]
TRINITY_DN11630_c0_g1_i1_6	AYN63914.1	1.9e-26	55/103(53.40)	125	amine oxidase [Scylla paramamosain]
TRINITY_DN11631_c0_g1_i1_6	XP_015755213.1	6.0e-12	52/192(27.08)	79	PREDICTED: uncharacterized protein LOC107334756, partial [Acropora digitifera]
TRINITY_DN11631_c0_g1_i1_7	XP_026681802.1	3.0e-35	68/116(58.62)	155	alkylglycerol monooxygenase-like [Diaphorina citri]
TRINITY_DN11631_c0_g2_i1_7	XP_018015600.1	4.5e-50	99/199(49.75)	205	PREDICTED: alkylglycerol monooxygenase-like [Hyalella azteca]
TRINITY_DN11639_c0_g1_i1_5	XP_023228708.1	4.0e-180	312/409(76.28)	639	pleckstrin homology domain-containing family G member 5-like isoform X4 [Centruroides sculpturatus]
TRINITY_DN11643_c0_g1_i1_1	AJS14565.1	2.8e-44	77/78(98.72)	185	cysteine-rich protein [Macrobrachium nipponense]
TRINITY_DN11653_c0_g1_i1_4	XP_020634084.1	1.2e-09	40/107(37.38)	72	tigger transposable element-derived protein 1-like [Pogona vitticeps]
TRINITY_DN11655_c0_g1_i1_6	ELT91252.1	6.8e-31	72/166(43.37)	141	hypothetical protein CAPTEDRAFT_214481 [Capitella teleta]
TRINITY_DN11656_c0_g2_i1_5	XP_023719318.1	4.4e-09	43/140(30.71)	68	uncharacterized protein LOC111870919 [Cryptotermes secundus]
TRINITY_DN11657_c0_g2_i1_8	XP_018020137.1	8.5e-61	114/149(76.51)	241	PREDICTED: fibroblast growth factor 1-like [Hyalella azteca]
TRINITY_DN11658_c0_g2_i1_6	XP_023713376.1	1.4e-18	51/120(42.50)	100	carbohydrate sulfotransferase 11-like isoform X1 [Cryptotermes secundus]
TRINITY_DN11665_c0_g1_i1_6	XP_018028147.1	4.0e-65	225/283(79.51)	255	PREDICTED: LOW QUALITY PROTEIN: uncharacterized protein LOC108683348 [Hyalella azteca]
TRINITY_DN11670_c0_g1_i1_3	XP_018022495.1	7.8e-44	89/185(48.11)	184	PREDICTED: sodium/bile acid cotransporter-like isoform X1 [Hyalella azteca]
TRINITY_DN11671_c0_g1_i1_8	XP_023215306.1	4.2e-33	65/155(41.94)	148	NACHT and WD repeat domain-containing protein 2-like [Centruroides sculpturatus]
TRINITY_DN11676_c0_g1_i1_6	KZS08646.1	7.3e-61	186/629(29.57)	243	Adhesion G protein-coupled receptor L4 [Daphnia magna]
TRINITY_DN11685_c0_g1_i1_3	XP_026287718.1	3.6e-08	103/447(23.04)	68	putative inorganic phosphate cotransporter [Frankliniella occidentalis]
TRINITY_DN11688_c0_g1_i1_3	XP_015819803.1	4.9e-14	43/117(36.75)	85	PREDICTED: uncharacterized protein LOC107388682 [Nothobranchius furzeri]
TRINITY_DN11689_c0_g1_i1_5	XP_018021846.1	4.8e-82	146/237(61.60)	312	PREDICTED: uncharacterized protein LOC108678025 [Hyalella azteca]
TRINITY_DN11694_c0_g1_i1_6	KYB25159.1	1.8e-10	32/94(34.04)	72	hypothetical protein TcasGA2_TC034897 [Tribolium castaneum]
TRINITY_DN11697_c0_g1_i1_3	ELU15448.1	1.4e-135	237/336(70.54)	490	hypothetical protein CAPTEDRAFT_176376 [Capitella teleta]
TRINITY_DN11698_c0_g1_i1_3	XP_018027078.1	2.2e-06	32/67(47.76)	59	PREDICTED: CUB domain-containing protein 2-like isoform X1 [Hyalella azteca]
TRINITY_DN11698_c0_g2_i1_3	XP_018006679.1	4.0e-26	49/71(69.01)	124	PREDICTED: uncharacterized protein LOC108664576 [Hyalella azteca]
TRINITY_DN1169_c0_g1_i1_3	XP_018015098.1	2.4e-50	206/415(49.64)	207	PREDICTED: uncharacterized protein LOC108671995 [Hyalella azteca]
TRINITY_DN11701_c0_g1_i1_3	XP_022906774.1	4.5e-10	36/84(42.86)	72	uncharacterized protein LOC111418464 [Onthophagus taurus]
TRINITY_DN11701_c0_g1_i1_6	XP_018020001.1	5.7e-81	156/235(66.38)	309	PREDICTED: post-GPI attachment to proteins factor 2-like [Hyalella azteca]
TRINITY_DN11701_c0_g2_i1_1	XP_023604321.1	5.2e-56	111/149(74.50)	224	tigger transposable element-derived protein 1-like [Myotis lucifugus]
TRINITY_DN11702_c0_g1_i1_6	XP_022625776.1	2.1e-12	37/78(47.44)	79	LOW QUALITY PROTEIN: uncharacterized protein LOC111240073 [Seriola dumerili]
TRINITY_DN11705_c0_g1_i1_5	AYA62527.1	4.5e-158	317/417(76.02)	566	HMG-box superfamily class I DNA-binding protein [Penaeus vannamei]
TRINITY_DN11707_c0_g1_i1_6	XP_018028172.1	1.3e-89	166/314(52.87)	337	PREDICTED: sushi, von Willebrand factor type A, EGF and pentraxin domain-containing protein 1-like [Hyalella azteca]
TRINITY_DN11709_c0_g1_i1_5	AEU11364.1	9.4e-155	321/395(81.27)	554	Broad-complex protein isoform 6 variant 1 [Penaeus monodon]
TRINITY_DN1171_c0_g1_i1_4	XP_023333559.1	2.5e-20	59/118(50.00)	106	SET and MYND domain-containing protein 4-like [Eurytemora affinis]
TRINITY_DN11726_c0_g1_i1_4	XP_018023133.1	1.5e-06	34/88(38.64)	60	PREDICTED: protein tramtrack, beta isoform-like isoform X6 [Hyalella azteca]
TRINITY_DN1172_c0_g1_i1_8	XP_018020705.1	3.2e-25	54/63(85.71)	122	PREDICTED: uncharacterized protein LOC108677065 [Hyalella azteca]
TRINITY_DN11731_c0_g1_i1_3	XP_018020514.1	3.6e-13	53/189(28.04)	83	PREDICTED: uncharacterized protein LOC108676872 [Hyalella azteca]
TRINITY_DN11734_c0_g1_i1_3	KZS20526.1	5.6e-09	37/95(38.95)	67	Uncharacterized protein APZ42_012764 [Daphnia magna]
TRINITY_DN11734_c0_g1_i1_6	ALU86069.1	2.5e-116	203/224(90.62)	426	mitogen-activated protein kinase kinase 7 [Penaeus vannamei]
TRINITY_DN11736_c0_g1_i1_5	XP_021938807.1	1.5e-40	86/124(69.35)	172	carcinine transporter isoform X2 [Zootermopsis nevadensis]
TRINITY_DN11756_c0_g1_i1_3	KOF65512.1	1.4e-109	202/260(77.69)	403	hypothetical protein OCBIM_22015324mg [Octopus bimaculoides]
TRINITY_DN11756_c0_g1_i1_7	Q9GV46.1	4.2e-13	48/141(34.04)	82	RecName: Full=Oplophorus-luciferin 2-monooxygenase non-catalytic subunit; Flags: Precursor
TRINITY_DN11763_c0_g1_i2_6	XP_021929665.1	6.5e-32	111/314(35.35)	147	INO80 complex subunit D isoform X3 [Zootermopsis nevadensis]
TRINITY_DN11767_c0_g1_i1_3	XP_014670052.1	1.1e-17	51/111(45.95)	97	PREDICTED: uncharacterized protein LOC106811046 [Priapulus caudatus]
TRINITY_DN11770_c0_g2_i1_6	XP_026745614.1	1.6e-06	66/299(22.07)	62	zinc finger protein 569-like [Trichoplusia ni]
TRINITY_DN11773_c0_g1_i1_5	PNF23511.1	1.5e-55	132/290(45.52)	224	TAPT1-like protein [Cryptotermes secundus]
TRINITY_DN11775_c0_g1_i1_8	AXR98482.1	1.4e-60	194/309(62.78)	242	putative plasminogen activator inhibitor 1 RNA-binding protein, partial [Procambarus clarkii]
TRINITY_DN11779_c0_g1_i1_4	ELU05464.1	2.1e-10	33/52(63.46)	73	hypothetical protein CAPTEDRAFT_157510 [Capitella teleta]
TRINITY_DN1177_c0_g1_i1_1	XP_019577999.1	1.0e-41	85/126(67.46)	176	PREDICTED: stem-specific protein TSJT1-like [Rhinolophus sinicus]
TRINITY_DN11781_c0_g1_i1_6	ESO88713.1	1.5e-36	77/134(57.46)	159	hypothetical protein LOTGIDRAFT_165497 [Lottia gigantea]
TRINITY_DN11781_c0_g2_i1_6	XP_014678737.1	5.5e-15	52/145(35.86)	88	PREDICTED: uncharacterized protein LOC106818551, partial [Priapulus caudatus]
TRINITY_DN11783_c0_g1_i1_5	XP_018012468.1	4.6e-65	140/302(46.36)	256	PREDICTED: general transcription factor IIH subunit 3-like [Hyalella azteca]
TRINITY_DN11783_c0_g1_i1_6	XP_018017762.1	3.2e-20	50/63(79.37)	106	PREDICTED: transmembrane and TPR repeat-containing protein CG4050-like [Hyalella azteca]
TRINITY_DN11785_c0_g1_i1_6	XP_018022005.1	3.7e-82	171/302(56.62)	312	PREDICTED: arrestin homolog [Hyalella azteca]
TRINITY_DN11785_c0_g2_i1_6	XP_018022005.1	4.8e-44	87/126(69.05)	184	PREDICTED: arrestin homolog [Hyalella azteca]
TRINITY_DN11786_c0_g1_i1_6	XP_018016706.1	6.6e-88	190/348(54.60)	332	PREDICTED: serine-rich adhesin for platelets-like [Hyalella azteca]
TRINITY_DN1178_c0_g1_i1_5	XP_018018519.1	8.8e-11	56/155(36.13)	74	PREDICTED: uncharacterized protein LOC108675046 [Hyalella azteca]
TRINITY_DN11791_c0_g1_i1_3	BAQ54939.1	7.8e-32	74/163(45.40)	145	opsin, rhodopsin-7 like [Indolestes peregrinus]
TRINITY_DN11792_c0_g1_i1_6	BAM35674.1	1.5e-06	31/101(30.69)	59	putative reverse transcriptase [Penaeus japonicus]
TRINITY_DN11799_c0_g1_i2_5	XP_018013047.1	3.8e-112	202/376(53.72)	414	PREDICTED: uncharacterized protein LOC108670108 [Hyalella azteca]
TRINITY_DN1179_c0_g1_i1_6	XP_018018516.1	4.9e-73	127/158(80.38)	281	PREDICTED: glucose dehydrogenase [FAD, quinone]-like [Hyalella azteca]
TRINITY_DN117_c0_g1_i1_6	CEF34384.1	4.0e-07	39/181(21.55)	62	Variant Ionotropic Glutamate Receptor, partial [Coenobita clypeatus]
TRINITY_DN11802_c0_g1_i1_7	XP_005104492.1	2.5e-07	28/65(43.08)	63	PREDICTED: zinc finger protein 236-like isoform X14 [Aplysia californica]
TRINITY_DN11807_c0_g3_i1_4	XP_018016545.1	6.3e-39	88/233(37.77)	168	PREDICTED: uncharacterized protein LOC108673255 [Hyalella azteca]
TRINITY_DN11808_c0_g1_i3_2	XP_022240481.1	2.3e-09	37/70(52.86)	70	collagen alpha-1(XVIII) chain-like [Limulus polyphemus]
TRINITY_DN1181_c0_g1_i1_4	XP_018020839.1	2.5e-61	125/169(73.96)	243	PREDICTED: ligand of Numb protein X 2-like [Hyalella azteca]
TRINITY_DN1181_c0_g1_i1_6	XP_023323582.1	1.6e-17	50/125(40.00)	96	transmembrane protease serine 9-like [Eurytemora affinis]
TRINITY_DN11822_c0_g2_i1_3	PFX13388.1	6.2e-07	32/83(38.55)	62	hypothetical protein AWC38_SpisGene22526 [Stylophora pistillata]
TRINITY_DN11826_c0_g1_i1_3	XP_018018434.1	2.7e-39	118/308(38.31)	170	PREDICTED: uncharacterized protein LOC108674959 [Hyalella azteca]
TRINITY_DN11826_c0_g1_i1_6	XP_025206449.1	1.7e-18	52/88(59.09)	100	protein GVQW3-like [Melanaphis sacchari]
TRINITY_DN11826_c0_g1_i1_8	AYH52224.1	2.0e-113	194/240(80.83)	416	putative histidine decarboxylase [Homarus americanus]
TRINITY_DN11836_c0_g1_i1_5	EFV47639.1	6.3e-31	89/222(40.09)	142	KRAB-A domain-containing protein 2 [Trichinella spiralis]
TRINITY_DN11847_c0_g1_i1_3	XP_021379630.1	8.1e-13	56/158(35.44)	81	uncharacterized protein LOC110467064 [Mizuhopecten yessoensis]
TRINITY_DN11855_c0_g1_i1_7	XP_018016731.1	2.5e-99	218/321(67.91)	369	PREDICTED: homeobox protein homothorax-like, partial [Hyalella azteca]
TRINITY_DN11855_c0_g1_i1_8	XP_023311009.1	7.7e-07	43/94(45.74)	61	protein ANTAGONIST OF LIKE HETEROCHROMATIN PROTEIN 1-like [Anoplophora glabripennis]
TRINITY_DN11860_c0_g1_i1_5	XP_015196294.1	5.5e-20	51/107(47.66)	106	PREDICTED: uncharacterized protein LOC107076619 isoform X4 [Lepisosteus oculatus]
TRINITY_DN11863_c0_g1_i1_2	XP_023604321.1	3.7e-48	104/196(53.06)	199	tigger transposable element-derived protein 1-like [Myotis lucifugus]
TRINITY_DN11864_c0_g1_i1_2	XP_018020726.1	3.8e-12	40/104(38.46)	79	PREDICTED: probable ATP-dependent helicase PF08_0048 [Hyalella azteca]
TRINITY_DN11868_c0_g1_i1_5	PSN32351.1	7.7e-45	150/253(59.29)	188	hypothetical protein C0J52_21637 [Blattella germanica]
TRINITY_DN11872_c0_g1_i1_6	XP_018026041.1	5.6e-11	43/107(40.19)	75	PREDICTED: uncharacterized protein LOC108681512 isoform X2 [Hyalella azteca]
TRINITY_DN11872_c0_g2_i1_5	PSN45049.1	9.9e-138	230/310(74.19)	497	Septin-4 [Blattella germanica]
TRINITY_DN11873_c0_g1_i1_4	EFX79237.1	2.9e-48	123/323(38.08)	200	hypothetical protein DAPPUDRAFT_304949 [Daphnia pulex]
TRINITY_DN11876_c0_g1_i1_7	XP_018026754.1	1.7e-12	54/120(45.00)	79	PREDICTED: ras-related protein Rap-2b-like [Hyalella azteca]
TRINITY_DN11879_c0_g1_i1_8	XP_018024774.1	1.4e-17	50/95(52.63)	96	PREDICTED: anionic trypsin-1-like [Hyalella azteca]
TRINITY_DN1187_c0_g1_i1_6	XP_022305564.1	3.5e-15	44/85(51.76)	88	uncharacterized protein K02A2.6-like [Crassostrea virginica]
TRINITY_DN11883_c0_g1_i1_2	XP_012143818.1	9.2e-16	51/111(45.95)	90	PREDICTED: piggyBac transposable element-derived protein 4-like [Megachile rotundata]
TRINITY_DN11885_c0_g1_i1_6	EFX87698.1	3.4e-70	135/298(45.30)	272	hypothetical protein DAPPUDRAFT_306430 [Daphnia pulex]
TRINITY_DN11888_c0_g1_i1_4	XP_018010986.1	1.6e-32	72/154(46.75)	147	PREDICTED: uncharacterized protein LOC108668307 [Hyalella azteca]
TRINITY_DN11890_c0_g1_i1_6	XP_018022335.1	6.4e-27	119/467(25.48)	129	PREDICTED: uncharacterized protein LOC108678429 [Hyalella azteca]
TRINITY_DN11894_c0_g1_i1_4	ABC48600.1	1.0e-134	229/256(89.45)	487	ribosomal protein L8 [Penaeus vannamei]
TRINITY_DN11898_c0_g1_i1_6	AFI47930.1	4.6e-12	37/42(88.10)	78	L-lactate dehydrogenase isoform 2 [Penaeus vannamei]
TRINITY_DN11914_c0_g1_i1_3	XP_018019623.1	5.3e-255	446/614(72.64)	888	PREDICTED: chromosome partition protein Smc-like isoform X1 [Hyalella azteca]
TRINITY_DN11916_c0_g1_i1_5	XP_018917029.1	2.8e-13	51/152(33.55)	82	PREDICTED: protein O-linked-mannose beta-1,2-N-acetylglucosaminyltransferase 1-like [Bemisia tabaci]
TRINITY_DN11919_c0_g1_i1_6	XP_018009627.1	5.8e-38	80/148(54.05)	165	PREDICTED: uncharacterized protein LOC108667146 isoform X3 [Hyalella azteca]
TRINITY_DN1191_c0_g1_i1_6	XP_018010862.1	4.1e-08	39/120(32.50)	65	PREDICTED: uncharacterized protein LOC108668201 [Hyalella azteca]
TRINITY_DN11929_c0_g1_i1_7	XP_020780058.1	8.7e-17	66/185(35.68)	94	uncharacterized protein LOC110159790 [Boleophthalmus pectinirostris]
TRINITY_DN11930_c0_g1_i1_3	XP_018023715.1	1.1e-07	41/105(39.05)	63	PREDICTED: protein Star-like [Hyalella azteca]
TRINITY_DN11931_c0_g2_i1_5	XP_018009598.1	1.1e-20	55/91(60.44)	106	PREDICTED: mitoguardin-like [Hyalella azteca]
TRINITY_DN11941_c0_g1_i1_6	XP_018021667.1	2.1e-08	95/464(20.47)	68	PREDICTED: uncharacterized protein LOC108677874 [Hyalella azteca]
TRINITY_DN11941_c0_g1_i2_2	XP_018015228.1	1.6e-47	95/154(61.69)	197	PREDICTED: neuroligin-4, Y-linked-like [Hyalella azteca]
TRINITY_DN11943_c0_g1_i1_3	XP_018019523.1	6.1e-37	76/108(70.37)	162	PREDICTED: uncharacterized protein LOC108675989, partial [Hyalella azteca]
TRINITY_DN11946_c0_g1_i1_3	KDR23245.1	3.4e-11	34/83(40.96)	76	Protein QIL1 [Zootermopsis nevadensis]
TRINITY_DN11947_c0_g1_i1_5	XP_025109867.1	2.9e-28	71/199(35.68)	133	ubiquitin-like-conjugating enzyme ATG10 isoform X1 [Pomacea canaliculata]
TRINITY_DN11950_c0_g2_i2_4	EFX77110.1	9.1e-45	88/112(78.57)	188	hypothetical protein DAPPUDRAFT_305915 [Daphnia pulex]
TRINITY_DN11953_c0_g1_i1_4	XP_023237429.1	2.3e-18	52/133(39.10)	99	uncharacterized peptidase C1-like protein F26E4.3 [Centruroides sculpturatus]
TRINITY_DN11956_c0_g1_i1_6	XP_021369371.1	4.7e-11	40/88(45.45)	74	uncharacterized protein LOC110460656 [Mizuhopecten yessoensis]
TRINITY_DN11957_c0_g1_i1_4	EUB53836.1	4.4e-43	91/96(94.79)	181	hypothetical protein EGR_11314 [Echinococcus granulosus]
TRINITY_DN11959_c0_g1_i1_1	XP_004926598.1	4.1e-27	59/81(72.84)	129	cytochrome c oxidase subunit NDUFA4 [Bombyx mori]
TRINITY_DN11961_c0_g1_i1_6	XP_018024442.1	2.0e-13	52/115(45.22)	83	PREDICTED: uncharacterized protein LOC108680180 [Hyalella azteca]
TRINITY_DN11963_c0_g1_i1_1	XP_026465393.1	1.2e-23	54/82(65.85)	117	54S ribosomal protein c83.06c, mitochondrial [Ctenocephalides felis]
TRINITY_DN11965_c0_g1_i1_5	XP_013403245.1	5.5e-24	67/159(42.14)	118	uncharacterized protein LOC106168647 [Lingula anatina]
TRINITY_DN11968_c0_g1_i1_6	XP_013419172.2	8.4e-27	120/365(32.88)	129	putative ZDHHC-type palmitoyltransferase 5, partial [Lingula anatina]
TRINITY_DN11975_c0_g1_i1_3	ALF45198.1	1.0e-201	323/323(100.00)	710	CTLDcp2 [Macrobrachium nipponense]
TRINITY_DN11976_c0_g1_i1_6	XP_021940743.1	5.7e-36	77/143(53.85)	158	potassium voltage-gated channel subfamily H member 2 isoform X4 [Zootermopsis nevadensis]
TRINITY_DN11984_c1_g1_i1_5	XP_019905069.1	3.7e-06	54/178(30.34)	59	PREDICTED: LOW QUALITY PROTEIN: uncharacterized protein LOC105026845 [Esox lucius]
TRINITY_DN11985_c0_g1_i1_5	AYD41599.1	6.9e-40	75/106(70.75)	171	masquerade-like protein serine proteinase, partial [Procambarus clarkii]
TRINITY_DN11987_c0_g2_i1_6	XP_018006440.1	2.0e-109	304/590(51.53)	404	PREDICTED: uncharacterized protein LOC108664371 [Hyalella azteca]
TRINITY_DN11991_c0_g1_i1_6	APO14259.1	4.1e-29	74/190(38.95)	136	juvenile hormone esterase-like carboxylesterase 1 [Eriocheir sinensis]
TRINITY_DN11993_c0_g1_i1_6	XP_023334319.1	1.3e-96	165/327(50.46)	361	protein ABHD13-like [Eurytemora affinis]
TRINITY_DN11995_c0_g1_i1_2	XP_018012994.1	1.1e-115	238/447(53.24)	425	PREDICTED: general transcription factor IIE subunit 1-like [Hyalella azteca]
TRINITY_DN11995_c0_g1_i1_3	ANA91274.1	3.2e-48	120/276(43.48)	199	dual oxidase [Penaeus japonicus]
TRINITY_DN11995_c0_g1_i1_6	ACR54138.1	2.3e-35	75/80(93.75)	156	ribosomal protein L35A, partial [Palaemon varians]
TRINITY_DN11995_c0_g2_i1_3	ANA91274.1	1.7e-228	388/663(58.52)	799	dual oxidase [Penaeus japonicus]
TRINITY_DN12007_c0_g1_i4_3	XP_023716698.1	1.8e-160	311/566(54.95)	573	ubiquitin carboxyl-terminal hydrolase 32-like isoform X1 [Cryptotermes secundus]
TRINITY_DN12010_c0_g1_i1_1	PNF14198.1	1.1e-68	133/213(62.44)	268	Translocon-associated protein subunit alpha [Cryptotermes secundus]
TRINITY_DN12010_c0_g1_i1_6	AEK86518.1	1.3e-293	476/531(89.64)	1015	IKKbeta [Penaeus vannamei]
TRINITY_DN12017_c0_g1_i1_3	XP_021938792.1	3.6e-143	287/488(58.81)	515	LOW QUALITY PROTEIN: WD repeat and FYVE domain-containing protein 3-like [Zootermopsis nevadensis]
TRINITY_DN12025_c0_g1_i1_6	XP_018027296.1	3.3e-173	379/509(74.46)	615	PREDICTED: SNF-related serine/threonine-protein kinase-like [Hyalella azteca]
TRINITY_DN12029_c0_g1_i1_3	AOG14388.1	8.2e-198	349/414(84.30)	697	histamine receptor type 1 [Homarus americanus]
TRINITY_DN1202_c0_g1_i1_4	XP_022920051.1	7.3e-61	115/201(57.21)	241	carcinine transporter [Onthophagus taurus]
TRINITY_DN12034_c0_g1_i1_5	PNF33647.1	5.1e-30	92/234(39.32)	139	Coiled-coil domain-containing protein 103 [Cryptotermes secundus]
TRINITY_DN12035_c0_g1_i1_3	KZS10109.1	1.7e-92	161/359(44.85)	347	Uncharacterized protein APZ42_025501 [Daphnia magna]
TRINITY_DN12037_c0_g1_i1_6	XP_018014516.1	1.6e-09	55/179(30.73)	71	PREDICTED: bestrophin-4-like, partial [Hyalella azteca]
TRINITY_DN1203_c0_g1_i1_6	XP_018010474.1	1.4e-26	74/141(52.48)	127	PREDICTED: uncharacterized protein LOC108667885 [Hyalella azteca]
TRINITY_DN12040_c0_g1_i1_6	XP_023609224.1	8.7e-09	38/74(51.35)	67	tigger transposable element-derived protein 1 isoform X2 [Myotis lucifugus]
TRINITY_DN12042_c0_g1_i1_3	XP_018027375.1	1.1e-25	53/70(75.71)	123	PREDICTED: regulator of G-protein signaling 20-like [Hyalella azteca]
TRINITY_DN12045_c0_g1_i1_2	XP_006816667.1	4.8e-26	67/167(40.12)	125	PREDICTED: uncharacterized protein LOC102806440, partial [Saccoglossus kowalevskii]
TRINITY_DN12047_c0_g1_i1_6	XP_022238143.1	1.5e-84	160/304(52.63)	320	histamine H2 receptor-like [Limulus polyphemus]
TRINITY_DN12051_c0_g1_i1_3	XP_018026047.1	2.9e-72	139/285(48.77)	279	PREDICTED: beta-1,4-glucuronyltransferase 1-like [Hyalella azteca]
TRINITY_DN12053_c0_g1_i1_6	XP_018108349.1	7.1e-29	109/404(26.98)	136	PREDICTED: proline-serine-threonine phosphatase-interacting protein 1-like [Xenopus laevis]
TRINITY_DN12057_c0_g1_i1_6	AHN53443.1	3.1e-42	78/141(55.32)	178	reverse transcriptase, partial [Nuttalliella namaqua]
TRINITY_DN12061_c0_g1_i1_3	ELT98626.1	5.1e-27	89/284(31.34)	129	hypothetical protein CAPTEDRAFT_169490 [Capitella teleta]
TRINITY_DN12064_c0_g1_i1_2	XP_021378520.1	4.4e-16	55/147(37.41)	92	DNA repair protein XRCC2-like [Mizuhopecten yessoensis]
TRINITY_DN12066_c0_g1_i1_3	XP_016345893.1	1.4e-19	57/153(37.25)	104	PREDICTED: PR domain zinc finger protein 15-like [Sinocyclocheilus anshuiensis]
TRINITY_DN12066_c0_g2_i1_1	EJW71244.1	1.6e-07	26/28(92.86)	63	drumstick, partial [Wuchereria bancrofti]
TRINITY_DN12072_c0_g1_i1_3	XP_018804587.1	3.3e-114	205/385(53.25)	419	PREDICTED: dipeptidase 1 [Bactrocera latifrons]
TRINITY_DN12073_c0_g1_i1_6	XP_015606364.1	5.9e-49	105/199(52.76)	201	cadherin-99C isoform X1 [Cephus cinctus]
TRINITY_DN12076_c0_g1_i1_6	KRY08901.1	1.1e-95	176/308(57.14)	357	SCAN domain-containing protein 3 [Trichinella patagoniensis]
TRINITY_DN12079_c0_g1_i1_3	CAB85963.1	2.0e-270	459/916(50.11)	939	alpha glucosidase [Penaeus vannamei]
TRINITY_DN12083_c0_g1_i1_6	XP_022198289.1	5.0e-22	64/157(40.76)	113	uncharacterized protein LOC111055404 [Nilaparvata lugens]
TRINITY_DN12086_c0_g1_i1_3	XP_018011710.1	4.4e-212	358/695(51.51)	745	PREDICTED: venom phosphodiesterase 2-like [Hyalella azteca]
TRINITY_DN12086_c0_g1_i1_5	AWP20114.1	2.4e-150	259/394(65.74)	539	putative acetyl-CoA acetyltransferase cytosolic [Scophthalmus maximus]
TRINITY_DN12089_c0_g1_i1_1	PSN56389.1	2.1e-18	57/132(43.18)	99	hypothetical protein C0J52_13989 [Blattella germanica]
TRINITY_DN12089_c0_g2_i1_1	XP_023233755.1	4.8e-07	27/58(46.55)	62	beta-1,4-glucuronyltransferase 1-like [Centruroides sculpturatus]
TRINITY_DN12097_c0_g1_i1_8	XP_018023092.1	4.4e-134	257/322(79.81)	485	PREDICTED: kinesin heavy chain-like [Hyalella azteca]
TRINITY_DN12101_c0_g1_i1_6	EFN74744.1	2.7e-73	191/594(32.15)	284	THAP domain-containing protein 9, partial [Camponotus floridanus]
TRINITY_DN12105_c0_g1_i1_5	XP_021379630.1	7.7e-11	33/68(48.53)	75	uncharacterized protein LOC110467064 [Mizuhopecten yessoensis]
TRINITY_DN12107_c0_g1_i1_3	KZS19268.1	6.4e-11	31/60(51.67)	74	Disrupted in renal carcinoma protein 2 [Daphnia magna]
TRINITY_DN12110_c0_g1_i1_3	XP_019870227.1	1.6e-26	62/138(44.93)	127	PREDICTED: LOW QUALITY PROTEIN: epoxide hydrolase 4-like [Aethina tumida]
TRINITY_DN12110_c0_g2_i1_3	XP_018020392.1	3.3e-33	94/236(39.83)	150	PREDICTED: epoxide hydrolase 4-like [Hyalella azteca]
TRINITY_DN12114_c0_g1_i1_3	XP_018008760.1	2.2e-81	146/187(78.07)	309	PREDICTED: zinc finger protein castor homolog 1-like isoform X2 [Hyalella azteca]
TRINITY_DN12118_c0_g1_i1_4	XP_018027110.1	1.5e-78	161/469(34.33)	301	PREDICTED: solute carrier family 22 member 5-like [Hyalella azteca]
TRINITY_DN12122_c0_g1_i1_4	AET34915.1	1.9e-14	55/173(31.79)	88	heat shock protein 21 [Macrobrachium rosenbergii]
TRINITY_DN12128_c0_g1_i1_6	XP_012262256.1	3.0e-06	30/65(46.15)	59	protein doublesex isoform X1 [Athalia rosae]
TRINITY_DN12134_c0_g1_i1_4	KZS16808.1	9.8e-47	97/173(56.07)	195	Uncharacterized protein APZ42_017385 [Daphnia magna]
TRINITY_DN12136_c0_g1_i2_6	XP_018013100.1	4.6e-27	60/74(81.08)	129	PREDICTED: uncharacterized protein LOC108670157 isoform X1 [Hyalella azteca]
TRINITY_DN12143_c0_g1_i1_4	ABI98680.1	1.7e-104	188/199(94.47)	386	ubiquitin-conjugating enzyme H1 [Penaeus vannamei]
TRINITY_DN12150_c0_g2_i1_6	XP_018023170.1	1.9e-25	58/127(45.67)	124	PREDICTED: longitudinals lacking protein, isoforms H/M/V-like isoform X2 [Hyalella azteca]
TRINITY_DN12156_c0_g1_i1_6	XP_018008740.1	1.4e-162	292/489(59.71)	580	PREDICTED: suppressor of fused homolog [Hyalella azteca]
TRINITY_DN12159_c0_g1_i2_6	XP_018013683.1	5.7e-63	118/198(59.60)	248	PREDICTED: uncharacterized protein LOC108670704 [Hyalella azteca]
TRINITY_DN12162_c0_g1_i1_2	XP_011421341.1	3.5e-37	70/128(54.69)	161	PREDICTED: uncharacterized protein LOC105323971 [Crassostrea gigas]
TRINITY_DN12164_c0_g1_i2_6	XP_019627513.1	2.1e-55	123/212(58.02)	224	PREDICTED: mediator of RNA polymerase II transcription subunit 6-like [Branchiostoma belcheri]
TRINITY_DN12169_c0_g1_i1_6	XP_018022782.1	6.5e-301	518/827(62.64)	1040	PREDICTED: glutamine-dependent NAD(+) synthetase-like [Hyalella azteca]
TRINITY_DN12181_c0_g1_i1_4	XP_020448867.1	2.1e-42	117/293(39.93)	181	syntaxin-16 isoform X2 [Monopterus albus]
TRINITY_DN12183_c0_g1_i1_1	XP_022094234.1	4.7e-07	45/151(29.80)	62	NLR family CARD domain-containing protein 4-like isoform X1 [Acanthaster planci]
TRINITY_DN12192_c0_g1_i1_6	XP_023216517.1	3.4e-39	108/280(38.57)	170	potassium channel KOR2-like [Centruroides sculpturatus]
TRINITY_DN12193_c0_g1_i1_3	XP_018011733.1	2.3e-16	48/111(43.24)	95	PREDICTED: protein transport protein SEC31-like [Hyalella azteca]
TRINITY_DN12198_c0_g1_i1_6	ELU06597.1	9.8e-06	27/32(84.38)	58	hypothetical protein CAPTEDRAFT_181743 [Capitella teleta]
TRINITY_DN12201_c0_g1_i1_5	XP_011665173.1	5.4e-25	52/88(59.09)	120	PREDICTED: uncharacterized protein LOC763830, partial [Strongylocentrotus purpuratus]
TRINITY_DN12202_c0_g1_i1_8	EEN53119.1	4.3e-08	38/88(43.18)	65	hypothetical protein BRAFLDRAFT_76362 [Branchiostoma floridae]
TRINITY_DN12207_c0_g1_i2_6	XP_012170700.1	3.5e-19	55/138(39.86)	104	uncharacterized protein LOC100648927 isoform X1 [Bombus terrestris]
TRINITY_DN12209_c0_g1_i1_6	XP_023232197.1	9.4e-91	164/217(75.58)	340	sushi, von Willebrand factor type A, EGF and pentraxin domain-containing protein 1-like [Centruroides sculpturatus]
TRINITY_DN12212_c0_g1_i2_5	XP_018008520.1	6.7e-47	99/225(44.00)	195	PREDICTED: CDP-diacylglycerol--glycerol-3-phosphate 3-phosphatidyltransferase-like [Hyalella azteca]
TRINITY_DN12213_c0_g1_i1_4	XP_012246388.2	2.2e-17	47/76(61.84)	97	kinase D-interacting substrate of 220 kDa B isoform X2 [Bombus impatiens]
TRINITY_DN12216_c0_g1_i1_5	XP_003725052.1	1.5e-30	64/108(59.26)	139	PREDICTED: uncharacterized protein LOC100888496 [Strongylocentrotus purpuratus]
TRINITY_DN12219_c0_g1_i1_6	KFD68217.1	4.4e-70	128/252(50.79)	272	hypothetical protein M514_19699 [Trichuris suis]
TRINITY_DN12223_c0_g1_i1_3	KFM67443.1	7.7e-74	138/199(69.35)	284	Betaine--homocysteine S-methyltransferase 1, partial [Stegodyphus mimosarum]
TRINITY_DN12227_c0_g1_i1_2	XP_018007308.1	5.0e-153	288/525(54.86)	548	PREDICTED: von Willebrand factor A domain-containing protein 9-like [Hyalella azteca]
TRINITY_DN12231_c0_g1_i2_6	XP_002737149.1	2.8e-13	40/95(42.11)	82	PREDICTED: deleted in autism protein 1 homolog [Saccoglossus kowalevskii]
TRINITY_DN12232_c0_g1_i1_2	XP_014677047.1	1.6e-12	37/70(52.86)	80	PREDICTED: uncharacterized protein LOC106816918 [Priapulus caudatus]
TRINITY_DN12233_c0_g1_i1_4	XP_021946546.1	1.2e-54	97/174(55.75)	221	protein CREG2-like [Folsomia candida]
TRINITY_DN12252_c0_g1_i5_6	ANN87808.1	2.8e-193	393/449(87.53)	682	Dscam [Scylla paramamosain]
TRINITY_DN12257_c0_g1_i1_6	XP_018017573.1	1.3e-38	96/174(55.17)	167	PREDICTED: transmembrane protein 241-like isoform X2 [Hyalella azteca]
TRINITY_DN12257_c0_g2_i1_6	XP_018017572.1	3.6e-38	86/144(59.72)	166	PREDICTED: transmembrane protein 241-like isoform X1 [Hyalella azteca]
TRINITY_DN12262_c0_g1_i1_3	AHL28108.1	5.8e-222	348/489(71.17)	777	chitinase 3C [Macrobrachium nipponense]
TRINITY_DN12264_c0_g1_i1_3	XP_023380038.1	7.6e-06	38/125(30.40)	60	protein C3orf33 homolog isoform X6 [Pteropus vampyrus]
TRINITY_DN12264_c0_g1_i1_6	EDV92794.1	1.9e-32	73/146(50.00)	146	GH18955 [Drosophila grimshawi]
TRINITY_DN12267_c0_g1_i1_6	XP_025831674.1	1.7e-11	49/150(32.67)	77	eIF-2-alpha kinase GCN2 [Agrilus planipennis]
TRINITY_DN12267_c0_g2_i1_6	XP_019868585.1	1.3e-12	40/120(33.33)	80	PREDICTED: LOW QUALITY PROTEIN: eIF-2-alpha kinase GCN2 [Aethina tumida]
TRINITY_DN12269_c0_g1_i1_6	XP_018006603.1	2.7e-25	54/153(35.29)	122	PREDICTED: uncharacterized protein LOC108664518 [Hyalella azteca]
TRINITY_DN12280_c0_g1_i1_1	XP_018015412.1	3.5e-41	89/169(52.66)	175	PREDICTED: organic cation transporter protein-like [Hyalella azteca]
TRINITY_DN12282_c0_g1_i1_4	XP_018013450.1	2.4e-08	41/136(30.15)	66	PREDICTED: vascular cell adhesion protein 1-like [Hyalella azteca]
TRINITY_DN12284_c0_g1_i1_5	XP_018010855.1	5.1e-65	118/209(56.46)	255	PREDICTED: pyridine nucleotide-disulfide oxidoreductase domain-containing protein 2-like [Hyalella azteca]
TRINITY_DN12285_c0_g1_i1_4	ADI59754.1	8.8e-36	76/100(76.00)	157	early cuticle protein 6 [Callinectes sapidus]
TRINITY_DN12289_c0_g1_i1_6	AWK57537.1	4.1e-10	35/55(63.64)	72	pigment dispersing hormone 1 [Cherax quadricarinatus]
TRINITY_DN12295_c1_g1_i1_2	XP_026018603.1	2.2e-09	35/118(29.66)	69	uncharacterized protein LOC113019249 [Astatotilapia calliptera]
TRINITY_DN122_c0_g1_i2_7	XP_018011489.1	1.5e-97	177/278(63.67)	364	PREDICTED: LOW QUALITY PROTEIN: heparan sulfate glucosamine 3-O-sulfotransferase 1-like [Hyalella azteca]
TRINITY_DN12306_c0_g1_i1_2	PNF43004.1	7.2e-52	108/226(47.79)	212	Translin [Cryptotermes secundus]
TRINITY_DN12311_c0_g1_i1_3	XP_018012522.1	1.3e-10	33/71(46.48)	73	PREDICTED: protein tramtrack, beta isoform-like isoform X9 [Hyalella azteca]
TRINITY_DN12312_c0_g1_i1_4	PFX12684.1	2.9e-22	74/202(36.63)	115	hypothetical protein AWC38_SpisGene23314 [Stylophora pistillata]
TRINITY_DN12312_c0_g1_i1_5	XP_026293569.1	2.3e-10	47/96(48.96)	72	unconventional myosin-XV-like isoform X4 [Frankliniella occidentalis]
TRINITY_DN12313_c0_g1_i1_6	XP_014671796.1	9.3e-22	90/321(28.04)	112	PREDICTED: dimethyladenosine transferase 2, mitochondrial-like isoform X3 [Priapulus caudatus]
TRINITY_DN12316_c0_g1_i1_4	XP_015593312.1	1.4e-36	79/86(91.86)	160	ubiquitin-fold modifier 1 isoform X6 [Cephus cinctus]
TRINITY_DN12322_c0_g1_i1_3	XP_025754717.1	5.4e-30	66/108(61.11)	138	zinc finger MYM-type protein 1-like isoform X1 [Oreochromis niloticus]
TRINITY_DN12327_c0_g1_i1_7	XP_021933345.1	2.3e-87	170/234(72.65)	329	rap guanine nucleotide exchange factor 4 isoform X2 [Zootermopsis nevadensis]
TRINITY_DN12328_c0_g1_i1_2	XP_023708024.1	1.0e-93	175/386(45.34)	352	kelch domain-containing protein 2-like isoform X1 [Cryptotermes secundus]
TRINITY_DN12328_c1_g1_i1_6	XP_018010184.1	3.1e-25	89/312(28.53)	124	PREDICTED: uncharacterized protein LOC108667653 isoform X2 [Hyalella azteca]
TRINITY_DN1232_c0_g1_i1_5	XP_021355212.1	6.0e-10	30/68(44.12)	71	uncharacterized protein LOC110451492 [Mizuhopecten yessoensis]
TRINITY_DN12331_c0_g1_i1_7	PIK38755.1	7.3e-57	180/574(31.36)	229	putative pre-mRNA-splicing factor PRP46-like [Apostichopus japonicus]
TRINITY_DN12334_c0_g1_i1_6	XP_023215298.1	7.9e-15	34/100(34.00)	87	NACHT and WD repeat domain-containing protein 2-like [Centruroides sculpturatus]
TRINITY_DN12334_c0_g1_i2_5	PNF22356.1	6.3e-54	113/250(45.20)	218	hypothetical protein B7P43_G17501, partial [Cryptotermes secundus]
TRINITY_DN12334_c0_g2_i1_6	XP_018896890.1	1.7e-29	73/176(41.48)	136	PREDICTED: NACHT domain- and WD repeat-containing protein 1 isoform X2 [Bemisia tabaci]
TRINITY_DN12334_c0_g3_i1_6	XP_023215298.1	3.6e-28	63/113(55.75)	131	NACHT and WD repeat domain-containing protein 2-like [Centruroides sculpturatus]
TRINITY_DN12337_c0_g1_i1_1	XP_018021918.1	4.1e-51	110/192(57.29)	209	PREDICTED: dual specificity protein phosphatase 2-like [Hyalella azteca]
TRINITY_DN12342_c0_g1_i1_1	XP_018019147.1	9.2e-245	417/541(77.08)	853	PREDICTED: eukaryotic translation initiation factor 3 subunit L-like [Hyalella azteca]
TRINITY_DN12343_c0_g1_i1_6	XP_018026984.1	2.9e-34	74/104(71.15)	152	PREDICTED: uncharacterized protein LOC108682350 [Hyalella azteca]
TRINITY_DN12343_c0_g2_i1_6	XP_014341861.1	1.6e-22	56/116(48.28)	113	PREDICTED: armadillo repeat-containing protein 2 [Latimeria chalumnae]
TRINITY_DN12354_c0_g1_i1_6	XP_018010983.1	4.7e-36	90/225(40.00)	159	PREDICTED: protein Star-like isoform X1 [Hyalella azteca]
TRINITY_DN12357_c0_g1_i1_5	AJP60220.1	5.1e-48	94/94(100.00)	197	vitellogenin receptor [Macrobrachium nipponense]
TRINITY_DN12357_c0_g2_i1_5	AJP60220.1	5.6e-200	461/471(97.88)	704	vitellogenin receptor [Macrobrachium nipponense]
TRINITY_DN12363_c0_g1_i1_8	XP_026141514.1	1.6e-34	107/360(29.72)	154	carbohydrate sulfotransferase 15-like [Carassius auratus]
TRINITY_DN12363_c0_g2_i1_8	XP_021352517.1	3.5e-26	58/138(42.03)	126	carbohydrate sulfotransferase 15-like [Mizuhopecten yessoensis]
TRINITY_DN1236_c0_g1_i1_8	XP_022183320.1	7.4e-17	40/67(59.70)	94	uncharacterized protein LOC111042910 [Myzus persicae]
TRINITY_DN12370_c0_g2_i1_2	XP_783499.1	2.5e-22	56/113(49.56)	113	PREDICTED: putative nuclease HARBI1 [Strongylocentrotus purpuratus]
TRINITY_DN12377_c0_g1_i1_1	XP_018021435.1	1.8e-161	282/357(78.99)	576	PREDICTED: phosphate carrier protein, mitochondrial-like [Hyalella azteca]
TRINITY_DN12380_c0_g1_i1_5	XP_023398902.1	4.6e-07	43/143(30.07)	63	zinc finger protein 404 isoform X1 [Loxodonta africana]
TRINITY_DN12387_c0_g1_i1_7	PSN38454.1	2.6e-11	30/41(73.17)	77	hypothetical protein C0J52_15626 [Blattella germanica]
TRINITY_DN12389_c0_g1_i1_5	XP_019525770.1	6.6e-06	25/73(34.25)	60	PREDICTED: transcription factor Ouib-like isoform X1 [Aedes albopictus]
TRINITY_DN12391_c0_g1_i1_6	XP_021706541.1	1.5e-50	106/111(95.50)	206	uncharacterized protein LOC110678230 [Aedes aegypti]
TRINITY_DN12395_c0_g1_i1_8	AAC28351.1	2.4e-69	136/307(44.30)	270	cytochrome P450 [Homarus americanus]
TRINITY_DN12397_c0_g1_i1_2	XP_026276914.1	5.3e-13	48/159(30.19)	82	exonuclease mut-7 homolog isoform X1 [Frankliniella occidentalis]
TRINITY_DN12397_c0_g1_i1_7	ACO10856.1	2.0e-42	93/284(32.75)	181	Neuronal acetylcholine receptor subunit alpha-2 precursor [Caligus rogercresseyi]
TRINITY_DN12398_c0_g1_i1_6	AOG14383.1	3.2e-16	47/68(69.12)	93	cyclic nucleotide gated non-selective ion channel alpha 3 [Cancer borealis]
TRINITY_DN12400_c0_g1_i1_2	XP_017303023.1	1.3e-28	70/152(46.05)	133	uncharacterized protein LOC108253484 [Diaphorina citri]
TRINITY_DN12402_c0_g1_i1_4	AJO70001.1	2.5e-44	84/211(39.81)	187	sodium-potassium ATPase beta [Cherax destructor]
TRINITY_DN12407_c0_g1_i1_6	KZS17319.1	1.7e-32	75/186(40.32)	147	Uncharacterized protein APZ42_016912 [Daphnia magna]
TRINITY_DN12410_c0_g1_i1_6	ADG60269.1	1.1e-240	427/466(91.63)	840	G protein-coupled receptor 89 [Scylla paramamosain]
TRINITY_DN12412_c0_g1_i1_8	XP_018020501.1	1.6e-11	40/67(59.70)	78	PREDICTED: uncharacterized protein LOC108676805 isoform X10 [Hyalella azteca]
TRINITY_DN12417_c0_g1_i1_7	XP_025832570.1	1.4e-89	180/236(76.27)	337	ecto-NOX disulfide-thiol exchanger 2 [Agrilus planipennis]
TRINITY_DN12425_c0_g1_i1_3	PNF23332.1	1.7e-108	221/508(43.50)	401	putative G-protein coupled receptor CG31760, partial [Cryptotermes secundus]
TRINITY_DN12425_c0_g1_i1_6	XP_018019122.1	8.4e-09	31/51(60.78)	67	PREDICTED: uncharacterized protein LOC108675610 isoform X2 [Hyalella azteca]
TRINITY_DN12426_c0_g1_i1_5	XP_023398903.1	2.2e-06	73/260(28.08)	62	zinc finger protein 404 isoform X2 [Loxodonta africana]
TRINITY_DN12434_c0_g1_i1_1	XP_023214973.1	1.2e-41	86/108(79.63)	176	sodium/glucose cotransporter 4-like isoform X2 [Centruroides sculpturatus]
TRINITY_DN12437_c0_g2_i1_3	PIK35753.1	1.7e-11	68/245(27.76)	78	hypothetical protein BSL78_27421 [Apostichopus japonicus]
TRINITY_DN12444_c0_g1_i1_2	BAF73806.1	4.2e-35	75/100(75.00)	154	calcification associated soluble matrix protein 2 [Procambarus clarkii]
TRINITY_DN12444_c1_g1_i1_3	KYN08456.1	8.7e-08	51/163(31.29)	64	hypothetical protein ALC62_00565 [Cyphomyrmex costatus]
TRINITY_DN12446_c0_g1_i1_3	XP_018025310.1	3.2e-92	181/310(58.39)	346	PREDICTED: LOW QUALITY PROTEIN: sodium/myo-inositol cotransporter 2-like [Hyalella azteca]
TRINITY_DN12448_c0_g1_i1_5	AFU72315.1	0.0e+00	610/646(94.43)	1204	calcium-activated potassium channel transcript variant 4 [Scylla paramamosain]
TRINITY_DN1244_c0_g1_i1_1	XP_018017231.1	3.1e-215	368/605(60.83)	756	PREDICTED: dmX-like protein 2 isoform X2 [Hyalella azteca]
TRINITY_DN1244_c0_g1_i1_6	XP_018025440.1	9.2e-12	37/86(43.02)	77	PREDICTED: WASH complex subunit FAM21-like [Hyalella azteca]
TRINITY_DN12454_c0_g1_i1_6	XP_018007899.1	5.7e-16	58/69(84.06)	91	PREDICTED: uncharacterized zinc finger protein CG2678-like [Hyalella azteca]
TRINITY_DN12457_c0_g1_i1_8	XP_024141773.1	4.4e-15	45/112(40.18)	88	uncharacterized protein LOC112154824 [Oryzias melastigma]
TRINITY_DN12459_c0_g1_i1_6	XP_008203000.1	1.0e-127	216/472(45.76)	464	PREDICTED: hexosaminidase D-like [Nasonia vitripennis]
TRINITY_DN12459_c0_g1_i2_5	XP_022192716.1	1.2e-46	120/290(41.38)	195	uncharacterized protein LOC111050675 [Nilaparvata lugens]
TRINITY_DN1245_c0_g1_i1_3	XP_014774300.1	2.7e-59	118/167(70.66)	235	PREDICTED: uncharacterized protein LOC106872008 isoform X1 [Octopus bimaculoides]
TRINITY_DN12460_c0_g1_i1_3	XP_020707022.1	8.1e-47	106/312(33.97)	195	uncharacterized protein LOC105684351 [Athalia rosae]
TRINITY_DN12460_c0_g1_i2_5	XP_018025542.1	8.0e-56	130/366(35.52)	225	PREDICTED: nucleoporin Nup37-like [Hyalella azteca]
TRINITY_DN12465_c0_g1_i1_4	XP_018006863.1	7.5e-74	159/389(40.87)	285	PREDICTED: proproteinase E-like [Hyalella azteca]
TRINITY_DN12466_c0_g1_i1_6	XP_021363608.1	1.4e-07	48/150(32.00)	64	uncharacterized protein LOC110456894 [Mizuhopecten yessoensis]
TRINITY_DN12470_c0_g1_i2_3	XP_018021851.1	3.5e-33	74/97(76.29)	148	PREDICTED: optomotor-blind protein-like isoform X2 [Hyalella azteca]
TRINITY_DN12479_c0_g1_i2_6	EFX66478.1	9.8e-21	48/87(55.17)	107	hypothetical protein DAPPUDRAFT_302681 [Daphnia pulex]
TRINITY_DN12482_c0_g2_i1_7	XP_018335898.1	2.1e-13	42/92(45.65)	83	rap guanine nucleotide exchange factor 4-like isoform X5 [Agrilus planipennis]
TRINITY_DN12493_c0_g1_i1_8	KXJ10796.1	6.1e-18	53/112(47.32)	97	putative RNA-directed DNA polymerase from transposon BS [Exaiptasia pallida]
TRINITY_DN12501_c0_g1_i1_7	PNF19453.1	9.7e-10	59/197(29.95)	71	hypothetical protein B7P43_G02339, partial [Cryptotermes secundus]
TRINITY_DN12501_c0_g2_i1_3	XP_017480212.1	3.5e-10	34/109(31.19)	73	PREDICTED: uncharacterized protein LOC108369588 [Rhagoletis zephyria]
TRINITY_DN12502_c0_g1_i1_4	BAF73806.1	1.0e-31	79/133(59.40)	144	calcification associated soluble matrix protein 2 [Procambarus clarkii]
TRINITY_DN12506_c0_g1_i1_8	XP_018024622.1	1.6e-53	101/146(69.18)	217	PREDICTED: uncharacterized protein LOC108680332 [Hyalella azteca]
TRINITY_DN12507_c0_g1_i1_8	XP_019576547.1	1.1e-178	280/327(85.63)	633	PREDICTED: catalase-2 [Rhinolophus sinicus]
TRINITY_DN12510_c0_g1_i1_8	XP_023713651.1	1.6e-50	97/144(67.36)	206	trafficking protein particle complex subunit 1 [Cryptotermes secundus]
TRINITY_DN12512_c0_g1_i1_6	XP_018008867.1	1.6e-62	114/169(67.46)	246	PREDICTED: Bardet-Biedl syndrome 7 protein homolog [Hyalella azteca]
TRINITY_DN12515_c0_g1_i1_5	XP_018020050.1	3.0e-22	98/374(26.20)	114	PREDICTED: uncharacterized protein LOC108676481 [Hyalella azteca]
TRINITY_DN12517_c0_g1_i1_3	XP_018026047.1	2.0e-13	49/142(34.51)	83	PREDICTED: beta-1,4-glucuronyltransferase 1-like [Hyalella azteca]
TRINITY_DN12518_c0_g1_i1_6	AEN94569.1	5.0e-28	71/197(36.04)	132	tetraspanin [Scylla paramamosain]
TRINITY_DN12521_c0_g1_i1_3	ADB44903.1	4.5e-49	95/96(98.96)	203	peritrophin [Macrobrachium nipponense]
TRINITY_DN12525_c0_g1_i1_1	XP_025086818.1	1.4e-22	53/94(56.38)	113	general transcription factor II-I repeat domain-containing protein 2B-like [Pomacea canaliculata]
TRINITY_DN12525_c0_g1_i1_2	XP_018014621.1	3.2e-15	55/113(48.67)	89	PREDICTED: protein FAM32A-like [Hyalella azteca]
TRINITY_DN12525_c0_g2_i1_6	XP_022250700.1	2.6e-08	55/200(27.50)	67	golgin subfamily A member 4-like [Limulus polyphemus]
TRINITY_DN12530_c0_g1_i1_6	XP_018013645.1	1.4e-39	81/154(52.60)	170	PREDICTED: methyltransferase-like protein 7A [Hyalella azteca]
TRINITY_DN12533_c0_g1_i1_2	XP_018024357.1	2.9e-17	78/203(38.42)	96	PREDICTED: uncharacterized protein LOC108680112 [Hyalella azteca]
TRINITY_DN12533_c0_g1_i1_6	XP_015776012.1	6.3e-10	45/114(39.47)	73	PREDICTED: uncharacterized protein LOC107354104 [Acropora digitifera]
TRINITY_DN12533_c0_g2_i1_1	XP_011472311.1	2.5e-27	72/163(44.17)	129	peroxisomal membrane protein 11C isoform X2 [Oryzias latipes]
TRINITY_DN12540_c0_g1_i1_5	XP_022258117.1	7.4e-22	52/114(45.61)	111	vasopressin V1b receptor-like [Limulus polyphemus]
TRINITY_DN12542_c0_g1_i1_2	XP_018018961.1	4.6e-142	282/604(46.69)	512	PREDICTED: solute carrier family 13 member 5-like isoform X1 [Hyalella azteca]
TRINITY_DN12542_c0_g2_i1_1	XP_014788096.1	1.3e-31	76/122(62.30)	143	PREDICTED: copine-8-like, partial [Octopus bimaculoides]
TRINITY_DN12543_c0_g2_i1_6	XP_026080087.1	2.7e-07	34/82(41.46)	64	WASH complex subunit 2-like isoform X1 [Carassius auratus]
TRINITY_DN12545_c0_g1_i1_8	XP_022235414.1	8.2e-06	43/180(23.89)	58	uncharacterized protein LOC111083293 [Limulus polyphemus]
TRINITY_DN12548_c0_g1_i1_5	XP_019621937.1	1.3e-15	42/96(43.75)	90	PREDICTED: piggyBac transposable element-derived protein 4-like isoform X1 [Branchiostoma belcheri]
TRINITY_DN12549_c0_g1_i1_4	ANT96500.1	4.2e-11	34/41(82.93)	75	gonadotropin-releasing hormone short-isoform precursor [Macrobrachium rosenbergii]
TRINITY_DN12552_c0_g1_i1_3	XP_018015404.1	1.7e-22	47/82(57.32)	114	PREDICTED: uncharacterized protein LOC108672276 [Hyalella azteca]
TRINITY_DN12553_c0_g1_i1_3	XP_023293545.1	8.1e-29	73/150(48.67)	134	probable 28S ribosomal protein S23, mitochondrial [Lucilia cuprina]
TRINITY_DN12553_c0_g1_i1_7	ESO93471.1	2.2e-22	58/136(42.65)	113	hypothetical protein LOTGIDRAFT_175538 [Lottia gigantea]
TRINITY_DN12553_c0_g1_i1_8	XP_018011013.1	4.8e-32	64/100(64.00)	144	PREDICTED: uncharacterized protein LOC108668336 [Hyalella azteca]
TRINITY_DN12556_c0_g1_i3_5	ARK36625.1	1.2e-36	87/143(60.84)	161	relaxin-receptor 1 [Sagmariasus verreauxi]
TRINITY_DN12556_c0_g2_i1_5	ARK36625.1	4.3e-60	110/143(76.92)	238	relaxin-receptor 1 [Sagmariasus verreauxi]
TRINITY_DN12557_c0_g1_i4_6	AFO68119.1	1.4e-06	27/65(41.54)	61	tachylectin [Macrobrachium rosenbergii]
TRINITY_DN12559_c0_g1_i1_1	XP_020502031.1	1.3e-67	141/254(55.51)	264	enoyl-CoA delta isomerase 2, mitochondrial [Labrus bergylta]
TRINITY_DN12561_c0_g1_i1_6	XP_025088774.1	6.3e-89	164/286(57.34)	335	pirin-like isoform X2 [Pomacea canaliculata]
TRINITY_DN12562_c0_g1_i1_6	XP_018013839.1	1.4e-20	53/145(36.55)	107	PREDICTED: uncharacterized protein LOC108670860, partial [Hyalella azteca]
TRINITY_DN12562_c0_g2_i1_1	XP_018015228.1	2.9e-40	112/191(58.64)	172	PREDICTED: neuroligin-4, Y-linked-like [Hyalella azteca]
TRINITY_DN12562_c0_g2_i1_6	XP_018017133.1	6.1e-09	37/112(33.04)	67	PREDICTED: uncharacterized protein LOC108673774 [Hyalella azteca]
TRINITY_DN12563_c0_g1_i1_4	XP_023217450.1	5.1e-10	35/73(47.95)	72	venom protein 302-like [Centruroides sculpturatus]
TRINITY_DN12565_c0_g1_i2_4	AEB54627.1	2.1e-65	130/154(84.42)	256	trap [Procambarus clarkii]
TRINITY_DN12567_c0_g1_i2_3	XP_018024691.1	4.5e-123	208/333(62.46)	449	PREDICTED: uncharacterized protein LOC108680392 [Hyalella azteca]
TRINITY_DN12568_c0_g1_i1_2	XP_024871166.1	3.2e-26	67/165(40.61)	126	uncharacterized protein LOC112454162 [Temnothorax curvispinosus]
TRINITY_DN1256_c0_g1_i1_2	XP_018026787.1	4.2e-175	423/727(58.18)	622	PREDICTED: merlin-like [Hyalella azteca]
TRINITY_DN12578_c0_g1_i1_3	XP_018010855.1	1.7e-86	163/270(60.37)	326	PREDICTED: pyridine nucleotide-disulfide oxidoreductase domain-containing protein 2-like [Hyalella azteca]
TRINITY_DN12580_c0_g1_i1_1	XP_019621922.1	1.4e-55	117/230(50.87)	223	PREDICTED: piggyBac transposable element-derived protein 4-like [Branchiostoma belcheri]
TRINITY_DN12587_c0_g1_i1_6	XP_022197575.1	5.5e-58	117/180(65.00)	232	phosphatidylglycerophosphatase and protein-tyrosine phosphatase 1 [Nilaparvata lugens]
TRINITY_DN12589_c0_g1_i1_3	XP_018026036.1	8.7e-28	63/117(53.85)	131	PREDICTED: nucleoplasmin-like protein ANO39 isoform X1 [Hyalella azteca]
TRINITY_DN1258_c0_g1_i1_6	API81626.1	5.9e-22	65/108(60.19)	110	nicotinic acetylcholine receptor alpha 5 [Homarus americanus]
TRINITY_DN1258_c0_g1_i1_7	XP_018010562.1	1.7e-33	86/157(54.78)	149	PREDICTED: vacuolar protein sorting-associated protein 13D-like [Hyalella azteca]
TRINITY_DN12591_c0_g1_i1_3	ALC78849.1	4.3e-164	261/406(64.29)	585	acid phosphatase [Penaeus vannamei]
TRINITY_DN12593_c0_g1_i2_1	XP_026277208.1	2.2e-07	31/58(53.45)	63	uncharacterized protein LOC113205707 [Frankliniella occidentalis]
TRINITY_DN12594_c0_g1_i1_3	XP_022107053.1	4.6e-113	201/332(60.54)	415	probable E3 ubiquitin-protein ligase HERC1 [Acanthaster planci]
TRINITY_DN12595_c0_g1_i1_6	PIK61334.1	6.8e-19	64/242(26.45)	102	hypothetical protein BSL78_01754 [Apostichopus japonicus]
TRINITY_DN12600_c0_g1_i2_3	EEN57299.1	3.5e-200	338/513(65.89)	705	hypothetical protein BRAFLDRAFT_224325 [Branchiostoma floridae]
TRINITY_DN12606_c0_g1_i1_3	PSN32797.1	3.3e-54	100/178(56.18)	219	putative signal peptidase complex subunit 2 [Blattella germanica]
TRINITY_DN12608_c0_g2_i1_1	XP_018007256.1	4.4e-50	103/145(71.03)	204	PREDICTED: GTP-binding protein RAD-like [Hyalella azteca]
TRINITY_DN12613_c0_g1_i2_3	XP_018009317.1	1.4e-87	263/444(59.23)	332	PREDICTED: longitudinals lacking protein, isoforms H/M/V-like isoform X4 [Hyalella azteca]
TRINITY_DN12616_c0_g1_i1_6	XP_018027571.1	1.8e-86	172/375(45.87)	327	PREDICTED: UPF0489 protein C5orf22 homolog [Hyalella azteca]
TRINITY_DN1261_c0_g1_i1_6	XP_004917635.1	1.9e-10	32/66(48.48)	72	PREDICTED: uncharacterized protein LOC101731903 [Xenopus tropicalis]
TRINITY_DN12620_c0_g1_i1_6	PBC28930.1	1.7e-44	82/165(49.70)	187	UNC93 protein [Apis cerana cerana]
TRINITY_DN12627_c0_g1_i1_7	KOF75604.1	3.8e-20	48/88(54.55)	105	hypothetical protein OCBIM_22034476mg [Octopus bimaculoides]
TRINITY_DN12630_c0_g1_i1_8	XP_018022749.1	2.1e-08	39/96(40.62)	65	PREDICTED: urea transporter 2-like [Hyalella azteca]
TRINITY_DN12632_c0_g1_i1_1	XP_018580182.1	2.5e-75	134/216(62.04)	290	beta-1,4-glucuronyltransferase 1 isoform X1 [Anoplophora glabripennis]
TRINITY_DN12635_c0_g1_i1_3	XP_018026189.1	1.7e-85	147/217(67.74)	325	PREDICTED: trithorax group protein osa-like [Hyalella azteca]
TRINITY_DN12641_c0_g1_i1_6	XP_011309128.1	1.1e-47	220/790(27.85)	199	PREDICTED: uncharacterized protein LOC105270112 isoform X3 [Fopius arisanus]
TRINITY_DN12654_c0_g1_i1_1	ADM45311.1	4.8e-11	39/139(28.06)	75	caspase [Eriocheir sinensis]
TRINITY_DN12654_c0_g1_i1_2	EFX84472.1	4.2e-35	82/193(42.49)	156	hypothetical protein DAPPUDRAFT_314805 [Daphnia pulex]
TRINITY_DN12656_c0_g1_i1_8	AGN98124.1	6.0e-50	179/184(97.28)	205	heat shock protein [Penaeus monodon]
TRINITY_DN12658_c0_g1_i1_1	XP_018007198.1	5.1e-43	98/215(45.58)	183	PREDICTED: coiled-coil domain-containing protein 134-like [Hyalella azteca]
TRINITY_DN1265_c0_g1_i1_3	EDS33735.1	2.1e-10	32/62(51.61)	72	conserved hypothetical protein [Culex quinquefasciatus]
TRINITY_DN12667_c0_g1_i1_8	ACO11169.1	4.0e-55	104/142(73.24)	222	RING finger protein 11 [Caligus rogercresseyi]
TRINITY_DN12667_c0_g2_i1_6	XP_018008520.1	1.1e-47	95/210(45.24)	197	PREDICTED: CDP-diacylglycerol--glycerol-3-phosphate 3-phosphatidyltransferase-like [Hyalella azteca]
TRINITY_DN12669_c0_g1_i1_2	XP_026751074.1	1.1e-18	49/70(70.00)	100	protein PET117 homolog, mitochondrial [Galleria mellonella]
TRINITY_DN12671_c0_g1_i1_3	XP_018011092.1	4.7e-286	523/781(66.97)	991	PREDICTED: delta-1-pyrroline-5-carboxylate synthase-like [Hyalella azteca]
TRINITY_DN12677_c0_g2_i1_6	XP_023227365.1	2.9e-18	53/123(43.09)	99	uncharacterized protein LOC111627916 [Centruroides sculpturatus]
TRINITY_DN12678_c0_g1_i1_4	XP_006123994.1	3.4e-28	77/191(40.31)	132	tigger transposable element-derived protein 1-like [Pelodiscus sinensis]
TRINITY_DN12678_c0_g1_i2_8	XP_023244864.1	1.0e-18	61/175(34.86)	100	uncharacterized protein LOC111642717, partial [Centruroides sculpturatus]
TRINITY_DN12678_c1_g1_i1_4	XP_006123994.1	3.8e-32	104/247(42.11)	146	tigger transposable element-derived protein 1-like [Pelodiscus sinensis]
TRINITY_DN12679_c0_g1_i1_8	CAJ17232.1	7.2e-60	136/233(58.37)	238	ribosomal protein L6e, partial [Carabus granulatus]
TRINITY_DN12681_c0_g1_i1_3	XP_018015253.1	3.6e-28	63/107(58.88)	133	PREDICTED: protein aveugle-like [Hyalella azteca]
TRINITY_DN12687_c0_g1_i1_2	EFX81993.1	6.8e-71	139/184(75.54)	275	hypothetical protein DAPPUDRAFT_210921 [Daphnia pulex]
TRINITY_DN1268_c0_g1_i1_3	XP_018010577.1	3.6e-23	54/116(46.55)	115	PREDICTED: elongation of very long chain fatty acids protein 6-like isoform X3 [Hyalella azteca]
TRINITY_DN1268_c0_g1_i1_8	XP_012940157.1	2.4e-06	38/90(42.22)	59	PREDICTED: ankyrin-2-like [Aplysia californica]
TRINITY_DN12695_c0_g1_i1_3	XP_002402574.1	1.1e-92	197/511(38.55)	348	diphthamide biosynthesis protein, putative [Ixodes scapularis]
TRINITY_DN12696_c0_g1_i1_6	KOX76026.1	9.6e-13	41/56(73.21)	80	hypothetical protein WN51_12513 [Melipona quadrifasciata]
TRINITY_DN12696_c0_g2_i1_6	XP_014771883.1	1.2e-26	63/100(63.00)	127	PREDICTED: uncharacterized protein LOC106870361 [Octopus bimaculoides]
TRINITY_DN12698_c0_g1_i4_3	XP_018028172.1	1.1e-68	128/313(40.89)	268	PREDICTED: sushi, von Willebrand factor type A, EGF and pentraxin domain-containing protein 1-like [Hyalella azteca]
TRINITY_DN12700_c0_g1_i2_3	XP_018006493.1	5.0e-37	81/177(45.76)	161	PREDICTED: sialin-like [Hyalella azteca]
TRINITY_DN12701_c0_g1_i1_2	XP_009917077.1	1.3e-33	72/79(91.14)	149	PREDICTED: elongation factor 1-alpha 1, partial [Haliaeetus albicilla]
TRINITY_DN12707_c0_g1_i1_2	XP_023215384.1	2.4e-100	193/347(55.62)	373	geranylgeranyl transferase type-1 subunit beta-like [Centruroides sculpturatus]
TRINITY_DN12711_c0_g1_i1_6	XP_013073114.1	3.3e-96	170/207(82.13)	358	PREDICTED: 5-oxoprolinase-like [Biomphalaria glabrata]
TRINITY_DN12717_c0_g1_i1_5	KFD62428.1	6.5e-15	50/120(41.67)	88	hypothetical protein M514_00871 [Trichuris suis]
TRINITY_DN12723_c0_g1_i1_2	KZS05748.1	2.2e-61	167/509(32.81)	244	Separase/extra spindle poles I-like protein [Daphnia magna]
TRINITY_DN12723_c0_g1_i1_5	PIK42952.1	2.6e-17	47/106(44.34)	95	hypothetical protein BSL78_20195 [Apostichopus japonicus]
TRINITY_DN12725_c0_g1_i2_6	XP_002429922.1	1.1e-69	129/195(66.15)	271	maintenance of killer 16 mak16, protein, putative [Pediculus humanus corporis]
TRINITY_DN1272_c0_g1_i2_1	ARS88259.1	3.8e-32	73/100(73.00)	145	ATP binding cassette transporter 3 [Penaeus vannamei]
TRINITY_DN12730_c0_g1_i1_8	XP_018012741.1	6.5e-199	355/404(87.87)	701	PREDICTED: ELAV-like protein 1 isoform X3 [Hyalella azteca]
TRINITY_DN12734_c0_g1_i1_2	PSN36077.1	9.9e-154	294/463(63.50)	551	CCR4-NOT transcription complex subunit 11 [Blattella germanica]
TRINITY_DN12739_c0_g1_i1_4	AUM60049.1	3.0e-30	71/134(52.99)	139	cuticle protein AMP13.4 [Penaeus vannamei]
TRINITY_DN12744_c0_g1_i1_5	XP_017773545.1	4.5e-08	44/129(34.11)	66	PREDICTED: putative ferric-chelate reductase 1 homolog [Nicrophorus vespilloides]
TRINITY_DN12748_c0_g1_i1_2	XP_022330021.1	6.7e-39	109/313(34.82)	168	uncharacterized protein LOC111128597 [Crassostrea virginica]
TRINITY_DN12748_c0_g2_i1_2	XP_011614612.1	5.2e-08	31/81(38.27)	65	PREDICTED: uncharacterized protein LOC105418111 [Takifugu rubripes]
TRINITY_DN12752_c0_g1_i1_1	KZS06889.1	5.4e-10	30/48(62.50)	71	Uncharacterized protein APZ42_029410 [Daphnia magna]
TRINITY_DN12755_c0_g1_i1_2	XP_018020778.1	2.9e-132	220/339(64.90)	479	PREDICTED: xylose isomerase-like [Hyalella azteca]
TRINITY_DN12755_c0_g1_i1_6	XP_018012019.1	9.3e-12	35/45(77.78)	77	PREDICTED: uncharacterized protein LOC108669226 [Hyalella azteca]
TRINITY_DN12755_c0_g2_i1_6	XP_018012019.1	3.5e-11	88/257(34.24)	76	PREDICTED: uncharacterized protein LOC108669226 [Hyalella azteca]
TRINITY_DN12757_c1_g1_i1_5	PIK33460.1	2.5e-45	82/149(55.03)	189	hypothetical protein BSL78_29725 [Apostichopus japonicus]
TRINITY_DN12758_c0_g2_i1_3	XP_009057241.1	6.9e-68	128/216(59.26)	264	hypothetical protein LOTGIDRAFT_121554 [Lottia gigantea]
TRINITY_DN12761_c0_g1_i1_5	XP_013108427.1	1.7e-22	69/177(38.98)	114	PREDICTED: probable 28S ribosomal protein S26, mitochondrial [Stomoxys calcitrans]
TRINITY_DN12771_c0_g1_i1_6	PNF18914.1	1.4e-70	139/316(43.99)	274	hypothetical protein B7P43_G01381 [Cryptotermes secundus]
TRINITY_DN12772_c0_g1_i1_2	XP_023711218.1	4.8e-44	91/200(45.50)	187	mitotic spindle assembly checkpoint protein MAD2B [Cryptotermes secundus]
TRINITY_DN12772_c0_g2_i3_5	XP_021928145.1	5.0e-148	269/486(55.35)	532	transmembrane protein 145-like [Zootermopsis nevadensis]
TRINITY_DN12773_c0_g1_i1_7	XP_020608122.1	5.1e-11	71/259(27.41)	76	probable serine/threonine-protein kinase DDB_G0280461 [Orbicella faveolata]
TRINITY_DN12776_c0_g1_i1_6	XP_018018467.1	8.5e-19	51/84(60.71)	101	PREDICTED: larval cuticle protein LCP-22-like [Hyalella azteca]
TRINITY_DN12777_c0_g1_i1_6	XP_019773449.1	2.8e-54	126/217(58.06)	219	PREDICTED: zinc finger CCHC-type and RNA-binding motif-containing protein 1-like [Dendroctonus ponderosae]
TRINITY_DN12789_c0_g1_i1_7	EFX87697.1	6.4e-178	291/416(69.95)	631	hypothetical protein DAPPUDRAFT_306563 [Daphnia pulex]
TRINITY_DN12793_c0_g2_i1_8	XP_018012290.1	1.8e-19	62/161(38.51)	103	PREDICTED: protein turtle homolog A-like [Hyalella azteca]
TRINITY_DN12794_c0_g1_i2_6	XP_011141485.1	1.9e-33	69/92(75.00)	149	60S ribosomal protein L37a [Harpegnathos saltator]
TRINITY_DN12797_c0_g1_i1_4	XP_018008279.1	6.6e-216	412/795(51.82)	758	PREDICTED: calcium-activated chloride channel regulator 2-like [Hyalella azteca]
TRINITY_DN12798_c0_g1_i1_5	XP_018008279.1	9.9e-42	87/185(47.03)	177	PREDICTED: calcium-activated chloride channel regulator 2-like [Hyalella azteca]
TRINITY_DN12801_c0_g1_i1_5	XP_014248464.1	2.6e-42	97/261(37.16)	179	protein O-linked-mannose beta-1,2-N-acetylglucosaminyltransferase 1-like [Cimex lectularius]
TRINITY_DN12806_c0_g1_i1_5	AAH91744.1	1.0e-97	179/180(99.44)	364	Major urinary protein 1 [Mus musculus]
TRINITY_DN12806_c0_g1_i1_8	ELU04621.1	8.6e-13	66/250(26.40)	82	hypothetical protein CAPTEDRAFT_222921 [Capitella teleta]
TRINITY_DN12807_c0_g1_i1_8	XP_018019909.1	2.8e-43	102/148(68.92)	182	PREDICTED: uncharacterized protein LOC108676354 [Hyalella azteca]
TRINITY_DN12811_c1_g1_i1_5	KFM64238.1	1.1e-10	34/81(41.98)	73	RNA-directed DNA polymerase from mobile element jockey, partial [Stegodyphus mimosarum]
TRINITY_DN12813_c0_g1_i1_3	PSN44320.1	1.2e-58	156/432(36.11)	235	hypothetical protein C0J52_09281 [Blattella germanica]
TRINITY_DN12814_c0_g1_i1_4	XP_018021846.1	4.7e-06	30/77(38.96)	58	PREDICTED: uncharacterized protein LOC108678025 [Hyalella azteca]
TRINITY_DN12820_c0_g1_i1_6	XP_018026737.1	6.8e-112	385/782(49.23)	412	PREDICTED: zinc finger protein basonuclin-1-like [Hyalella azteca]
TRINITY_DN12822_c0_g1_i1_7	XP_013142770.1	2.4e-73	138/197(70.05)	283	PREDICTED: rRNA-processing protein FCF1 homolog [Papilio polytes]
TRINITY_DN12828_c0_g1_i1_1	APC26108.1	8.0e-30	64/129(49.61)	137	metabotropic glutamate receptor type 1, partial [Cancer borealis]
TRINITY_DN12828_c0_g1_i1_2	AYH52222.1	1.5e-20	48/95(50.53)	107	putative nitric oxide synthase [Homarus americanus]
TRINITY_DN12831_c0_g1_i2_2	XP_018016935.1	1.9e-88	174/198(87.88)	333	PREDICTED: 40S ribosomal protein S5 [Hyalella azteca]
TRINITY_DN12832_c0_g1_i1_5	AWM95782.1	1.7e-52	111/146(76.03)	214	type 1 phosphodiesterase [Penaeus vannamei]
TRINITY_DN12832_c0_g2_i1_6	XP_011669444.1	2.8e-20	59/96(61.46)	105	PREDICTED: uncharacterized protein LOC105440699 [Strongylocentrotus purpuratus]
TRINITY_DN12835_c0_g1_i1_5	XP_023229260.1	2.7e-64	126/249(50.60)	253	uncharacterized protein LOC111629586 [Centruroides sculpturatus]
TRINITY_DN12840_c0_g1_i1_3	XP_012136746.1	1.4e-14	49/159(30.82)	87	PREDICTED: uncharacterized protein LOC100878441 isoform X1 [Megachile rotundata]
TRINITY_DN12841_c0_g1_i1_3	XP_023707883.1	2.0e-26	58/114(50.88)	125	uncharacterized protein LOC111864685 isoform X2 [Cryptotermes secundus]
TRINITY_DN12842_c0_g1_i1_2	XP_018023048.1	3.3e-84	149/256(58.20)	319	PREDICTED: cysteine and glycine-rich protein 1-like [Hyalella azteca]
TRINITY_DN12842_c0_g1_i1_6	XP_013062134.1	1.2e-24	82/238(34.45)	122	PREDICTED: uncharacterized protein LOC106051495 [Biomphalaria glabrata]
TRINITY_DN12850_c0_g1_i1_5	PAA77821.1	7.8e-13	38/81(46.91)	82	hypothetical protein BOX15_Mlig032886g3 [Macrostomum lignano]
TRINITY_DN12851_c0_g2_i1_7	ANH79230.1	3.1e-88	172/248(69.35)	332	VLIG1 [Macrobrachium rosenbergii]
TRINITY_DN12855_c0_g1_i1_3	AKS48286.1	2.2e-47	97/220(44.09)	196	gamma-interferon induced thiol reductase GILT3 [Scylla paramamosain]
TRINITY_DN12855_c0_g1_i1_7	XP_015763782.1	6.7e-33	103/308(33.44)	149	PREDICTED: uncharacterized protein LOC107342790 [Acropora digitifera]
TRINITY_DN1285_c0_g1_i1_6	XP_009043892.1	3.4e-63	136/334(40.72)	249	hypothetical protein LOTGIDRAFT_181193, partial [Lottia gigantea]
TRINITY_DN12862_c0_g1_i1_1	KDR19052.1	4.3e-49	96/125(76.80)	202	Mitogen-activated protein-binding protein-interacting protein [Zootermopsis nevadensis]
TRINITY_DN12862_c0_g1_i1_5	XP_021355721.1	2.0e-16	59/189(31.22)	94	uncharacterized protein LOC110451837 [Mizuhopecten yessoensis]
TRINITY_DN12862_c0_g2_i1_4	XP_023229260.1	3.1e-21	56/143(39.16)	109	uncharacterized protein LOC111629586 [Centruroides sculpturatus]
TRINITY_DN12863_c0_g1_i2_8	XP_018022344.1	2.8e-174	286/424(67.45)	619	PREDICTED: TRPL translocation defect protein 14-like isoform X2 [Hyalella azteca]
TRINITY_DN12870_c0_g1_i1_1	XP_025093240.1	5.8e-175	285/445(64.04)	621	tubulin alpha chain, testis-specific-like [Pomacea canaliculata]
TRINITY_DN12872_c0_g1_i2_3	XP_025409827.1	1.6e-181	287/449(63.92)	644	tyrosine-protein kinase Src42A [Sipha flava]
TRINITY_DN12874_c0_g1_i2_6	BAO01185.1	2.1e-38	76/107(71.03)	167	TNFRSF [Penaeus japonicus]
TRINITY_DN12878_c0_g1_i1_2	XP_013889122.1	1.1e-25	58/115(50.43)	123	PREDICTED: uncharacterized protein LOC106536397, partial [Austrofundulus limnaeus]
TRINITY_DN12878_c0_g1_i1_5	XP_019637278.1	1.5e-10	41/93(44.09)	74	PREDICTED: uncharacterized protein LOC109479730 [Branchiostoma belcheri]
TRINITY_DN12879_c0_g1_i1_3	AFU72314.1	1.3e-261	463/486(95.27)	909	calcium-activated potassium channel transcript variant 3 [Scylla paramamosain]
TRINITY_DN12881_c0_g1_i1_6	XP_023723533.1	1.5e-275	516/735(70.20)	956	paraplegin isoform X1 [Cryptotermes secundus]
TRINITY_DN12882_c0_g1_i3_4	XP_018331346.1	9.3e-16	61/134(45.52)	92	uncharacterized protein LOC108741158 isoform X1 [Agrilus planipennis]
TRINITY_DN12884_c0_g1_i1_5	XP_013793734.2	2.2e-18	49/73(67.12)	99	uncharacterized protein LOC106477747 [Limulus polyphemus]
TRINITY_DN12884_c0_g1_i1_6	EAT40162.1	5.2e-158	255/339(75.22)	565	AAEL008084-PA [Aedes aegypti]
TRINITY_DN12888_c0_g1_i1_6	XP_018017133.1	2.8e-20	56/157(35.67)	105	PREDICTED: uncharacterized protein LOC108673774 [Hyalella azteca]
TRINITY_DN12888_c0_g2_i1_6	XP_018012684.1	5.1e-09	44/165(26.67)	68	PREDICTED: uncharacterized protein LOC108669786 [Hyalella azteca]
TRINITY_DN12889_c0_g1_i1_3	AHL84105.1	5.3e-112	201/248(81.05)	411	F0-ATP synthase b-chain [Penaeus vannamei]
TRINITY_DN12896_c0_g1_i1_7	XP_006813540.1	7.0e-06	41/110(37.27)	58	PREDICTED: uncharacterized protein LOC102806387, partial [Saccoglossus kowalevskii]
TRINITY_DN12897_c0_g1_i1_1	KRX12216.1	1.8e-15	40/64(62.50)	89	Non-specific lipid-transfer protein [Trichinella nelsoni]
TRINITY_DN12902_c0_g1_i1_6	RJW64666.1	3.9e-07	27/60(45.00)	62	hypothetical protein CSKR_7249s [Clonorchis sinensis]
TRINITY_DN12903_c0_g1_i1_6	XP_011298983.1	1.1e-46	176/581(30.29)	196	PREDICTED: protein jim lovell-like isoform X9 [Fopius arisanus]
TRINITY_DN12904_c0_g2_i2_3	XP_018017251.1	6.0e-54	146/261(55.94)	218	PREDICTED: transient receptor potential-gamma protein-like [Hyalella azteca]
TRINITY_DN12905_c0_g1_i1_2	KDR10022.1	1.2e-24	72/201(35.82)	123	Zinc finger CCCH domain-containing protein 10 [Zootermopsis nevadensis]
TRINITY_DN12907_c0_g1_i1_8	XP_021346938.1	3.8e-12	36/55(65.45)	78	uncharacterized protein LOC110446222, partial [Mizuhopecten yessoensis]
TRINITY_DN12908_c0_g1_i1_6	XP_023721466.1	1.4e-18	58/149(38.93)	100	lysoplasmalogenase-like protein TMEM86A isoform X1 [Cryptotermes secundus]
TRINITY_DN12915_c0_g1_i1_1	KFM72725.1	6.1e-74	119/221(53.85)	286	Hemicentin-1, partial [Stegodyphus mimosarum]
TRINITY_DN12918_c0_g1_i1_6	XP_021355212.1	1.2e-32	73/169(43.20)	147	uncharacterized protein LOC110451492 [Mizuhopecten yessoensis]
TRINITY_DN12923_c0_g1_i1_7	XP_019541121.1	5.0e-102	202/382(52.88)	379	PREDICTED: 28S ribosomal protein S9, mitochondrial-like [Aedes albopictus]
TRINITY_DN12928_c0_g2_i1_1	XP_018016996.1	5.3e-16	68/168(40.48)	93	PREDICTED: uncharacterized protein LOC108673648 [Hyalella azteca]
TRINITY_DN12929_c0_g1_i1_8	XP_021927901.1	1.2e-31	85/171(49.71)	144	GTP-binding protein REM 1 [Zootermopsis nevadensis]
TRINITY_DN12930_c0_g1_i2_6	XP_018020652.1	1.5e-17	53/158(33.54)	97	PREDICTED: methyltransferase-like protein 24 [Hyalella azteca]
TRINITY_DN12939_c0_g1_i1_3	ADM45311.1	6.9e-06	25/66(37.88)	58	caspase [Eriocheir sinensis]
TRINITY_DN12941_c0_g2_i1_4	AAB31526.1	1.6e-08	82/340(24.12)	68	O-type P element protein {exons 0-3} [Drosophila bifasciata, Peptide Transposon Partial, 757 aa]
TRINITY_DN12946_c0_g2_i1_6	XP_018015614.1	1.7e-21	62/166(37.35)	110	PREDICTED: putative neural-cadherin 2 [Hyalella azteca]
TRINITY_DN12950_c0_g1_i4_5	XP_018017552.1	1.8e-204	424/712(59.55)	720	PREDICTED: serine/threonine-protein kinase 3-like [Hyalella azteca]
TRINITY_DN12957_c0_g1_i1_5	KFD48076.1	1.9e-11	72/239(30.13)	77	hypothetical protein M513_11019 [Trichuris suis]
TRINITY_DN12964_c0_g1_i1_3	XP_018017284.1	1.5e-12	58/208(27.88)	82	PREDICTED: uncharacterized protein LOC108673908, partial [Hyalella azteca]
TRINITY_DN12971_c0_g1_i1_3	XP_023311035.1	4.9e-32	67/107(62.62)	144	piggyBac transposable element-derived protein 4-like [Anoplophora glabripennis]
TRINITY_DN12971_c0_g1_i1_5	XP_018006486.1	3.5e-186	302/375(80.53)	658	PREDICTED: actin-related protein 2/3 complex subunit 1A-like isoform X2 [Hyalella azteca]
TRINITY_DN12975_c0_g1_i1_1	XP_018015228.1	2.3e-74	136/190(71.58)	286	PREDICTED: neuroligin-4, Y-linked-like [Hyalella azteca]
TRINITY_DN12980_c0_g1_i1_4	XP_018009338.1	4.3e-21	48/66(72.73)	110	PREDICTED: myelin expression factor 2-like [Hyalella azteca]
TRINITY_DN12980_c1_g2_i1_3	PIK50875.1	3.5e-83	137/236(58.05)	315	hypothetical protein BSL78_12256 [Apostichopus japonicus]
TRINITY_DN12983_c0_g1_i1_2	KOF69932.1	4.9e-47	142/493(28.80)	197	hypothetical protein OCBIM_22003845mg [Octopus bimaculoides]
TRINITY_DN12989_c0_g1_i1_5	XP_018019646.1	1.2e-161	299/495(60.40)	577	PREDICTED: beta-2-syntrophin-like [Hyalella azteca]
TRINITY_DN12989_c0_g1_i2_6	ESO87685.1	5.8e-24	62/124(50.00)	120	hypothetical protein LOTGIDRAFT_179232 [Lottia gigantea]
TRINITY_DN12992_c0_g2_i1_6	XP_021361806.1	8.6e-11	43/105(40.95)	75	uncharacterized protein LOC110455772 [Mizuhopecten yessoensis]
TRINITY_DN12992_c0_g2_i1_8	ABQ41232.1	9.4e-07	33/52(63.46)	60	male reproductive-related protein [Macrobrachium rosenbergii]
TRINITY_DN12995_c0_g1_i1_8	KRX25407.1	2.9e-07	29/57(50.88)	62	hypothetical protein T07_2140 [Trichinella nelsoni]
TRINITY_DN12996_c0_g1_i1_1	XP_018027705.1	3.5e-27	72/226(31.86)	130	PREDICTED: uncharacterized protein LOC108682949 [Hyalella azteca]
TRINITY_DN12996_c0_g1_i1_3	XP_019576547.1	2.5e-167	261/380(68.68)	595	PREDICTED: catalase-2 [Rhinolophus sinicus]
TRINITY_DN12997_c0_g1_i1_5	XP_018027139.1	3.5e-22	51/78(65.38)	112	PREDICTED: signal recognition particle 9 kDa protein-like [Hyalella azteca]
TRINITY_DN12998_c0_g1_i1_2	XP_023320668.1	4.9e-62	120/208(57.69)	246	mitotic spindle assembly checkpoint protein MAD2A-like [Eurytemora affinis]
TRINITY_DN12_c0_g1_i1_8	XP_018017658.1	1.9e-14	38/86(44.19)	86	PREDICTED: uncharacterized protein LOC108674232 [Hyalella azteca]
TRINITY_DN13002_c0_g1_i2_3	XP_018009884.1	4.2e-98	203/396(51.26)	366	PREDICTED: serine/threonine-protein kinase Nek8-like [Hyalella azteca]
TRINITY_DN13011_c0_g1_i1_3	XP_023209731.1	1.0e-21	52/108(48.15)	110	uncharacterized protein LOC111612724 [Centruroides sculpturatus]
TRINITY_DN13019_c0_g1_i1_7	XP_018013858.1	1.9e-139	233/424(54.95)	503	PREDICTED: alkylglycerol monooxygenase-like [Hyalella azteca]
TRINITY_DN1301_c0_g1_i1_5	XP_018024062.1	6.7e-58	126/245(51.43)	231	PREDICTED: kinase D-interacting substrate of 220 kDa-like isoform X2 [Hyalella azteca]
TRINITY_DN13021_c0_g1_i1_6	ADB65770.2	2.6e-96	235/368(63.86)	360	drosha [Penaeus japonicus]
TRINITY_DN13022_c0_g1_i1_3	AFA26603.1	3.2e-163	285/527(54.08)	582	cytochrome P450 V20 [Macrobrachium nipponense]
TRINITY_DN13027_c0_g1_i1_4	AFA42359.1	3.0e-19	69/180(38.33)	102	clip domain serine proteinase 1 [Portunus trituberculatus]
TRINITY_DN13031_c0_g1_i1_8	XP_021933164.1	8.0e-08	30/95(31.58)	65	uncharacterized protein C3orf38 homolog isoform X2 [Zootermopsis nevadensis]
TRINITY_DN13032_c0_g2_i1_5	XP_003729767.2	2.0e-30	64/103(62.14)	139	PREDICTED: uncharacterized protein LOC100889971 [Strongylocentrotus purpuratus]
TRINITY_DN13033_c0_g1_i1_4	XP_018024391.1	4.2e-08	35/95(36.84)	65	PREDICTED: uncharacterized protein LOC108680131 [Hyalella azteca]
TRINITY_DN13035_c0_g1_i2_2	XP_008550881.1	3.9e-95	177/212(83.49)	357	PREDICTED: ER lumen protein-retaining receptor [Microplitis demolitor]
TRINITY_DN13039_c0_g1_i1_5	XP_014677120.1	1.7e-14	46/80(57.50)	88	PREDICTED: general transcription factor II-I repeat domain-containing protein 2-like [Priapulus caudatus]
TRINITY_DN13041_c0_g1_i1_3	XP_008468265.1	5.7e-18	47/101(46.53)	99	monocarboxylate transporter 13 [Diaphorina citri]
TRINITY_DN13041_c0_g2_i1_3	XP_018024858.1	3.9e-10	30/75(40.00)	71	PREDICTED: monocarboxylate transporter 6-like [Hyalella azteca]
TRINITY_DN13042_c0_g1_i1_2	AWP38851.1	2.8e-63	114/115(99.13)	248	RING box protein 1 [Eriocheir sinensis]
TRINITY_DN13043_c0_g1_i1_5	XP_018026225.1	4.7e-50	112/202(55.45)	205	PREDICTED: substance-K receptor-like [Hyalella azteca]
TRINITY_DN13043_c0_g1_i1_7	ABC26005.1	2.1e-15	42/81(51.85)	90	arthrodial cuticle protein AMP16.3 [Callinectes sapidus]
TRINITY_DN13047_c0_g1_i1_6	PNF38155.1	7.5e-62	153/315(48.57)	245	hypothetical protein B7P43_G14547 [Cryptotermes secundus]
TRINITY_DN13047_c0_g2_i1_6	XP_018020269.1	1.4e-20	58/91(63.74)	107	PREDICTED: metabotropic glutamate receptor 6-like [Hyalella azteca]
TRINITY_DN13053_c0_g2_i1_5	ANA91274.1	3.9e-54	120/294(40.82)	219	dual oxidase [Penaeus japonicus]
TRINITY_DN13054_c0_g1_i1_2	XP_018022312.1	9.1e-06	50/153(32.68)	57	PREDICTED: uncharacterized protein LOC108678409 [Hyalella azteca]
TRINITY_DN13058_c0_g1_i1_8	BAK23962.1	2.6e-91	165/175(94.29)	342	ribulose-1,5-bisphosphate carboxylase/oxygenase small subunit [synthetic construct]
TRINITY_DN1305_c0_g2_i1_1	PAA65850.1	8.8e-06	25/49(51.02)	57	hypothetical protein BOX15_Mlig025290g1 [Macrostomum lignano]
TRINITY_DN13060_c0_g1_i1_8	AFJ11398.1	5.9e-74	130/207(62.80)	284	thromboxane A synthase [Penaeus monodon]
TRINITY_DN13061_c0_g1_i1_5	PIK48505.1	1.3e-16	60/193(31.09)	95	hypothetical protein BSL78_14607 [Apostichopus japonicus]
TRINITY_DN13065_c0_g1_i1_2	XP_018007603.1	3.8e-76	187/322(58.07)	292	PREDICTED: aminoacyl tRNA synthase complex-interacting multifunctional protein 1-like [Hyalella azteca]
TRINITY_DN13066_c0_g1_i1_4	XP_018020200.1	1.2e-94	178/234(76.07)	354	PREDICTED: ribose-5-phosphate isomerase-like [Hyalella azteca]
TRINITY_DN13069_c0_g1_i1_8	XP_018027735.1	2.4e-11	59/143(41.26)	77	PREDICTED: uncharacterized protein LOC108682979 [Hyalella azteca]
TRINITY_DN1306_c0_g1_i1_2	KZS07543.1	8.4e-41	84/119(70.59)	173	MFS-type transporter SLC18B1 [Daphnia magna]
TRINITY_DN13076_c0_g1_i1_6	XP_018023034.1	6.1e-58	107/208(51.44)	231	PREDICTED: protein O-linked-mannose beta-1,2-N-acetylglucosaminyltransferase 1-like [Hyalella azteca]
TRINITY_DN13080_c0_g1_i1_2	XP_021002526.1	1.0e-53	123/351(35.04)	218	hemicentin-1 [Parasteatoda tepidariorum]
TRINITY_DN13084_c0_g1_i1_8	XP_018023429.1	6.0e-21	78/169(46.15)	108	PREDICTED: uncharacterized protein LOC108679338 [Hyalella azteca]
TRINITY_DN13086_c0_g1_i1_8	XP_018007132.1	1.6e-56	110/181(60.77)	226	PREDICTED: discoidin domain-containing receptor 2-like [Hyalella azteca]
TRINITY_DN1308_c0_g1_i1_1	PSN46152.1	1.1e-23	60/105(57.14)	116	hypothetical protein C0J52_20931 [Blattella germanica]
TRINITY_DN13094_c0_g1_i1_6	XP_013070197.1	6.3e-61	117/230(50.87)	241	PREDICTED: aspartate aminotransferase-like [Biomphalaria glabrata]
TRINITY_DN13100_c0_g1_i1_6	EZA55433.1	3.1e-07	36/62(58.06)	62	hypothetical protein X777_04394, partial [Ooceraea biroi]
TRINITY_DN13101_c0_g4_i1_6	EFX88657.1	2.3e-18	58/149(38.93)	101	hypothetical protein DAPPUDRAFT_95568 [Daphnia pulex]
TRINITY_DN13105_c0_g3_i1_3	XP_018025139.1	2.0e-77	147/238(61.76)	296	PREDICTED: meckelin-like [Hyalella azteca]
TRINITY_DN13113_c0_g1_i1_6	XP_023704206.1	1.3e-108	201/274(73.36)	400	carcinine transporter-like, partial [Cryptotermes secundus]
TRINITY_DN13113_c0_g2_i1_6	XP_011157994.1	2.1e-11	35/67(52.24)	76	carcinine transporter isoform X1 [Solenopsis invicta]
TRINITY_DN13119_c0_g1_i1_7	XP_018017064.1	6.8e-209	337/584(57.71)	734	PREDICTED: uncharacterized family 31 glucosidase KIAA1161-like [Hyalella azteca]
TRINITY_DN1311_c0_g1_i1_5	XP_015820099.1	7.6e-19	43/101(42.57)	100	PREDICTED: kielin/chordin-like protein [Nothobranchius furzeri]
TRINITY_DN13121_c0_g1_i1_6	XP_969262.1	2.0e-123	208/260(80.00)	449	PREDICTED: 40S ribosomal protein S4 [Tribolium castaneum]
TRINITY_DN13123_c0_g1_i1_2	XP_018027569.1	3.6e-108	184/260(70.77)	399	PREDICTED: cytosolic Fe-S cluster assembly factor NUBP2 homolog [Hyalella azteca]
TRINITY_DN13124_c0_g1_i1_7	XP_023720036.1	4.5e-78	141/183(77.05)	299	calpain-C [Cryptotermes secundus]
TRINITY_DN13128_c0_g1_i1_6	PIK55836.1	6.2e-09	34/62(54.84)	68	putative zinc finger MYM-type protein 1-like [Apostichopus japonicus]
TRINITY_DN13129_c0_g1_i1_8	XP_026018079.1	2.5e-56	111/125(88.80)	225	40S ribosomal protein S17-like isoform X1 [Astatotilapia calliptera]
TRINITY_DN13138_c0_g2_i1_5	XP_018013202.1	1.2e-22	54/124(43.55)	113	PREDICTED: uncharacterized protein LOC108670253 [Hyalella azteca]
TRINITY_DN13144_c0_g1_i1_6	XP_018008860.1	3.0e-179	306/493(62.07)	636	PREDICTED: sedoheptulokinase-like [Hyalella azteca]
TRINITY_DN13146_c0_g1_i1_2	XP_018009874.1	2.3e-45	168/594(28.28)	191	PREDICTED: transient receptor potential cation channel subfamily A member 1 homolog [Hyalella azteca]
TRINITY_DN13151_c0_g1_i1_2	PIK34739.1	8.7e-22	56/145(38.62)	110	hypothetical protein BSL78_28435 [Apostichopus japonicus]
TRINITY_DN13151_c0_g1_i1_6	XP_023722503.1	0.0e+00	650/1065(61.03)	1232	pecanex-like protein 1 isoform X5 [Cryptotermes secundus]
TRINITY_DN13153_c0_g1_i1_1	XP_018014065.1	1.7e-10	54/212(25.47)	73	PREDICTED: uncharacterized protein LOC108671097 [Hyalella azteca]
TRINITY_DN13156_c0_g1_i1_3	XP_018019808.1	9.2e-244	410/727(56.40)	850	PREDICTED: puromycin-sensitive aminopeptidase-like protein, partial [Hyalella azteca]
TRINITY_DN13156_c0_g2_i1_3	XP_018019807.1	1.1e-94	164/317(51.74)	354	PREDICTED: aminopeptidase N-like [Hyalella azteca]
TRINITY_DN1315_c0_g1_i1_5	XP_023816875.1	4.1e-23	53/125(42.40)	115	uncharacterized protein LOC105357974 [Oryzias latipes]
TRINITY_DN13161_c0_g1_i1_6	XP_021371504.1	3.5e-28	61/135(45.19)	132	uncharacterized protein LOC110462052 [Mizuhopecten yessoensis]
TRINITY_DN13161_c0_g2_i1_6	XP_014677048.1	1.4e-10	35/68(51.47)	73	PREDICTED: uncharacterized protein LOC106816920 [Priapulus caudatus]
TRINITY_DN13162_c0_g2_i1_5	XP_018013152.1	4.1e-93	168/213(78.87)	348	PREDICTED: carcinine transporter-like [Hyalella azteca]
TRINITY_DN13166_c0_g1_i1_1	XP_018009310.1	1.9e-108	240/734(32.70)	401	PREDICTED: uncharacterized protein LOC108666881 [Hyalella azteca]
TRINITY_DN13173_c0_g1_i1_5	XP_023224522.1	2.3e-62	156/245(63.67)	246	inhibitor of growth protein 5-like isoform X1 [Centruroides sculpturatus]
TRINITY_DN13175_c0_g1_i1_4	ELT87977.1	8.7e-26	89/288(30.90)	125	hypothetical protein CAPTEDRAFT_202827 [Capitella teleta]
TRINITY_DN13175_c0_g1_i1_8	XP_018024385.1	4.2e-06	30/86(34.88)	58	PREDICTED: uncharacterized protein LOC108680125 [Hyalella azteca]
TRINITY_DN13186_c0_g1_i1_6	XP_009019054.1	3.5e-27	74/183(40.44)	129	hypothetical protein HELRODRAFT_174269 [Helobdella robusta]
TRINITY_DN13187_c0_g2_i1_3	XP_018020559.1	4.3e-19	56/130(43.08)	103	PREDICTED: vitelline membrane outer layer protein 1 homolog [Hyalella azteca]
TRINITY_DN13189_c0_g1_i1_4	ALR88667.1	9.3e-92	218/391(55.75)	345	notchless protein-like 131 [Saccoglossus kowalevskii]
TRINITY_DN13191_c0_g1_i1_8	AEC50086.1	1.3e-31	78/123(63.41)	144	TEP isoform 2 [Pacifastacus leniusculus]
TRINITY_DN13192_c0_g1_i1_4	XP_018009422.1	8.6e-17	52/87(59.77)	95	PREDICTED: uncharacterized protein LOC108666958 [Hyalella azteca]
TRINITY_DN13198_c0_g1_i1_3	XP_021355721.1	2.2e-38	82/166(49.40)	166	uncharacterized protein LOC110451837 [Mizuhopecten yessoensis]
TRINITY_DN13198_c0_g1_i1_6	XP_003705318.1	1.6e-212	360/548(65.69)	746	PREDICTED: threonylcarbamoyladenosine tRNA methylthiotransferase [Megachile rotundata]
TRINITY_DN13199_c0_g1_i1_5	XP_022257196.1	9.3e-14	109/375(29.07)	87	pecanex-like protein 3, partial [Limulus polyphemus]
TRINITY_DN13199_c0_g1_i1_6	KZS07184.1	4.1e-21	55/148(37.16)	108	Serine protease 33 [Daphnia magna]
TRINITY_DN131_c0_g1_i1_3	AFW98991.1	3.9e-31	62/100(62.00)	141	prophenoloxidase activating enzyme [Penaeus vannamei]
TRINITY_DN131_c0_g1_i1_4	XP_018022479.1	3.0e-25	62/106(58.49)	124	PREDICTED: serine/arginine repetitive matrix protein 2-like [Hyalella azteca]
TRINITY_DN13204_c0_g1_i1_6	PIK59928.1	3.3e-08	53/170(31.18)	66	hypothetical protein BSL78_03148 [Apostichopus japonicus]
TRINITY_DN13204_c1_g1_i1_6	XP_011665740.1	1.2e-13	70/232(30.17)	84	PREDICTED: uncharacterized protein LOC105436430 [Strongylocentrotus purpuratus]
TRINITY_DN13214_c0_g1_i1_3	XP_018008527.1	1.2e-43	86/185(46.49)	184	PREDICTED: uncharacterized protein LOC108666210 [Hyalella azteca]
TRINITY_DN13219_c0_g1_i1_6	XP_013783033.1	5.6e-18	62/169(36.69)	100	uncharacterized protein LOC106467250 [Limulus polyphemus]
TRINITY_DN13224_c0_g1_i1_6	XP_018015521.1	1.4e-73	166/406(40.89)	286	PREDICTED: uncharacterized protein LOC108672386 [Hyalella azteca]
TRINITY_DN13230_c0_g1_i1_3	XP_018027171.1	6.4e-94	168/235(71.49)	351	PREDICTED: mitochondrial 2-oxodicarboxylate carrier-like [Hyalella azteca]
TRINITY_DN13236_c0_g1_i1_2	XP_013791159.1	3.4e-30	107/277(38.63)	141	aquaporin AQPcic-like [Limulus polyphemus]
TRINITY_DN13237_c0_g1_i1_5	EPB72220.1	4.3e-27	91/281(32.38)	129	integrase core domain protein [Ancylostoma ceylanicum]
TRINITY_DN13238_c0_g1_i1_8	XP_014283499.1	6.1e-39	85/119(71.43)	168	zinc finger protein 593 homolog [Halyomorpha halys]
TRINITY_DN13239_c0_g1_i1_6	XP_025835228.1	8.8e-117	239/539(44.34)	429	poly(A) RNA polymerase, mitochondrial isoform X1 [Agrilus planipennis]
TRINITY_DN13244_c0_g1_i1_8	XP_011868892.1	2.3e-11	42/74(56.76)	77	PREDICTED: protein bowel-like [Vollenhovia emeryi]
TRINITY_DN13247_c0_g1_i1_2	XP_018018682.1	1.7e-277	457/630(72.54)	963	PREDICTED: glutamate--cysteine ligase catalytic subunit-like [Hyalella azteca]
TRINITY_DN1324_c0_g1_i1_5	PIK33572.1	4.6e-07	37/101(36.63)	61	hypothetical protein BSL78_29612 [Apostichopus japonicus]
TRINITY_DN13251_c0_g1_i1_1	XP_018020502.1	1.0e-45	83/122(68.03)	190	PREDICTED: uncharacterized protein LOC108676863 [Hyalella azteca]
TRINITY_DN13252_c0_g1_i1_3	XP_019633926.1	2.3e-90	171/271(63.10)	340	PREDICTED: S-adenosylmethionine mitochondrial carrier protein-like [Branchiostoma belcheri]
TRINITY_DN13256_c0_g1_i1_6	XP_015434907.1	3.3e-24	103/374(27.54)	120	PREDICTED: DALR anticodon-binding domain-containing protein 3 [Dufourea novaeangliae]
TRINITY_DN13258_c0_g1_i1_3	XP_018013668.1	1.4e-20	183/668(27.40)	109	PREDICTED: uncharacterized protein LOC108670692 [Hyalella azteca]
TRINITY_DN13259_c0_g1_i2_6	XP_018009713.1	2.6e-33	69/85(81.18)	149	PREDICTED: serine/arginine-rich-splicing factor SR34-like isoform X2 [Hyalella azteca]
TRINITY_DN1325_c0_g1_i1_7	AOO86752.1	1.9e-59	115/115(100.00)	236	A-type potassium channel Shaker [Homarus americanus]
TRINITY_DN13260_c0_g1_i1_3	XP_022914182.1	2.2e-99	173/287(60.28)	369	39S ribosomal protein L15, mitochondrial [Onthophagus taurus]
TRINITY_DN13263_c0_g1_i1_5	XP_019621937.1	5.5e-53	97/195(49.74)	215	PREDICTED: piggyBac transposable element-derived protein 4-like isoform X1 [Branchiostoma belcheri]
TRINITY_DN13268_c0_g2_i1_6	XP_023217458.1	1.2e-13	39/94(41.49)	84	venom protein 302-like [Centruroides sculpturatus]
TRINITY_DN13278_c0_g1_i1_1	XP_009029097.1	1.2e-12	44/99(44.44)	80	hypothetical protein HELRODRAFT_164914 [Helobdella robusta]
TRINITY_DN13280_c0_g1_i1_2	XP_011440797.1	1.0e-27	127/504(25.20)	132	PREDICTED: F-box only protein 22 [Crassostrea gigas]
TRINITY_DN13282_c0_g2_i2_5	XP_018027278.1	6.4e-35	110/251(43.82)	156	PREDICTED: protein split ends-like [Hyalella azteca]
TRINITY_DN13287_c0_g1_i1_7	XP_022177823.1	4.7e-27	61/132(46.21)	128	uncharacterized protein LOC111038870 [Myzus persicae]
TRINITY_DN13295_c0_g1_i1_6	XP_023227506.1	3.1e-27	67/99(67.68)	130	hyccin-like isoform X1 [Centruroides sculpturatus]
TRINITY_DN13295_c0_g1_i3_8	PNF32092.1	1.6e-123	219/306(71.57)	452	TAR DNA-binding protein 43 [Cryptotermes secundus]
TRINITY_DN13297_c0_g1_i1_4	XP_013773982.2	4.2e-135	240/515(46.60)	489	uncharacterized protein LOC106458959 [Limulus polyphemus]
TRINITY_DN13297_c0_g1_i1_8	KFM73191.1	9.7e-19	46/112(41.07)	101	putative RNA-directed DNA polymerase from transposon X-element, partial [Stegodyphus mimosarum]
TRINITY_DN13301_c0_g1_i1_6	CRK93608.1	8.4e-11	32/101(31.68)	74	CLUMA_CG007138, isoform A [Clunio marinus]
TRINITY_DN13303_c0_g1_i2_2	ACR54108.1	1.6e-32	69/71(97.18)	146	ribosomal protein L37, partial [Palaemon varians]
TRINITY_DN13304_c0_g2_i1_6	BAD91056.1	1.6e-267	458/861(53.19)	929	Cj-cadherin [Caridina multidentata]
TRINITY_DN13306_c0_g1_i1_3	XP_018014071.1	2.9e-162	250/347(72.05)	580	PREDICTED: galactose-1-phosphate uridylyltransferase-like [Hyalella azteca]
TRINITY_DN13307_c0_g1_i1_6	PSN45049.1	2.9e-103	188/266(70.68)	384	Septin-4 [Blattella germanica]
TRINITY_DN13309_c0_g1_i3_7	ACY66590.1	1.4e-19	44/56(78.57)	105	hypothetical protein [Scylla paramamosain]
TRINITY_DN13310_c0_g1_i1_6	XP_018904008.1	2.1e-67	159/231(68.83)	263	PREDICTED: dnaJ homolog subfamily C member 8 [Bemisia tabaci]
TRINITY_DN13315_c0_g1_i1_6	XP_018026160.1	1.7e-41	79/124(63.71)	177	PREDICTED: multifunctional methyltransferase subunit TRM112-like protein [Hyalella azteca]
TRINITY_DN13321_c0_g1_i1_3	XP_018014150.1	1.7e-199	536/1221(43.90)	704	PREDICTED: uncharacterized protein LOC108671168 [Hyalella azteca]
TRINITY_DN13324_c0_g1_i1_6	EEN53284.1	5.3e-77	284/626(45.37)	296	hypothetical protein BRAFLDRAFT_118155 [Branchiostoma floridae]
TRINITY_DN13334_c0_g1_i1_6	XP_015775397.1	1.0e-26	59/103(57.28)	126	PREDICTED: uncharacterized protein LOC107353580 [Acropora digitifera]
TRINITY_DN13337_c0_g2_i1_2	XP_014675866.1	2.8e-47	101/199(50.75)	196	PREDICTED: uncharacterized protein LOC106815855 [Priapulus caudatus]
TRINITY_DN13338_c0_g1_i1_4	XP_018007863.1	7.7e-11	52/135(38.52)	75	PREDICTED: uncharacterized protein LOC108665598 [Hyalella azteca]
TRINITY_DN1333_c0_g1_i1_2	XP_023217819.1	3.3e-23	71/174(40.80)	116	U7 snRNA-associated Sm-like protein LSm11 [Centruroides sculpturatus]
TRINITY_DN13341_c0_g1_i1_5	XP_026701693.1	1.5e-25	54/100(54.00)	124	angiopoietin-related protein 7-like isoform X2 [Athene cunicularia]
TRINITY_DN13344_c0_g1_i1_2	XP_021924511.1	8.3e-117	208/344(60.47)	428	N(4)-(Beta-N-acetylglucosaminyl)-L-asparaginase [Zootermopsis nevadensis]
TRINITY_DN13345_c0_g1_i1_7	XP_013778951.1	1.2e-29	67/105(63.81)	137	lipoma HMGIC fusion partner-like 3 protein [Limulus polyphemus]
TRINITY_DN13345_c0_g1_i2_8	XP_018027156.1	4.6e-124	243/524(46.37)	453	PREDICTED: UDP-glucuronosyltransferase 2B14-like [Hyalella azteca]
TRINITY_DN13348_c0_g1_i1_3	APF29561.1	1.3e-190	324/501(64.67)	673	endo-beta-1,4-glucanase, partial [Coenobita rugosus]
TRINITY_DN13349_c0_g1_i1_3	AAB03106.1	2.3e-133	228/480(47.50)	483	cytochrome P450 [Panulirus argus]
TRINITY_DN13350_c0_g1_i1_6	AHI47024.1	3.9e-66	132/138(95.65)	258	doublesex and mab-3 related transcription factor 11E [Macrobrachium rosenbergii]
TRINITY_DN13355_c0_g1_i1_2	XP_021387326.1	2.0e-45	124/368(33.70)	191	centrosomal protein of 135 kDa isoform X2 [Lonchura striata domestica]
TRINITY_DN13356_c0_g1_i1_3	XP_020325594.1	3.8e-110	260/611(42.55)	406	arylsulfatase D-like [Oncorhynchus kisutch]
TRINITY_DN13356_c0_g1_i1_7	XP_015797379.1	3.9e-12	45/137(32.85)	80	PREDICTED: uncharacterized protein LOC107373737 [Nothobranchius furzeri]
TRINITY_DN13359_c0_g1_i1_1	XP_023209908.1	2.0e-37	82/140(58.57)	163	uncharacterized protein LOC111612865 isoform X2 [Centruroides sculpturatus]
TRINITY_DN1335_c0_g1_i1_2	XP_008835831.1	1.1e-49	109/208(52.40)	204	PREDICTED: isoprenoid synthase domain-containing protein, partial [Nannospalax galili]
TRINITY_DN1335_c0_g1_i1_3	XP_018568699.1	1.7e-10	42/106(39.62)	73	O-acyltransferase like protein [Anoplophora glabripennis]
TRINITY_DN13362_c0_g1_i1_8	XP_014681614.1	3.0e-47	92/176(52.27)	196	PREDICTED: alpha-L-fucosidase-like [Priapulus caudatus]
TRINITY_DN13363_c0_g1_i2_7	XP_018008985.1	3.7e-55	109/121(90.08)	223	PREDICTED: uncharacterized protein LOC108666589 [Hyalella azteca]
TRINITY_DN13376_c0_g1_i1_5	XP_018022136.1	4.2e-23	66/160(41.25)	115	PREDICTED: uncharacterized protein LOC108678266 [Hyalella azteca]
TRINITY_DN13378_c0_g1_i1_6	XP_013788053.1	1.2e-26	106/360(29.44)	129	uncharacterized protein LOC106471971 [Limulus polyphemus]
TRINITY_DN13383_c0_g1_i1_6	PIK35251.1	1.4e-24	86/219(39.27)	120	putative telomere length regulation protein TEL2-like isoform X1 [Apostichopus japonicus]
TRINITY_DN13385_c0_g1_i1_6	XP_014663109.1	7.6e-51	98/172(56.98)	207	PREDICTED: kynurenine/alpha-aminoadipate aminotransferase, mitochondrial-like [Priapulus caudatus]
TRINITY_DN13385_c0_g2_i2_6	EFX90234.1	2.0e-21	50/129(38.76)	109	hypothetical protein DAPPUDRAFT_299942 [Daphnia pulex]
TRINITY_DN13386_c0_g2_i1_5	XP_015186219.1	3.7e-87	190/389(48.84)	329	PREDICTED: protein dopey-1 homolog isoform X1 [Polistes dominula]
TRINITY_DN13387_c0_g1_i1_6	XP_018024442.1	2.0e-99	330/1061(31.10)	371	PREDICTED: uncharacterized protein LOC108680180 [Hyalella azteca]
TRINITY_DN13397_c0_g1_i1_6	XP_021003719.1	9.1e-86	202/549(36.79)	325	folliculin-like [Parasteatoda tepidariorum]
TRINITY_DN13399_c0_g1_i1_5	XP_018022907.1	2.2e-07	40/105(38.10)	63	PREDICTED: metalloprotease TIKI2-like [Hyalella azteca]
TRINITY_DN13400_c0_g2_i1_6	XP_023219504.1	4.9e-118	190/327(58.10)	431	calpain-7-like [Centruroides sculpturatus]
TRINITY_DN13403_c0_g2_i1_3	XP_015234818.1	1.9e-110	182/330(55.15)	407	PREDICTED: alpha-N-acetylglucosaminidase [Cyprinodon variegatus]
TRINITY_DN13403_c0_g3_i1_3	XP_021938138.1	8.5e-78	133/207(64.25)	297	alpha-N-acetylglucosaminidase isoform X2 [Zootermopsis nevadensis]
TRINITY_DN13405_c0_g1_i2_5	XP_015435512.1	2.8e-102	285/523(54.49)	380	PREDICTED: mitogen-activated protein kinase kinase kinase 11-like isoform X2 [Dufourea novaeangliae]
TRINITY_DN13408_c0_g1_i1_7	XP_023326699.1	2.8e-17	44/56(78.57)	97	uncharacterized protein LOC111700111 [Eurytemora affinis]
TRINITY_DN13410_c0_g1_i1_8	XP_023192802.1	6.6e-06	42/128(32.81)	58	WD repeat-containing protein 3 isoform X1 [Xiphophorus maculatus]
TRINITY_DN13415_c0_g1_i2_6	XP_018024465.1	5.5e-17	55/147(37.41)	95	PREDICTED: uncharacterized protein LOC108680202 [Hyalella azteca]
TRINITY_DN13419_c0_g1_i2_4	KOF94507.1	1.3e-06	29/36(80.56)	60	hypothetical protein OCBIM_22001615mg [Octopus bimaculoides]
TRINITY_DN13420_c0_g1_i1_6	XP_008559794.1	2.3e-79	133/273(48.72)	303	PREDICTED: carotenoid isomerooxygenase [Microplitis demolitor]
TRINITY_DN13421_c0_g1_i4_4	ATW66457.1	4.4e-114	212/233(90.99)	419	hormone receptor, partial [Penaeus japonicus]
TRINITY_DN13423_c0_g1_i1_4	AGU01545.1	2.0e-24	63/91(69.23)	120	antimicrobial peptide type 2 precursor IIc [Pandalopsis japonica]
TRINITY_DN13423_c0_g1_i1_6	XP_018020818.1	4.6e-101	173/258(67.05)	375	PREDICTED: uncharacterized protein LOC108677161 [Hyalella azteca]
TRINITY_DN13424_c1_g1_i1_3	XP_012942365.1	2.9e-07	34/81(41.98)	63	PREDICTED: uncharacterized protein LOC106012821 [Aplysia californica]
TRINITY_DN13425_c0_g1_i1_1	XP_021922100.1	1.2e-45	101/241(41.91)	191	Down syndrome cell adhesion molecule homolog isoform X1 [Zootermopsis nevadensis]
TRINITY_DN13427_c0_g2_i1_6	XP_018019807.1	1.6e-117	197/368(53.53)	430	PREDICTED: aminopeptidase N-like [Hyalella azteca]
TRINITY_DN13436_c0_g1_i1_4	XP_019876707.1	2.0e-08	38/100(38.00)	68	PREDICTED: LOW QUALITY PROTEIN: DAZ-associated protein 2 [Aethina tumida]
TRINITY_DN13440_c0_g1_i1_1	XP_002023086.1	4.7e-40	153/609(25.12)	174	GL21167 [Drosophila persimilis]
TRINITY_DN13440_c0_g1_i1_5	APW79685.1	1.8e-62	108/160(67.50)	248	rieske domain oxygenase meverland [Penaeus monodon]
TRINITY_DN13441_c0_g1_i1_7	ADV30208.1	3.1e-46	110/114(96.49)	191	NADH dehydrogenase subunit 3 (mitochondrion) [Macrobrachium nipponense]
TRINITY_DN13442_c0_g1_i1_6	XP_023702291.1	1.7e-63	124/154(80.52)	250	ras-related protein Rab-37-like isoform X2 [Cryptotermes secundus]
TRINITY_DN13448_c0_g2_i1_6	XP_012256388.1	1.8e-125	315/742(42.45)	457	ADP-ribosylation factor-binding protein GGA1 [Athalia rosae]
TRINITY_DN13450_c0_g1_i1_6	APG53786.1	3.3e-07	26/81(32.10)	62	transient receptor potential cation channel pyrexia [Homarus americanus]
TRINITY_DN13452_c0_g1_i1_4	AJM87337.1	1.8e-14	39/70(55.71)	86	flotillin-like protein [Eriocheir sinensis]
TRINITY_DN13457_c0_g1_i1_6	OZF96957.1	6.9e-10	67/263(25.48)	73	hypothetical protein FL83_19584, partial [Caenorhabditis latens]
TRINITY_DN1345_c0_g1_i1_2	EEC16344.1	2.9e-37	85/213(39.91)	163	metalloendopeptidase OMA1, putative [Ixodes scapularis]
TRINITY_DN13462_c0_g1_i1_2	XP_012280177.1	4.3e-22	52/96(54.17)	111	Down syndrome cell adhesion molecule-like protein Dscam2 [Orussus abietinus]
TRINITY_DN13469_c0_g1_i1_7	XP_316954.4	1.6e-108	212/413(51.33)	401	AGAP008490-PA, partial [Anopheles gambiae str. PEST]
TRINITY_DN13471_c0_g1_i1_3	BAB13775.1	2.3e-31	90/312(28.85)	144	oxygenase [Oplophorus gracilirostris]
TRINITY_DN13473_c0_g2_i1_7	XP_018021116.1	2.0e-32	64/128(50.00)	146	PREDICTED: nephrin-like [Hyalella azteca]
TRINITY_DN13474_c0_g2_i1_3	XP_014287051.1	9.5e-14	38/69(55.07)	84	uncharacterized protein LOC106687590 isoform X1 [Halyomorpha halys]
TRINITY_DN13476_c0_g1_i1_5	XP_018016376.1	7.3e-109	191/387(49.35)	401	PREDICTED: alpha-ketoglutarate-dependent dioxygenase alkB homolog 4-like [Hyalella azteca]
TRINITY_DN13480_c0_g1_i2_6	XP_023231480.1	1.5e-108	181/261(69.35)	400	FERM domain-containing protein 5-like isoform X2 [Centruroides sculpturatus]
TRINITY_DN13481_c0_g1_i2_3	XP_018026007.1	1.1e-23	51/74(68.92)	118	PREDICTED: exosome complex component CSL4-like [Hyalella azteca]
TRINITY_DN13481_c0_g1_i2_5	XP_018014286.1	1.6e-163	274/340(80.59)	583	PREDICTED: probable tRNA N6-adenosine threonylcarbamoyltransferase [Hyalella azteca]
TRINITY_DN13484_c0_g1_i1_6	XP_018012972.1	1.6e-121	211/360(58.61)	443	PREDICTED: chitinase domain-containing protein 1-like [Hyalella azteca]
TRINITY_DN1348_c0_g1_i1_4	XP_018020842.1	2.3e-48	101/159(63.52)	199	PREDICTED: ligand of Numb protein X 2-like [Hyalella azteca]
TRINITY_DN13491_c0_g2_i1_5	ADM45311.1	3.9e-22	64/196(32.65)	112	caspase [Eriocheir sinensis]
TRINITY_DN13492_c0_g1_i1_8	XP_018021888.1	3.0e-09	27/109(24.77)	70	PREDICTED: uncharacterized protein LOC108678060 [Hyalella azteca]
TRINITY_DN13493_c0_g1_i1_6	XP_018023712.1	8.6e-100	189/286(66.08)	371	PREDICTED: enoyl-CoA hydratase, mitochondrial-like [Hyalella azteca]
TRINITY_DN13495_c0_g1_i1_8	XP_026317880.1	1.8e-21	73/213(34.27)	110	Down syndrome cell adhesion molecule-like protein Dscam2 [Hyposmocoma kahamanoa]
TRINITY_DN13502_c0_g1_i1_3	XP_018006603.1	1.4e-23	71/231(30.74)	117	PREDICTED: uncharacterized protein LOC108664518 [Hyalella azteca]
TRINITY_DN13502_c0_g1_i1_5	XP_023241135.1	3.5e-11	43/103(41.75)	75	uncharacterized protein LOC111639474 [Centruroides sculpturatus]
TRINITY_DN13503_c0_g1_i1_5	XP_018022661.1	2.0e-50	99/216(45.83)	206	PREDICTED: probable serine incorporator [Hyalella azteca]
TRINITY_DN13505_c0_g1_i1_6	XP_018573906.1	4.7e-121	206/354(58.19)	442	UDP-glucose 4-epimerase isoform X1 [Anoplophora glabripennis]
TRINITY_DN13515_c0_g1_i1_4	PIK36310.1	1.4e-22	51/107(47.66)	114	hypothetical protein BSL78_26859 [Apostichopus japonicus]
TRINITY_DN13516_c0_g1_i1_3	AWU67091.1	3.3e-178	313/483(64.80)	632	putative trypsin [Crangon crangon]
TRINITY_DN13517_c0_g1_i2_6	XP_018016521.1	1.8e-198	329/516(63.76)	700	PREDICTED: neural-cadherin-like isoform X1 [Hyalella azteca]
TRINITY_DN13518_c0_g1_i1_8	XP_018009529.1	3.7e-71	190/332(57.23)	276	PREDICTED: uncharacterized protein LOC108667058 [Hyalella azteca]
TRINITY_DN1351_c0_g1_i1_3	XP_015830870.1	1.0e-07	41/103(39.81)	63	PREDICTED: uncharacterized protein LOC107395907, partial [Nothobranchius furzeri]
TRINITY_DN13522_c0_g1_i1_8	PNF19055.1	0.0e+00	566/793(71.37)	1171	Diacylglycerol kinase theta, partial [Cryptotermes secundus]
TRINITY_DN13522_c0_g2_i1_3	XP_018571854.1	2.9e-13	44/94(46.81)	82	beta-1,3-galactosyltransferase 5-like [Anoplophora glabripennis]
TRINITY_DN13523_c0_g1_i1_5	XP_026274629.1	5.1e-33	72/101(71.29)	148	syntaxin-binding protein 5 isoform X1 [Frankliniella occidentalis]
TRINITY_DN13526_c0_g1_i1_2	XP_018009302.1	2.9e-83	149/217(68.66)	316	PREDICTED: store-operated calcium entry regulator STIMATE-like [Hyalella azteca]
TRINITY_DN13529_c0_g1_i1_2	XP_018028097.1	2.6e-48	90/152(59.21)	199	PREDICTED: glucose-6-phosphate 1-dehydrogenase-like isoform X1 [Hyalella azteca]
TRINITY_DN13533_c0_g1_i1_6	XP_021935929.1	3.5e-299	567/1206(47.01)	1035	receptor-type guanylate cyclase gcy-4-like isoform X2 [Zootermopsis nevadensis]
TRINITY_DN13536_c0_g1_i1_1	AGZ84436.1	2.6e-143	371/439(84.51)	516	tumor susceptibility protein 101-like protein [Procambarus clarkii]
TRINITY_DN13539_c0_g1_i1_6	XP_023216513.1	1.0e-187	316/466(67.81)	664	hydroxymethylglutaryl-CoA synthase 1-like [Centruroides sculpturatus]
TRINITY_DN13540_c0_g2_i1_8	XP_026468596.1	1.2e-23	73/203(35.96)	118	matrix metalloproteinase-2-like [Ctenocephalides felis]
TRINITY_DN13542_c0_g1_i1_6	XP_026756355.1	6.9e-27	100/260(38.46)	129	protein split ends [Galleria mellonella]
TRINITY_DN13553_c0_g1_i1_4	AAH53854.1	9.3e-26	65/117(55.56)	123	Unknown (protein for IMAGE:5194336), partial [Homo sapiens]
TRINITY_DN13556_c0_g1_i1_8	XP_013994787.1	2.4e-59	130/255(50.98)	237	PREDICTED: RNA exonuclease 4-like [Salmo salar]
TRINITY_DN13563_c0_g1_i1_5	XP_018406776.1	3.1e-24	55/112(49.11)	118	PREDICTED: uncharacterized protein LOC108771307 [Cyphomyrmex costatus]
TRINITY_DN13564_c0_g1_i1_6	XP_018579643.1	9.3e-78	145/169(85.80)	297	soluble guanylate cyclase 88E [Anoplophora glabripennis]
TRINITY_DN13566_c0_g1_i1_6	XP_018026511.1	3.2e-27	167/555(30.09)	130	PREDICTED: high affinity cGMP-specific 3',5'-cyclic phosphodiesterase 9A-like [Hyalella azteca]
TRINITY_DN13567_c0_g1_i1_2	XP_018021739.1	5.1e-57	112/147(76.19)	229	PREDICTED: endothelial differentiation-related factor 1-like [Hyalella azteca]
TRINITY_DN13568_c0_g1_i1_5	XP_018617652.1	9.3e-30	75/174(43.10)	137	PREDICTED: tigger transposable element-derived protein 1 [Scleropages formosus]
TRINITY_DN13568_c0_g2_i1_2	XP_013080024.1	7.0e-09	30/90(33.33)	68	PREDICTED: piggyBac transposable element-derived protein 4-like [Biomphalaria glabrata]
TRINITY_DN13570_c0_g1_i2_7	AMN88381.1	2.6e-112	204/264(77.27)	413	c-type lectin [Macrobrachium rosenbergii]
TRINITY_DN13571_c0_g1_i1_8	XP_019530277.1	3.7e-21	69/180(38.33)	110	PREDICTED: ectonucleoside triphosphate diphosphohydrolase 5 isoform X1 [Aedes albopictus]
TRINITY_DN13572_c0_g1_i1_3	AYD41602.1	3.9e-23	59/192(30.73)	116	B-cell differentiation antigen CD72, partial [Procambarus clarkii]
TRINITY_DN13572_c0_g1_i1_4	ODM92729.1	7.9e-28	64/72(88.89)	131	Protein transport protein Sec61 subunit gamma [Orchesella cincta]
TRINITY_DN13574_c0_g2_i1_2	XP_018023337.1	5.6e-17	49/105(46.67)	94	PREDICTED: uncharacterized protein LOC108679254 [Hyalella azteca]
TRINITY_DN13580_c0_g1_i1_6	XP_018017745.1	4.8e-31	69/160(43.12)	141	PREDICTED: uncharacterized protein LOC108674318 [Hyalella azteca]
TRINITY_DN13580_c0_g1_i1_7	XP_021930293.1	1.2e-22	71/189(37.57)	114	lysoplasmalogenase-like protein TMEM86A isoform X2 [Zootermopsis nevadensis]
TRINITY_DN13580_c0_g3_i2_3	XP_018015467.1	8.6e-59	147/387(37.98)	235	PREDICTED: uncharacterized protein LOC108672335, partial [Hyalella azteca]
TRINITY_DN13584_c0_g1_i1_4	BAF73806.1	3.3e-25	65/129(50.39)	123	calcification associated soluble matrix protein 2 [Procambarus clarkii]
TRINITY_DN13589_c0_g1_i1_5	XP_018021927.1	0.0e+00	661/1625(40.68)	1090	PREDICTED: agrin-like [Hyalella azteca]
TRINITY_DN13590_c0_g1_i2_7	ARM56004.1	7.2e-233	473/535(88.41)	813	L-type voltage-dependent calcium channel alpha-1 subunit [Scylla paramamosain]
TRINITY_DN13593_c0_g1_i1_3	XP_025098015.1	9.8e-08	36/105(34.29)	66	tripartite motif-containing protein 45-like [Pomacea canaliculata]
TRINITY_DN13593_c0_g1_i1_4	AAP79147.1	4.8e-28	70/117(59.83)	131	photosystem I protein PsaD [Bigelowiella natans]
TRINITY_DN13593_c0_g1_i1_7	XP_018014879.1	1.6e-140	242/305(79.34)	508	PREDICTED: tumor suppressor candidate 3-like [Hyalella azteca]
TRINITY_DN13598_c0_g1_i1_5	ANH79230.1	3.3e-20	55/109(50.46)	105	VLIG1 [Macrobrachium rosenbergii]
TRINITY_DN13599_c0_g1_i1_5	ADW27186.1	1.7e-43	91/92(98.91)	184	small ubiquitin-like modifier-1 [Eriocheir sinensis]
TRINITY_DN1359_c0_g1_i1_5	XP_001198293.2	8.1e-10	38/124(30.65)	71	PREDICTED: lysosomal-trafficking regulator [Strongylocentrotus purpuratus]
TRINITY_DN13602_c0_g1_i2_5	XP_018577698.1	2.3e-78	152/233(65.24)	300	GTP-binding protein Rit1-like [Anoplophora glabripennis]
TRINITY_DN13611_c0_g1_i1_5	XP_022335210.1	1.7e-35	74/136(54.41)	157	uncharacterized protein LOC111131795 [Crassostrea virginica]
TRINITY_DN13611_c0_g1_i2_2	XP_018015936.1	1.6e-14	37/93(39.78)	88	PREDICTED: probable serine/threonine-protein kinase samkC [Hyalella azteca]
TRINITY_DN13613_c0_g1_i1_5	XP_018020252.1	1.4e-07	33/84(39.29)	63	PREDICTED: RNA-directed DNA polymerase from mobile element jockey-like [Hyalella azteca]
TRINITY_DN13613_c0_g1_i1_7	XP_019535219.1	1.8e-125	213/331(64.35)	457	PREDICTED: mitochondrial inner membrane protein OXA1L [Aedes albopictus]
TRINITY_DN13615_c0_g1_i1_6	XP_016658420.1	7.5e-32	68/126(53.97)	144	PREDICTED: uncharacterized protein LOC107883268 [Acyrthosiphon pisum]
TRINITY_DN13634_c0_g1_i1_3	XP_018027669.1	9.7e-14	40/86(46.51)	84	PREDICTED: uncharacterized protein LOC108682923 [Hyalella azteca]
TRINITY_DN13635_c0_g1_i3_2	XP_016662984.1	2.5e-12	43/127(33.86)	80	PREDICTED: uncharacterized protein LOC107884743 [Acyrthosiphon pisum]
TRINITY_DN13640_c0_g1_i1_2	XP_020620637.1	4.3e-09	39/152(25.66)	70	CD151 antigen-like [Orbicella faveolata]
TRINITY_DN13643_c0_g1_i1_1	XP_023701946.1	1.9e-41	130/446(29.15)	178	AP-4 complex accessory subunit Tepsin-like isoform X1 [Cryptotermes secundus]
TRINITY_DN13643_c0_g1_i2_6	XP_018019979.1	1.6e-121	208/331(62.84)	443	PREDICTED: alanine--glyoxylate aminotransferase 2, mitochondrial-like [Hyalella azteca]
TRINITY_DN13646_c0_g1_i1_6	XP_018012882.1	1.0e-16	46/90(51.11)	94	PREDICTED: epithelial chloride channel protein-like [Hyalella azteca]
TRINITY_DN13649_c0_g1_i1_3	AVP74312.1	3.4e-11	40/112(35.71)	75	leucine rich repeat only protein 2 [Penaeus vannamei]
TRINITY_DN13649_c0_g1_i1_7	XP_018007224.1	5.1e-14	41/102(40.20)	85	PREDICTED: uncharacterized protein LOC108665022 [Hyalella azteca]
TRINITY_DN13649_c0_g2_i1_3	XP_015914168.2	1.8e-09	36/109(33.03)	69	toll-like receptor 3 [Parasteatoda tepidariorum]
TRINITY_DN1364_c0_g1_i1_3	AOG12988.1	1.4e-19	59/91(64.84)	103	dopamine receptor subtype alpha-2R, partial [Homarus americanus]
TRINITY_DN13650_c0_g1_i1_5	AJC52503.1	1.5e-50	115/170(67.65)	207	prostaglandin F synthase [Scylla olivacea]
TRINITY_DN13650_c0_g1_i1_6	PFX26238.1	9.5e-23	50/100(50.00)	113	Sarcosine dehydrogenase, mitochondrial [Stylophora pistillata]
TRINITY_DN13652_c0_g2_i1_5	XP_018015124.1	3.8e-66	242/749(32.31)	260	PREDICTED: type I inositol 3,4-bisphosphate 4-phosphatase-like, partial [Hyalella azteca]
TRINITY_DN13653_c0_g1_i1_2	XP_015185528.1	6.1e-145	298/493(60.45)	521	PREDICTED: potassium voltage-gated channel subfamily H member 2 isoform X8 [Polistes dominula]
TRINITY_DN13657_c0_g1_i2_3	XP_018022916.1	4.7e-101	184/272(67.65)	375	PREDICTED: exosome complex exonuclease RRP42-like [Hyalella azteca]
TRINITY_DN13658_c0_g2_i1_3	XP_006880322.1	2.1e-08	34/61(55.74)	66	PREDICTED: isoprenoid synthase domain-containing protein [Elephantulus edwardii]
TRINITY_DN13658_c0_g3_i1_3	XP_019515431.1	1.0e-30	73/144(50.69)	140	PREDICTED: isoprenoid synthase domain-containing protein isoform X1 [Hipposideros armiger]
TRINITY_DN13659_c1_g1_i1_1	XP_021913092.1	3.5e-35	75/138(54.35)	157	serine/threonine/tyrosine-interacting protein-like isoform X3 [Zootermopsis nevadensis]
TRINITY_DN13662_c0_g1_i1_6	XP_023021713.1	5.2e-59	113/299(37.79)	236	39S ribosomal protein L1, mitochondrial [Leptinotarsa decemlineata]
TRINITY_DN13664_c0_g1_i1_6	PNF20855.1	4.9e-123	250/513(48.73)	449	CDK5 regulatory subunit-associated protein 3 [Cryptotermes secundus]
TRINITY_DN13671_c0_g1_i2_5	XP_018012519.1	4.2e-09	25/54(46.30)	68	PREDICTED: protein tramtrack, beta isoform-like isoform X6 [Hyalella azteca]
TRINITY_DN13673_c0_g1_i1_4	AEA51117.1	1.3e-07	34/76(44.74)	64	endonuclease-reverse transcriptase HmRTE-e01, partial [Oryzias melastigma]
TRINITY_DN13677_c0_g1_i1_6	ADI96223.1	2.3e-26	53/115(46.09)	126	Kazal-type serine proteinase inhibitor 3 [Procambarus clarkii]
TRINITY_DN13679_c0_g1_i1_1	BAM35674.1	8.9e-12	59/211(27.96)	78	putative reverse transcriptase [Penaeus japonicus]
TRINITY_DN1367_c0_g1_i1_7	XP_021923876.1	2.9e-65	122/248(49.19)	256	zinc finger protein jing [Zootermopsis nevadensis]
TRINITY_DN13685_c0_g1_i1_3	XP_018017688.1	4.3e-44	144/304(47.37)	186	PREDICTED: uncharacterized protein LOC108674259 [Hyalella azteca]
TRINITY_DN13685_c0_g1_i1_8	XP_018014516.1	5.5e-65	118/149(79.19)	254	PREDICTED: bestrophin-4-like, partial [Hyalella azteca]
TRINITY_DN13687_c0_g1_i1_3	XP_018904571.1	3.1e-09	45/93(48.39)	69	PREDICTED: ralA-binding protein 1-like isoform X1 [Bemisia tabaci]
TRINITY_DN1368_c0_g1_i1_7	AWK21957.1	9.9e-44	88/141(62.41)	184	potassium channel subfamily K member 1-like protein, partial [Neoconocephalus triops]
TRINITY_DN13690_c0_g1_i1_3	XP_022899853.1	3.2e-169	321/654(49.08)	603	head-specific guanylate cyclase isoform X2 [Onthophagus taurus]
TRINITY_DN13693_c0_g1_i1_4	ADI59753.1	4.5e-40	87/144(60.42)	171	early cuticle protein 5 [Callinectes sapidus]
TRINITY_DN13694_c0_g1_i1_5	ODN02077.1	6.6e-90	157/287(54.70)	338	Lysosomal thioesterase PPT2 [Orchesella cincta]
TRINITY_DN13697_c0_g1_i1_6	KFD60298.1	4.5e-32	111/375(29.60)	146	hypothetical protein M514_27517 [Trichuris suis]
TRINITY_DN13701_c0_g1_i1_7	XP_026274316.1	6.3e-20	50/93(53.76)	105	uncharacterized protein LOC113203717 [Frankliniella occidentalis]
TRINITY_DN13702_c0_g1_i1_5	ACR54131.1	1.2e-31	64/72(88.89)	144	NADH dehydrogenase [Palaemon varians]
TRINITY_DN13708_c0_g1_i1_4	XP_018015228.1	6.9e-106	190/314(60.51)	391	PREDICTED: neuroligin-4, Y-linked-like [Hyalella azteca]
TRINITY_DN13710_c0_g1_i1_6	XP_021940070.1	7.7e-31	66/146(45.21)	141	uncharacterized protein LOC110839841 [Zootermopsis nevadensis]
TRINITY_DN13710_c0_g2_i1_6	XP_018909452.1	5.2e-10	41/91(45.05)	71	PREDICTED: uncharacterized protein LOC109038734 [Bemisia tabaci]
TRINITY_DN13711_c0_g1_i1_2	ADY38993.1	1.2e-50	93/114(81.58)	208	nuclear progesterone receptor [Penaeus monodon]
TRINITY_DN13714_c0_g1_i1_3	AAY86043.1	1.4e-10	39/86(45.35)	74	reverse transcriptase, partial [Nullibrotheas allenii]
TRINITY_DN13717_c0_g1_i1_3	XP_018027559.1	5.6e-14	59/196(30.10)	86	PREDICTED: uncharacterized protein LOC108682829 [Hyalella azteca]
TRINITY_DN13721_c0_g1_i2_5	PRD34630.1	2.9e-17	41/108(37.96)	96	Synaptic vesicle membrane protein VAT-1 [Nephila clavipes]
TRINITY_DN13725_c0_g1_i1_5	PIK55545.1	6.2e-17	50/105(47.62)	95	hypothetical protein BSL78_07550 [Apostichopus japonicus]
TRINITY_DN13725_c0_g1_i2_3	XP_013784145.1	3.8e-39	78/97(80.41)	171	Na(+)/H(+) exchange regulatory cofactor NHE-RF1-like [Limulus polyphemus]
TRINITY_DN13733_c0_g2_i1_5	XP_018010104.1	3.3e-84	174/343(50.73)	319	PREDICTED: uncharacterized protein LOC108667572 [Hyalella azteca]
TRINITY_DN13736_c0_g1_i1_2	XP_013775770.1	3.4e-22	60/120(50.00)	112	uncharacterized protein LOC106460599 [Limulus polyphemus]
TRINITY_DN1373_c0_g1_i1_7	XP_012153574.1	2.1e-22	53/103(51.46)	112	PREDICTED: RNA-directed DNA polymerase from mobile element jockey-like, partial [Megachile rotundata]
TRINITY_DN13743_c0_g1_i1_6	PRD29561.1	6.8e-117	201/330(60.91)	427	putative aarF domain-containing protein kinase 1 [Nephila clavipes]
TRINITY_DN13747_c0_g1_i1_2	PSN50794.1	1.2e-18	44/62(70.97)	100	Beta-1 [Blattella germanica]
TRINITY_DN13748_c0_g1_i1_4	XP_024938652.1	2.9e-134	235/294(79.93)	486	protein rhomboid isoform X2 [Cephus cinctus]
TRINITY_DN13755_c0_g1_i1_5	AEY84718.1	2.7e-55	111/122(90.98)	224	YIPF3-like protein, partial [Pandalus platyceros]
TRINITY_DN13757_c0_g1_i1_3	XP_023723581.1	2.2e-147	316/745(42.42)	530	diphthine--ammonia ligase isoform X2 [Cryptotermes secundus]
TRINITY_DN13757_c0_g1_i1_7	ADO00929.1	1.7e-230	375/482(77.80)	806	endoplasmic reticulum protein 57 [Penaeus monodon]
TRINITY_DN13759_c0_g1_i2_6	CFW94242.1	2.4e-158	397/1177(33.73)	567	Eka-PIP kinase protein [Euperipatoides kanangrensis]
TRINITY_DN13760_c0_g1_i1_6	XP_018014555.1	2.1e-37	70/151(46.36)	162	PREDICTED: uncharacterized protein LOC108671513 [Hyalella azteca]
TRINITY_DN13772_c0_g2_i1_7	XP_002602062.1	3.3e-39	119/344(34.59)	170	hypothetical protein BRAFLDRAFT_94436 [Branchiostoma floridae]
TRINITY_DN13773_c0_g1_i1_4	XP_023721325.1	1.3e-173	307/630(48.73)	617	uncharacterized protein KIAA2013 homolog isoform X1 [Cryptotermes secundus]
TRINITY_DN13773_c0_g1_i1_6	ABN58714.1	3.6e-34	94/267(35.21)	152	pol-like protein [Biomphalaria glabrata]
TRINITY_DN13773_c1_g1_i1_6	XP_023312337.1	2.1e-25	58/101(57.43)	122	uncharacterized protein LOC111692524 [Anoplophora glabripennis]
TRINITY_DN13773_c1_g2_i1_6	KFM61834.1	8.0e-41	92/275(33.45)	174	RNA-directed DNA polymerase from mobile element jockey, partial [Stegodyphus mimosarum]
TRINITY_DN13773_c1_g3_i1_6	XP_025190911.1	2.8e-18	52/122(42.62)	99	uncharacterized protein LOC112591338 [Melanaphis sacchari]
TRINITY_DN13778_c0_g1_i5_7	XP_026284996.1	4.8e-41	260/765(33.99)	177	golgin subfamily A member 1 [Frankliniella occidentalis]
TRINITY_DN13779_c0_g1_i1_4	XP_017046323.1	2.4e-24	51/98(52.04)	119	PREDICTED: NADH dehydrogenase [ubiquinone] iron-sulfur protein 5 [Drosophila ficusphila]
TRINITY_DN1377_c0_g1_i1_6	XP_018022422.1	2.3e-80	196/554(35.38)	307	PREDICTED: uncharacterized protein LOC108678485 [Hyalella azteca]
TRINITY_DN13782_c0_g1_i1_8	XP_021940334.1	6.7e-93	160/217(73.73)	347	leishmanolysin-like peptidase [Zootermopsis nevadensis]
TRINITY_DN13782_c0_g1_i2_3	XP_018015797.1	1.5e-71	138/232(59.48)	278	PREDICTED: uncharacterized protein LOC108672609 [Hyalella azteca]
TRINITY_DN13784_c0_g1_i1_5	XP_023216982.1	4.0e-70	201/616(32.63)	273	fucose-1-phosphate guanylyltransferase-like [Centruroides sculpturatus]
TRINITY_DN13786_c0_g1_i1_4	XP_021914374.1	2.1e-37	81/170(47.65)	162	solute carrier family 12 member 8 [Zootermopsis nevadensis]
TRINITY_DN13787_c0_g1_i1_5	XP_018025120.1	2.1e-12	39/68(57.35)	79	PREDICTED: uncharacterized protein LOC108680740 [Hyalella azteca]
TRINITY_DN13787_c0_g1_i3_6	AAV85443.1	4.9e-22	68/181(37.57)	112	reverse transcriptase-like protein, partial [Amblyomma americanum]
TRINITY_DN13788_c0_g1_i1_2	ELU06162.1	9.1e-09	40/141(28.37)	70	hypothetical protein CAPTEDRAFT_227534 [Capitella teleta]
TRINITY_DN13790_c0_g1_i2_8	XP_018024104.1	5.7e-11	37/85(43.53)	75	PREDICTED: nephrin-like isoform X1 [Hyalella azteca]
TRINITY_DN13794_c0_g1_i1_5	XP_017783932.1	7.0e-56	102/143(71.33)	224	PREDICTED: 28S ribosomal protein S24, mitochondrial [Nicrophorus vespilloides]
TRINITY_DN13795_c0_g1_i1_5	XP_021419774.1	3.3e-14	78/336(23.21)	86	zinc finger protein 420-like [Oncorhynchus mykiss]
TRINITY_DN13802_c0_g1_i1_6	XP_018020180.1	1.6e-21	52/145(35.86)	110	PREDICTED: uncharacterized protein LOC108676591 [Hyalella azteca]
TRINITY_DN1380_c0_g1_i1_3	XP_023711780.1	2.0e-27	175/202(86.63)	130	F-box/LRR-repeat protein 14 [Cryptotermes secundus]
TRINITY_DN1380_c0_g1_i1_5	ELU05953.1	1.4e-06	36/86(41.86)	62	hypothetical protein CAPTEDRAFT_202466 [Capitella teleta]
TRINITY_DN13811_c0_g2_i1_5	AVN99054.1	4.3e-243	419/707(59.26)	848	epithelial chloride channel protein-like, partial [Procambarus clarkii]
TRINITY_DN13813_c0_g1_i1_6	XP_022830476.1	4.2e-07	35/126(27.78)	64	gastrula zinc finger protein XlCGF26.1-like [Spodoptera litura]
TRINITY_DN13815_c0_g1_i2_5	AKM12294.1	6.8e-151	261/281(92.88)	542	abdominal-B [Penaeus vannamei]
TRINITY_DN13816_c0_g1_i1_3	XP_018025277.1	1.2e-30	70/144(48.61)	140	PREDICTED: Down syndrome cell adhesion molecule-like protein Dscam2 [Hyalella azteca]
TRINITY_DN13822_c0_g1_i1_5	XP_023216113.1	1.0e-48	92/146(63.01)	200	uncharacterized protein LOC111618774 [Centruroides sculpturatus]
TRINITY_DN1382_c0_g1_i1_6	OQV14247.1	1.6e-06	31/65(47.69)	59	putative Alpha-(1,3)-fucosyltransferase C [Hypsibius dujardini]
TRINITY_DN13830_c0_g1_i1_6	XP_021918301.1	8.2e-36	76/120(63.33)	157	uncharacterized protein LOC110829162, partial [Zootermopsis nevadensis]
TRINITY_DN13834_c0_g1_i1_6	ALJ10568.1	1.1e-62	117/117(100.00)	247	rhodanese 1-like protein [Macrobrachium nipponense]
TRINITY_DN13835_c0_g1_i1_6	AUS76950.1	8.2e-87	219/278(78.78)	328	GATA-like protein, partial [Eriocheir sinensis]
TRINITY_DN13842_c0_g1_i2_8	XP_023704788.1	1.7e-95	167/263(63.50)	357	complex I intermediate-associated protein 30, mitochondrial [Cryptotermes secundus]
TRINITY_DN13847_c0_g1_i1_6	XP_023609223.1	7.0e-47	90/106(84.91)	193	tigger transposable element-derived protein 1 isoform X1 [Myotis lucifugus]
TRINITY_DN13848_c0_g1_i1_6	XP_018018696.1	7.4e-54	117/230(50.87)	219	PREDICTED: uncharacterized protein LOC108675217 [Hyalella azteca]
TRINITY_DN13849_c0_g1_i1_2	XP_013400475.1	9.5e-286	463/817(56.67)	991	dimethylglycine dehydrogenase, mitochondrial isoform X2 [Lingula anatina]
TRINITY_DN13850_c0_g1_i1_3	XP_019640293.1	9.1e-78	176/470(37.45)	298	PREDICTED: diaminopimelate decarboxylase 1, chloroplastic-like [Branchiostoma belcheri]
TRINITY_DN13851_c0_g1_i1_6	XP_018027570.1	3.4e-21	65/145(44.83)	110	PREDICTED: PAXIP1-associated glutamate-rich protein 1-like [Hyalella azteca]
TRINITY_DN13852_c0_g1_i1_3	XP_021926181.1	1.6e-57	120/293(40.96)	230	synaptotagmin-5-like isoform X1 [Zootermopsis nevadensis]
TRINITY_DN13859_c0_g1_i1_6	XP_018021113.1	1.4e-49	81/124(65.32)	203	PREDICTED: CUB and sushi domain-containing protein 1-like, partial [Hyalella azteca]
TRINITY_DN13860_c0_g1_i1_5	XP_023727374.1	2.1e-147	257/444(57.88)	530	tyrosine--tRNA ligase, mitochondrial [Cryptotermes secundus]
TRINITY_DN13870_c0_g1_i1_1	XP_023209443.1	2.6e-32	76/125(60.80)	147	60S ribosomal protein L22-like [Centruroides sculpturatus]
TRINITY_DN13870_c0_g1_i1_2	BAM99303.1	1.2e-47	102/151(67.55)	196	strongly chitin-binding protein-1 [Procambarus clarkii]
TRINITY_DN13870_c0_g1_i1_5	XP_018013190.1	6.3e-18	54/95(56.84)	99	PREDICTED: equilibrative nucleoside transporter 2-like [Hyalella azteca]
TRINITY_DN13873_c0_g1_i1_6	AHK23026.1	0.0e+00	1257/3047(41.25)	2387	beta-1,3-glucan-binding protein precursor [Astacus astacus]
TRINITY_DN13874_c0_g1_i1_7	XP_018024135.1	5.8e-69	128/164(78.05)	267	PREDICTED: sodium- and chloride-dependent glycine transporter 1-like [Hyalella azteca]
TRINITY_DN13874_c0_g2_i1_7	XP_018024135.1	9.5e-77	144/228(63.16)	294	PREDICTED: sodium- and chloride-dependent glycine transporter 1-like [Hyalella azteca]
TRINITY_DN13880_c0_g1_i1_6	XP_018019647.1	3.8e-62	126/258(48.84)	245	PREDICTED: alpha-(1,3)-fucosyltransferase C-like isoform X1 [Hyalella azteca]
TRINITY_DN13882_c0_g1_i1_6	XP_018015467.1	2.6e-41	110/329(33.43)	177	PREDICTED: uncharacterized protein LOC108672335, partial [Hyalella azteca]
TRINITY_DN13891_c0_g1_i1_4	ASK05860.1	3.5e-33	70/104(67.31)	150	chitin-binding protein, partial [Macrobrachium nipponense]
TRINITY_DN13894_c0_g1_i1_6	XP_022160033.1	9.8e-37	100/272(36.76)	161	uncharacterized protein LOC111026288 [Myzus persicae]
TRINITY_DN13894_c0_g2_i1_6	XP_022198016.1	8.3e-09	30/55(54.55)	67	uncharacterized protein LOC111055156 [Nilaparvata lugens]
TRINITY_DN13895_c0_g1_i1_1	XP_018019186.1	4.9e-81	149/198(75.25)	310	PREDICTED: smad nuclear-interacting protein 1-like [Hyalella azteca]
TRINITY_DN13895_c0_g1_i1_3	XP_018007847.1	2.5e-68	137/325(42.15)	266	PREDICTED: transmembrane protein 53-like isoform X1 [Hyalella azteca]
TRINITY_DN1389_c0_g1_i1_2	XP_018012839.1	1.4e-135	230/369(62.33)	490	PREDICTED: peroxisomal (S)-2-hydroxy-acid oxidase GLO3-like isoform X1 [Hyalella azteca]
TRINITY_DN13906_c0_g1_i1_3	ABQ41248.1	7.9e-185	443/529(83.74)	654	male reproductive-related microfibril-associated protein [Macrobrachium rosenbergii]
TRINITY_DN13907_c0_g1_i1_5	XP_018018013.1	2.3e-101	221/488(45.29)	377	PREDICTED: prolactin regulatory element-binding protein-like [Hyalella azteca]
TRINITY_DN13907_c0_g1_i1_6	PNF14530.1	5.8e-15	46/131(35.11)	88	hypothetical protein B7P43_G15458 [Cryptotermes secundus]
TRINITY_DN13908_c0_g1_i2_6	XP_018009398.1	4.2e-61	136/321(42.37)	242	PREDICTED: echinoderm microtubule-associated protein-like 5 [Hyalella azteca]
TRINITY_DN13908_c0_g2_i1_2	XP_023015546.1	4.9e-92	169/273(61.90)	346	gamma-soluble NSF attachment protein [Leptinotarsa decemlineata]
TRINITY_DN13910_c0_g2_i1_6	XP_002604894.1	1.5e-113	214/411(52.07)	417	hypothetical protein BRAFLDRAFT_77273 [Branchiostoma floridae]
TRINITY_DN13914_c0_g1_i1_5	KOF80294.1	1.9e-47	96/130(73.85)	196	hypothetical protein OCBIM_22028168mg, partial [Octopus bimaculoides]
TRINITY_DN13914_c0_g2_i1_5	KMQ89919.1	2.2e-27	63/175(36.00)	129	hypothetical protein RF55_10387 [Lasius niger]
TRINITY_DN13915_c0_g1_i2_4	KRX12216.1	4.0e-23	62/115(53.91)	115	Non-specific lipid-transfer protein [Trichinella nelsoni]
TRINITY_DN13916_c0_g1_i1_6	XP_013779577.1	4.5e-156	250/300(83.33)	558	serine/threonine-protein phosphatase 6 catalytic subunit isoform X1 [Limulus polyphemus]
TRINITY_DN13917_c0_g1_i1_3	XP_019555972.1	4.1e-172	327/639(51.17)	612	PREDICTED: multidrug resistance-associated protein 1 isoform X2 [Aedes albopictus]
TRINITY_DN13917_c0_g2_i1_3	XP_023209485.1	6.7e-46	110/334(32.93)	192	multidrug resistance-associated protein 1-like [Centruroides sculpturatus]
TRINITY_DN13917_c0_g3_i1_3	XP_023319285.1	5.2e-154	281/543(51.75)	552	multidrug resistance-associated protein 1 isoform X7 [Trichogramma pretiosum]
TRINITY_DN13919_c0_g1_i1_8	OWF47171.1	6.5e-07	35/111(31.53)	61	RNA-directed DNA polymerase from transposon BS [Mizuhopecten yessoensis]
TRINITY_DN13921_c0_g1_i1_8	PIK44742.1	8.6e-10	36/88(40.91)	71	hypothetical protein BSL78_18414 [Apostichopus japonicus]
TRINITY_DN13923_c0_g2_i1_3	AIS36112.1	3.5e-63	136/353(38.53)	250	C-type lectin [Palaemon carinicauda]
TRINITY_DN13926_c0_g1_i1_6	XP_018006831.1	2.5e-65	131/239(54.81)	257	PREDICTED: uncharacterized protein LOC108664677 [Hyalella azteca]
TRINITY_DN13929_c0_g1_i1_5	XP_018025831.1	3.7e-68	126/198(63.64)	266	PREDICTED: uncharacterized protein C6orf106 homolog [Hyalella azteca]
TRINITY_DN13931_c0_g1_i1_6	KXJ18460.1	1.6e-45	104/303(34.32)	191	hypothetical protein AC249_AIPGENE27992 [Exaiptasia pallida]
TRINITY_DN13937_c0_g1_i1_6	XP_023014849.1	7.9e-13	49/176(27.84)	83	uncharacterized protein LOC111504516 [Leptinotarsa decemlineata]
TRINITY_DN13938_c0_g1_i1_4	XP_023241135.1	5.1e-11	41/84(48.81)	74	uncharacterized protein LOC111639474 [Centruroides sculpturatus]
TRINITY_DN13938_c0_g1_i1_6	AEL33282.2	8.7e-84	148/198(74.75)	317	opsin protein [Charybdis japonica]
TRINITY_DN13943_c0_g1_i2_5	XP_018914733.1	3.9e-247	444/814(54.55)	862	PREDICTED: glycine--tRNA ligase [Bemisia tabaci]
TRINITY_DN13944_c0_g1_i1_8	XP_018011569.1	2.9e-16	52/123(42.28)	94	PREDICTED: mediator of RNA polymerase II transcription subunit 16-like [Hyalella azteca]
TRINITY_DN13946_c0_g1_i1_6	XP_018011799.1	7.7e-147	520/1182(43.99)	529	PREDICTED: S phase cyclin A-associated protein in the endoplasmic reticulum-like [Hyalella azteca]
TRINITY_DN13946_c1_g1_i1_7	KFM64962.1	3.3e-33	70/135(51.85)	148	putative RNA-directed DNA polymerase from transposon X-element, partial [Stegodyphus mimosarum]
TRINITY_DN13950_c0_g1_i1_8	XP_018019077.1	1.2e-54	111/163(68.10)	220	PREDICTED: uncharacterized protein LOC108675566 [Hyalella azteca]
TRINITY_DN13952_c0_g1_i1_6	XP_022245126.1	5.4e-52	103/199(51.76)	213	ras-related and estrogen-regulated growth inhibitor-like isoform X1 [Limulus polyphemus]
TRINITY_DN13955_c0_g1_i1_5	XP_018019337.1	2.1e-120	189/365(51.78)	439	PREDICTED: protocadherin-like wing polarity protein stan [Hyalella azteca]
TRINITY_DN13955_c0_g1_i1_6	XP_018009077.1	4.5e-38	90/223(40.36)	165	PREDICTED: uncharacterized protein LOC108666671 [Hyalella azteca]
TRINITY_DN13956_c0_g1_i1_5	XP_018014100.1	4.2e-116	240/475(50.53)	426	PREDICTED: protein dopey-1-like [Hyalella azteca]
TRINITY_DN13961_c0_g1_i1_5	XP_023718359.1	2.9e-180	426/1107(38.48)	640	tectonin beta-propeller repeat-containing protein isoform X2 [Cryptotermes secundus]
TRINITY_DN13965_c0_g1_i1_8	XP_013774375.1	4.6e-24	59/139(42.45)	119	uncharacterized protein LOC106459310 [Limulus polyphemus]
TRINITY_DN13968_c0_g1_i1_7	AFN20598.1	1.5e-163	266/317(83.91)	583	lectin 2 [Macrobrachium rosenbergii]
TRINITY_DN13975_c0_g4_i1_2	XP_017781384.1	2.9e-19	63/189(33.33)	102	PREDICTED: protein pigeon [Nicrophorus vespilloides]
TRINITY_DN13976_c0_g1_i1_4	ABR21646.1	1.8e-109	191/197(96.95)	402	elongation factor 1-alpha, partial [Bacillus rossius redtenbacheri]
TRINITY_DN13976_c0_g3_i1_4	AAH80974.1	4.5e-80	139/170(81.76)	304	LOC493206 protein, partial [Xenopus tropicalis]
TRINITY_DN13978_c0_g1_i1_6	ARK36625.1	6.3e-57	119/183(65.03)	228	relaxin-receptor 1 [Sagmariasus verreauxi]
TRINITY_DN13979_c0_g2_i1_1	XP_021930339.1	1.2e-09	32/49(65.31)	70	transmembrane protein 141 [Zootermopsis nevadensis]
TRINITY_DN13981_c0_g1_i1_3	XP_015606364.1	4.5e-15	51/115(44.35)	88	cadherin-99C isoform X1 [Cephus cinctus]
TRINITY_DN13981_c0_g2_i1_3	XP_015606364.1	1.3e-69	132/244(54.10)	270	cadherin-99C isoform X1 [Cephus cinctus]
TRINITY_DN13986_c0_g1_i1_5	KFD67245.1	2.9e-08	26/53(49.06)	67	hypothetical protein M514_05095 [Trichuris suis]
TRINITY_DN13991_c0_g1_i1_6	XP_012260765.1	3.8e-139	310/654(47.40)	503	signal recognition particle subunit SRP72 [Athalia rosae]
TRINITY_DN13992_c0_g1_i1_5	XP_018016545.1	1.1e-13	44/95(46.32)	84	PREDICTED: uncharacterized protein LOC108673255 [Hyalella azteca]
TRINITY_DN13992_c0_g2_i1_5	XP_018016545.1	2.2e-09	40/146(27.40)	70	PREDICTED: uncharacterized protein LOC108673255 [Hyalella azteca]
TRINITY_DN13997_c0_g1_i1_1	XP_023165205.1	1.1e-10	40/88(45.45)	74	uncharacterized protein LOC111595627 [Drosophila hydei]
TRINITY_DN14002_c0_g1_i2_3	XP_011553766.1	6.3e-14	37/70(52.86)	84	PREDICTED: uncharacterized protein LOC105385141 [Plutella xylostella]
TRINITY_DN14004_c0_g1_i3_3	XP_019879302.1	4.5e-48	92/148(62.16)	200	PREDICTED: E3 ubiquitin-protein ligase rnf146-like [Aethina tumida]
TRINITY_DN14016_c0_g1_i1_6	XP_021934040.1	3.6e-21	59/97(60.82)	109	synaptotagmin-14 isoform X1 [Zootermopsis nevadensis]
TRINITY_DN14017_c0_g1_i1_5	XP_018020726.1	4.6e-17	48/114(42.11)	95	PREDICTED: probable ATP-dependent helicase PF08_0048 [Hyalella azteca]
TRINITY_DN14018_c0_g1_i1_8	XP_018016046.1	2.6e-50	163/407(40.05)	207	PREDICTED: uncharacterized protein LOC108672816 [Hyalella azteca]
TRINITY_DN14020_c0_g1_i1_2	XP_018025700.1	5.4e-08	29/35(82.86)	65	PREDICTED: irregular chiasm C-roughest protein-like [Hyalella azteca]
TRINITY_DN14024_c0_g1_i1_6	PFX24525.1	1.1e-15	41/70(58.57)	90	Retrovirus-related Pol polyprotein from transposon gypsy [Stylophora pistillata]
TRINITY_DN14026_c0_g1_i2_6	PSN32364.1	8.3e-21	65/201(32.34)	108	hypothetical protein C0J52_16802 [Blattella germanica]
TRINITY_DN14026_c0_g2_i1_6	KZS13105.1	8.1e-60	120/263(45.63)	238	Uncharacterized protein APZ42_021848 [Daphnia magna]
TRINITY_DN14028_c0_g1_i1_8	XP_018009456.1	4.2e-60	127/244(52.05)	240	PREDICTED: deoxyribonuclease-1-like [Hyalella azteca]
TRINITY_DN14029_c0_g1_i2_3	XP_021922108.1	1.4e-264	763/1486(51.35)	921	death-associated protein kinase 1-like [Zootermopsis nevadensis]
TRINITY_DN14033_c0_g2_i1_3	XP_018019422.1	2.8e-138	321/693(46.32)	500	PREDICTED: protein spire-like [Hyalella azteca]
TRINITY_DN14036_c0_g1_i1_8	XP_018022822.1	4.4e-25	56/94(59.57)	122	PREDICTED: matrix metalloproteinase-2-like [Hyalella azteca]
TRINITY_DN14040_c0_g1_i1_4	XP_025835797.1	1.3e-235	427/639(66.82)	823	ATP-binding cassette sub-family B member 7, mitochondrial [Agrilus planipennis]
TRINITY_DN14043_c0_g1_i1_4	XP_018019513.1	9.1e-21	60/134(44.78)	109	PREDICTED: uncharacterized protein LOC108675968 [Hyalella azteca]
TRINITY_DN14043_c0_g2_i1_3	XP_013400181.1	9.2e-166	292/695(42.01)	591	N-acetylated-alpha-linked acidic dipeptidase 2 [Lingula anatina]
TRINITY_DN14049_c0_g1_i1_8	XP_018021417.1	2.3e-32	67/128(52.34)	146	PREDICTED: organic cation transporter-like protein isoform X1 [Hyalella azteca]
TRINITY_DN14051_c0_g1_i1_7	ABG01800.1	3.3e-49	100/173(57.80)	202	putative accessory gland protein, partial [Gryllus bimaculatus]
TRINITY_DN14062_c0_g1_i1_8	XP_022837847.1	4.3e-156	389/726(53.58)	559	CCR4-NOT transcription complex subunit 3 isoform X5 [Spodoptera litura]
TRINITY_DN14064_c0_g1_i1_3	XP_021924809.1	8.3e-119	264/734(35.97)	435	centromere/kinetochore protein zw10 homolog isoform X2 [Zootermopsis nevadensis]
TRINITY_DN14074_c0_g1_i1_6	XP_006123994.1	6.6e-17	50/64(78.12)	95	tigger transposable element-derived protein 1-like [Pelodiscus sinensis]
TRINITY_DN14075_c0_g1_i1_3	XP_021927787.1	9.2e-84	164/213(77.00)	319	programmed cell death protein 10 [Zootermopsis nevadensis]
TRINITY_DN14077_c0_g1_i1_6	XP_023705075.1	5.1e-36	84/217(38.71)	159	COMM domain-containing protein 2 isoform X1 [Cryptotermes secundus]
TRINITY_DN14083_c0_g2_i1_4	XP_023715291.1	1.3e-242	394/510(77.25)	847	cGMP-dependent protein kinase, isozyme 1-like isoform X2 [Cryptotermes secundus]
TRINITY_DN14086_c0_g1_i1_3	XP_018009768.1	2.0e-40	83/148(56.08)	173	PREDICTED: alpha-tocopherol transfer protein-like [Hyalella azteca]
TRINITY_DN14088_c0_g1_i1_3	XP_018018465.1	7.2e-35	235/705(33.33)	156	PREDICTED: uncharacterized threonine-rich GPI-anchored glycoprotein PJ4664.02-like [Hyalella azteca]
TRINITY_DN14089_c0_g1_i1_7	AKT09427.1	3.3e-23	49/115(42.61)	115	macrophage migration inhibitory factor MIF1 [Scylla paramamosain]
TRINITY_DN14104_c0_g2_i1_2	XP_018011929.1	4.4e-11	90/141(63.83)	75	PREDICTED: eyes absent homolog 2-like [Hyalella azteca]
TRINITY_DN14107_c0_g1_i2_6	RLQ69526.1	1.6e-06	31/68(45.59)	60	VAMP4, partial [Cricetulus griseus]
TRINITY_DN1410_c0_g1_i1_3	XP_011547881.1	2.7e-14	40/80(50.00)	87	PREDICTED: uncharacterized protein LOC105380083 [Plutella xylostella]
TRINITY_DN14110_c0_g1_i1_4	XP_022238054.1	1.2e-37	84/101(83.17)	164	transcription factor SUM-1-like [Limulus polyphemus]
TRINITY_DN14111_c0_g1_i1_7	OXA57238.1	1.8e-37	67/109(61.47)	162	Uricase [Folsomia candida]
TRINITY_DN14114_c0_g1_i2_6	KZS15771.1	3.1e-06	35/74(47.30)	60	M-phase phosphoprotein 8 [Daphnia magna]
TRINITY_DN14117_c0_g2_i1_3	XP_018007190.1	5.3e-109	192/407(47.17)	402	PREDICTED: uncharacterized protein LOC108664990 [Hyalella azteca]
TRINITY_DN14117_c0_g3_i1_3	XP_018007190.1	6.9e-53	101/189(53.44)	214	PREDICTED: uncharacterized protein LOC108664990 [Hyalella azteca]
TRINITY_DN14121_c0_g1_i1_6	XP_022163300.1	2.6e-12	61/246(24.80)	80	uncharacterized protein LOC111028848 isoform X1 [Myzus persicae]
TRINITY_DN14126_c0_g1_i1_7	XP_018009833.1	1.7e-17	58/120(48.33)	98	PREDICTED: mucin-19-like isoform X1 [Hyalella azteca]
TRINITY_DN14126_c0_g2_i1_5	APC26114.1	4.7e-11	33/33(100.00)	74	metabotropic glutamate receptor type 1 [Homarus americanus]
TRINITY_DN14129_c0_g1_i1_2	XP_018008452.1	3.8e-14	39/94(41.49)	85	PREDICTED: venom protein 302-like isoform X2 [Hyalella azteca]
TRINITY_DN14131_c0_g1_i1_3	XP_013858373.1	1.1e-60	124/298(41.61)	241	PREDICTED: piggyBac transposable element-derived protein 3-like [Austrofundulus limnaeus]
TRINITY_DN14131_c0_g2_i1_3	XP_019772286.1	3.0e-20	53/127(41.73)	106	PREDICTED: piggyBac transposable element-derived protein 3-like isoform X1 [Dendroctonus ponderosae]
TRINITY_DN14131_c0_g3_i1_3	XP_022205093.1	5.4e-20	47/79(59.49)	104	uncharacterized protein LOC111061707 [Nilaparvata lugens]
TRINITY_DN14134_c0_g1_i1_4	XP_023954522.1	3.6e-29	64/114(56.14)	136	spondin-2 [Bicyclus anynana]
TRINITY_DN14142_c0_g1_i1_7	ALC78852.1	1.1e-238	414/538(76.95)	833	alkaline phosphatase [Penaeus vannamei]
TRINITY_DN14143_c0_g1_i3_3	XP_018014546.1	3.2e-10	100/409(24.45)	75	PREDICTED: uncharacterized protein LOC108671504 [Hyalella azteca]
TRINITY_DN14144_c0_g1_i1_8	CUV66659.1	8.4e-81	135/289(46.71)	308	C-type lectine [Scylla paramamosain]
TRINITY_DN14146_c0_g1_i1_6	XP_026816532.1	3.2e-165	267/470(56.81)	589	uncharacterized protein LOC113556030 [Rhopalosiphum maidis]
TRINITY_DN14149_c0_g1_i1_3	XP_013788047.1	4.9e-88	146/249(58.63)	332	probable 39S ribosomal protein L24, mitochondrial [Limulus polyphemus]
TRINITY_DN1414_c0_g1_i1_1	KDR18514.1	5.9e-19	61/96(63.54)	101	Protein ECT2 [Zootermopsis nevadensis]
TRINITY_DN14150_c0_g1_i3_3	XP_791749.3	2.2e-101	199/376(52.93)	377	PREDICTED: N-glycosylase/DNA lyase isoform X2 [Strongylocentrotus purpuratus]
TRINITY_DN14152_c0_g1_i1_6	KDR19576.1	1.0e-75	151/291(51.89)	291	DNA-directed RNA polymerase III subunit RPC6 [Zootermopsis nevadensis]
TRINITY_DN14155_c0_g1_i1_2	XP_018009277.1	1.1e-91	169/240(70.42)	344	PREDICTED: L-xylulose reductase-like [Hyalella azteca]
TRINITY_DN14155_c0_g1_i1_3	XP_018007529.1	1.6e-53	122/247(49.39)	217	PREDICTED: uncharacterized protein LOC108665302 [Hyalella azteca]
TRINITY_DN1415_c0_g1_i1_5	PIK41115.1	9.0e-19	59/157(37.58)	100	putative zinc finger MYM-type protein 1-like [Apostichopus japonicus]
TRINITY_DN1415_c0_g2_i1_5	XP_006820682.1	1.8e-08	39/110(35.45)	66	PREDICTED: zinc finger MYM-type protein 1-like [Saccoglossus kowalevskii]
TRINITY_DN14165_c0_g1_i1_6	XP_013784932.1	1.7e-67	134/270(49.63)	264	lys-63-specific deubiquitinase BRCC36-like isoform X1 [Limulus polyphemus]
TRINITY_DN14166_c0_g1_i1_6	OXA43588.1	9.9e-12	33/97(34.02)	77	Organic cation transporter-like protein [Folsomia candida]
TRINITY_DN14168_c0_g1_i2_4	AJC52502.1	1.3e-44	91/202(45.05)	187	estrogen sulfotransferase [Scylla olivacea]
TRINITY_DN1416_c0_g1_i1_6	XP_025425717.1	8.3e-24	61/154(39.61)	119	uncharacterized protein LOC112694470 [Sipha flava]
TRINITY_DN14170_c0_g2_i1_4	XP_013382959.1	1.3e-41	85/170(50.00)	177	uncharacterized protein LOC106153529 [Lingula anatina]
TRINITY_DN14172_c0_g1_i1_6	PNF31094.1	2.9e-67	168/444(37.84)	264	Ancient ubiquitous protein 1 [Cryptotermes secundus]
TRINITY_DN14178_c0_g1_i1_6	XP_018011459.1	2.3e-55	271/654(41.44)	224	PREDICTED: zinc finger protein 521-like [Hyalella azteca]
TRINITY_DN14179_c0_g1_i1_3	XP_022243709.1	9.8e-246	486/1120(43.39)	857	nuclear pore complex protein Nup133-like [Limulus polyphemus]
TRINITY_DN14181_c0_g1_i1_6	XP_017783779.1	3.0e-153	261/406(64.29)	549	PREDICTED: elongation factor Tu [Nicrophorus vespilloides]
TRINITY_DN14187_c0_g1_i1_6	PKU28496.1	9.1e-14	36/105(34.29)	86	sphingosine-1-phosphate lyase hypothetical protein [Limosa lapponica baueri]
TRINITY_DN14189_c0_g1_i2_6	XP_022241736.1	3.9e-07	54/186(29.03)	63	uncharacterized protein LOC106459526 isoform X1 [Limulus polyphemus]
TRINITY_DN14199_c0_g1_i1_8	XP_018007004.1	1.5e-112	197/271(72.69)	413	PREDICTED: proteasome subunit beta type-7-like [Hyalella azteca]
TRINITY_DN14207_c0_g1_i1_2	AYF59253.1	1.5e-147	295/427(69.09)	530	tyrosine-protein phosphatase non-receptor type 2 [Penaeus monodon]
TRINITY_DN14207_c0_g1_i1_8	XP_026321598.1	1.1e-06	41/123(33.33)	60	Ig-like and fibronectin type-III domain-containing protein 2 [Hyposmocoma kahamanoa]
TRINITY_DN14208_c0_g1_i1_5	XP_020906008.1	3.6e-10	49/158(31.01)	72	uncharacterized protein LOC110244161 [Exaiptasia pallida]
TRINITY_DN14209_c0_g1_i1_3	AHE41086.1	9.8e-101	195/242(80.58)	374	zinc transporter ZIP1, partial [Callinectes sapidus]
TRINITY_DN14212_c0_g1_i1_4	PSN41945.1	5.7e-112	252/686(36.73)	412	hypothetical protein C0J52_06418 [Blattella germanica]
TRINITY_DN14213_c0_g1_i1_3	PKU42967.1	1.3e-18	68/178(38.20)	100	hypothetical protein llap_6728 [Limosa lapponica baueri]
TRINITY_DN14217_c0_g1_i1_1	AAV28479.1	9.2e-15	38/52(73.08)	87	calcified cuticle protein CP8.2 [Callinectes sapidus]
TRINITY_DN14217_c0_g1_i2_3	XP_021932607.1	7.5e-46	103/272(37.87)	193	replication protein A 32 kDa subunit [Zootermopsis nevadensis]
TRINITY_DN14218_c0_g1_i1_3	XP_002412610.1	3.1e-115	209/344(60.76)	423	sorbitol dehydrogenase, putative [Ixodes scapularis]
TRINITY_DN14219_c0_g1_i2_6	XP_018014439.1	1.1e-08	64/217(29.49)	70	PREDICTED: mucin-5AC-like [Hyalella azteca]
TRINITY_DN14226_c0_g1_i2_3	KZS08528.1	2.2e-74	160/408(39.22)	287	Cytochrome P450 27C1 [Daphnia magna]
TRINITY_DN14227_c0_g1_i1_2	KDR17167.1	5.9e-166	371/926(40.06)	592	Nuclear receptor interaction protein [Zootermopsis nevadensis]
TRINITY_DN14228_c0_g1_i1_6	XP_018021837.1	8.8e-26	62/106(58.49)	123	PREDICTED: uncharacterized protein LOC108678018 [Hyalella azteca]
TRINITY_DN14228_c0_g2_i1_5	XP_023248292.1	8.5e-13	47/92(51.09)	82	uncharacterized protein LOC106644996 [Copidosoma floridanum]
TRINITY_DN14232_c0_g1_i1_6	XP_018024141.1	4.7e-76	123/241(51.04)	292	PREDICTED: UDP-glucuronosyltransferase-like [Hyalella azteca]
TRINITY_DN14234_c0_g1_i1_6	XP_018015889.1	1.0e-206	365/388(94.07)	726	PREDICTED: 26S protease regulatory subunit 10B [Hyalella azteca]
TRINITY_DN14236_c0_g1_i1_1	prf||2013359A	1.4e-14	36/88(40.91)	86	transposase
TRINITY_DN14238_c0_g1_i2_5	XP_018024017.1	0.0e+00	584/1159(50.39)	1080	PREDICTED: coronin-7-like [Hyalella azteca]
TRINITY_DN1423_c0_g1_i1_1	XP_005108692.1	1.7e-23	65/175(37.14)	116	PREDICTED: uncharacterized protein LOC101863378 [Aplysia californica]
TRINITY_DN1423_c0_g1_i1_3	XP_026477640.1	4.1e-26	65/115(56.52)	124	integrin alpha-PS1-like [Ctenocephalides felis]
TRINITY_DN14243_c0_g1_i1_7	BAM35674.1	8.2e-31	76/221(34.39)	142	putative reverse transcriptase [Penaeus japonicus]
TRINITY_DN14252_c0_g2_i2_6	XP_013785676.1	5.0e-110	177/307(57.65)	406	epimerase family protein SDR39U1-like [Limulus polyphemus]
TRINITY_DN14261_c0_g1_i2_5	ACM09992.1	8.8e-124	253/321(78.82)	451	hypothetical ANK-like protein [Eriocheir sinensis]
TRINITY_DN14265_c0_g1_i1_1	XP_018014689.1	1.3e-174	305/403(75.68)	620	PREDICTED: uncharacterized protein LOC108671632 [Hyalella azteca]
TRINITY_DN14267_c0_g1_i1_2	ODM87033.1	6.0e-29	71/135(52.59)	134	ATP-dependent DNA helicase PIF1 [Orchesella cincta]
TRINITY_DN14275_c0_g1_i2_6	XP_018006773.1	2.4e-11	38/83(45.78)	78	PREDICTED: longitudinals lacking protein, isoforms H/M/V-like isoform X13 [Hyalella azteca]
TRINITY_DN14278_c0_g2_i1_6	XP_021928258.1	4.5e-31	62/81(76.54)	141	LOW QUALITY PROTEIN: serine/threonine-protein kinase dyf-5 [Zootermopsis nevadensis]
TRINITY_DN14280_c0_g1_i1_6	XP_018027757.1	2.3e-182	363/616(58.93)	646	PREDICTED: N6-adenosine-methyltransferase subunit METTL3-like isoform X1 [Hyalella azteca]
TRINITY_DN14280_c0_g1_i1_7	XP_013416966.1	1.7e-16	40/131(30.53)	94	uncharacterized protein LOC106178366 [Lingula anatina]
TRINITY_DN14282_c0_g1_i1_4	XP_015911453.1	1.6e-63	145/383(37.86)	251	nucleoside diphosphate-linked moiety X motif 19 [Parasteatoda tepidariorum]
TRINITY_DN14284_c0_g1_i1_2	XP_018012524.1	1.0e-10	36/73(49.32)	75	PREDICTED: protein tramtrack, beta isoform-like isoform X11 [Hyalella azteca]
TRINITY_DN14286_c0_g1_i1_3	XP_013782612.1	1.8e-97	168/347(48.41)	364	dnaJ homolog subfamily C member 22-like [Limulus polyphemus]
TRINITY_DN14290_c0_g1_i1_2	XP_013793607.1	2.7e-84	142/298(47.65)	320	post-GPI attachment to proteins factor 3-like [Limulus polyphemus]
TRINITY_DN14291_c0_g1_i1_3	XP_012258147.1	2.4e-122	233/484(48.14)	446	CDP-diacylglycerol--glycerol-3-phosphate 3-phosphatidyltransferase, mitochondrial [Athalia rosae]
TRINITY_DN14296_c0_g1_i1_8	XP_018015228.1	1.6e-110	190/251(75.70)	406	PREDICTED: neuroligin-4, Y-linked-like [Hyalella azteca]
TRINITY_DN14301_c0_g1_i1_2	XP_018023741.1	4.7e-57	98/195(50.26)	228	PREDICTED: ribonuclease Oy-like isoform X1 [Hyalella azteca]
TRINITY_DN14301_c0_g1_i1_5	XP_011254663.1	3.1e-34	85/224(37.95)	153	nicotinamide riboside kinase 1 [Camponotus floridanus]
TRINITY_DN14303_c0_g1_i1_1	XP_018011463.1	1.2e-40	100/239(41.84)	174	PREDICTED: cytochrome P450 302a1, mitochondrial-like [Hyalella azteca]
TRINITY_DN14303_c0_g1_i1_6	EEN55193.1	2.0e-22	84/297(28.28)	115	hypothetical protein BRAFLDRAFT_64464 [Branchiostoma floridae]
TRINITY_DN14304_c0_g1_i1_3	ACD13589.1	9.5e-144	263/295(89.15)	517	prohibitin 2 [Penaeus monodon]
TRINITY_DN14305_c0_g1_i1_3	XP_018008309.1	2.2e-80	154/222(69.37)	306	PREDICTED: NFU1 iron-sulfur cluster scaffold homolog, mitochondrial-like isoform X1 [Hyalella azteca]
TRINITY_DN14309_c0_g1_i2_6	XP_018010210.1	8.4e-110	201/363(55.37)	405	PREDICTED: serine/threonine-protein kinase Chk2-like [Hyalella azteca]
TRINITY_DN14311_c0_g1_i1_6	XP_018015971.1	9.1e-79	146/152(96.05)	302	PREDICTED: ubiquitin-conjugating enzyme E2 N [Hyalella azteca]
TRINITY_DN14313_c0_g1_i1_6	KXZ75711.1	2.1e-07	43/135(31.85)	63	hypothetical protein TcasGA2_TC031725 [Tribolium castaneum]
TRINITY_DN14313_c0_g2_i1_8	KOF73042.1	4.3e-23	58/90(64.44)	114	hypothetical protein OCBIM_22038491mg [Octopus bimaculoides]
TRINITY_DN14318_c0_g1_i1_6	XP_013386357.1	1.8e-301	489/766(63.84)	1042	intraflagellar transport protein 80 homolog isoform X2 [Lingula anatina]
TRINITY_DN14319_c0_g1_i2_5	XP_022788099.1	8.4e-08	31/48(64.58)	63	uncharacterized protein LOC111328018 [Stylophora pistillata]
TRINITY_DN14320_c0_g1_i1_6	AQM56004.1	2.1e-28	49/67(73.13)	133	chitinase-4 [Penaeus monodon]
TRINITY_DN14320_c0_g2_i1_6	AQM56004.1	9.9e-21	41/58(70.69)	107	chitinase-4 [Penaeus monodon]
TRINITY_DN14321_c0_g1_i1_4	PSN49985.1	2.4e-11	35/52(67.31)	78	Up-regulated during skeletal muscle growth protein 5 [Blattella germanica]
TRINITY_DN14324_c0_g1_i1_6	EKC21445.1	1.6e-18	96/411(23.36)	101	hypothetical protein CGI_10003874 [Crassostrea gigas]
TRINITY_DN1432_c0_g1_i1_8	XP_018024756.1	4.4e-12	50/102(49.02)	79	PREDICTED: uncharacterized protein LOC108680448 [Hyalella azteca]
TRINITY_DN14331_c0_g1_i1_6	XP_018016716.1	4.4e-57	144/421(34.20)	229	PREDICTED: transmembrane protein 62-like [Hyalella azteca]
TRINITY_DN14331_c0_g2_i1_6	XP_012233033.1	1.6e-06	29/64(45.31)	59	PREDICTED: transmembrane protein 62-like [Linepithema humile]
TRINITY_DN14332_c0_g1_i1_2	XP_021934555.1	2.6e-88	195/329(59.27)	333	nuclear migration protein nudC isoform X2 [Zootermopsis nevadensis]
TRINITY_DN14333_c0_g1_i1_3	XP_018007958.1	8.5e-31	66/133(49.62)	141	PREDICTED: bifunctional protein GlmU-like [Hyalella azteca]
TRINITY_DN14338_c0_g2_i1_3	EEC00327.1	1.0e-127	257/521(49.33)	464	FYVE finger-containing phosphoinositide kinase, fyv1, putative [Ixodes scapularis]
TRINITY_DN14338_c0_g3_i1_3	XP_022251658.1	6.3e-197	389/889(43.76)	695	1-phosphatidylinositol 3-phosphate 5-kinase-like, partial [Limulus polyphemus]
TRINITY_DN14340_c0_g1_i1_7	ACR54122.1	2.7e-20	50/64(78.12)	106	cuticle proprotein, partial [Palaemon varians]
TRINITY_DN14343_c0_g1_i2_5	KXJ24854.1	1.6e-31	59/116(50.86)	142	Uncharacterized protein K02A2.6 [Exaiptasia pallida]
TRINITY_DN14345_c0_g1_i1_1	XP_023944950.1	1.3e-19	40/66(60.61)	104	NADH dehydrogenase [ubiquinone] 1 beta subcomplex subunit 2, mitochondrial-like [Bicyclus anynana]
TRINITY_DN14347_c0_g1_i1_3	XP_021940407.1	4.5e-22	47/90(52.22)	111	amino acid transporter AVT1J [Zootermopsis nevadensis]
TRINITY_DN14347_c0_g1_i1_4	XP_020628490.1	1.1e-23	91/319(28.53)	118	plastidic glucose transporter 4-like [Orbicella faveolata]
TRINITY_DN14347_c1_g1_i1_3	XP_018017292.1	2.0e-27	67/131(51.15)	129	PREDICTED: amino acid transporter ANTL1-like [Hyalella azteca]
TRINITY_DN14349_c0_g1_i2_6	XP_018027669.1	5.0e-30	65/149(43.62)	138	PREDICTED: uncharacterized protein LOC108682923 [Hyalella azteca]
TRINITY_DN14349_c0_g2_i1_6	XP_018027669.1	1.0e-87	183/419(43.68)	332	PREDICTED: uncharacterized protein LOC108682923 [Hyalella azteca]
TRINITY_DN14350_c0_g1_i1_6	XP_024219290.1	3.6e-09	38/100(38.00)	68	uncharacterized protein LOC112211564 [Halyomorpha halys]
TRINITY_DN14353_c0_g1_i1_6	XP_018015688.1	2.2e-97	188/410(45.85)	364	PREDICTED: adipocyte plasma membrane-associated protein-like [Hyalella azteca]
TRINITY_DN14356_c0_g1_i1_6	EFX65057.1	2.3e-149	268/629(42.61)	537	ABC protein, subfamily ABCD [Daphnia pulex]
TRINITY_DN14362_c0_g1_i1_6	XP_018020915.1	9.3e-34	111/315(35.24)	151	PREDICTED: uncharacterized protein LOC108677230 [Hyalella azteca]
TRINITY_DN14364_c0_g1_i2_6	XP_011419096.1	6.2e-173	298/427(69.79)	614	PREDICTED: probable acyl-CoA dehydrogenase 6 [Crassostrea gigas]
TRINITY_DN14371_c0_g1_i1_5	XP_018013342.1	5.9e-71	127/197(64.47)	276	PREDICTED: uncharacterized oxidoreductase ZK1290.5-like isoform X1 [Hyalella azteca]
TRINITY_DN1437_c0_g1_i1_5	XP_018024236.1	6.1e-23	45/50(90.00)	114	PREDICTED: uncharacterized protein LOC108679998 [Hyalella azteca]
TRINITY_DN1437_c0_g1_i1_6	XP_013388573.1	4.3e-16	64/164(39.02)	93	uncharacterized protein LOC106157457 [Lingula anatina]
TRINITY_DN14381_c0_g2_i1_1	AQL41194.1	1.1e-61	108/189(57.14)	243	cytochrome P450 CYP2B [Eriocheir sinensis]
TRINITY_DN14382_c0_g1_i1_6	XP_018010221.1	2.8e-87	173/311(55.63)	330	PREDICTED: adenosine 3'-phospho 5'-phosphosulfate transporter 2-like isoform X2 [Hyalella azteca]
TRINITY_DN14384_c0_g3_i1_4	PRD36909.1	4.4e-126	207/482(42.95)	459	Svep1 [Nephila clavipes]
TRINITY_DN1438_c0_g1_i1_5	XP_018425159.1	6.1e-08	36/66(54.55)	64	PREDICTED: nucleolar protein 6 [Nanorana parkeri]
TRINITY_DN14390_c0_g1_i1_3	XP_018025051.1	3.6e-58	106/211(50.24)	232	PREDICTED: sulfotransferase 1A3-like [Hyalella azteca]
TRINITY_DN14390_c0_g1_i1_4	XP_018009219.1	5.2e-26	55/98(56.12)	125	PREDICTED: putative glycine-rich cell wall structural protein 1 [Hyalella azteca]
TRINITY_DN14390_c0_g1_i1_5	AFA42360.1	2.2e-62	108/194(55.67)	246	clip domain serine proteinase 2 [Portunus trituberculatus]
TRINITY_DN14390_c0_g2_i1_3	AJC52502.1	4.9e-16	48/114(42.11)	91	estrogen sulfotransferase [Scylla olivacea]
TRINITY_DN14394_c0_g1_i1_3	XP_018010325.1	5.1e-170	300/521(57.58)	605	PREDICTED: DNA polymerase epsilon subunit 2-like [Hyalella azteca]
TRINITY_DN14395_c0_g1_i2_7	XP_023328155.1	1.6e-76	154/321(47.98)	294	putative methyltransferase C9orf114 [Eurytemora affinis]
TRINITY_DN14399_c0_g1_i1_7	XP_025043475.1	2.9e-30	76/132(57.58)	140	LOW QUALITY PROTEIN: protein ZBED8-like [Pelodiscus sinensis]
TRINITY_DN1439_c0_g1_i1_6	XP_018009312.1	2.4e-41	74/90(82.22)	175	PREDICTED: uncharacterized protein LOC108666882 [Hyalella azteca]
TRINITY_DN14401_c0_g1_i1_4	XP_021941152.1	1.2e-19	155/615(25.20)	105	uncharacterized protein LOC110840421 isoform X1 [Zootermopsis nevadensis]
TRINITY_DN14417_c0_g2_i1_5	XP_021924763.1	2.3e-08	28/48(58.33)	66	helicase POLQ-like isoform X1 [Zootermopsis nevadensis]
TRINITY_DN14419_c0_g1_i1_5	ACR54112.1	3.1e-27	63/65(96.92)	129	ribosomal protein P1 [Palaemon varians]
TRINITY_DN14421_c0_g1_i1_1	XP_018022033.1	1.7e-79	196/536(36.57)	304	PREDICTED: uncharacterized protein LOC108678184 [Hyalella azteca]
TRINITY_DN14422_c0_g2_i1_3	PNF18256.1	0.0e+00	518/780(66.41)	1142	Bifunctional heparan sulfate N-deacetylase/N-sulfotransferase [Cryptotermes secundus]
TRINITY_DN14423_c0_g1_i1_2	XP_018026971.1	3.9e-129	307/789(38.91)	469	PREDICTED: conserved oligomeric Golgi complex subunit 2-like [Hyalella azteca]
TRINITY_DN14427_c0_g1_i1_6	XP_018023282.1	1.8e-56	243/445(54.61)	228	PREDICTED: uncharacterized protein LOC108679190 [Hyalella azteca]
TRINITY_DN14427_c0_g1_i1_8	XP_018011841.1	8.5e-187	325/434(74.88)	660	PREDICTED: LOW QUALITY PROTEIN: leukocyte tyrosine kinase receptor-like [Hyalella azteca]
TRINITY_DN14428_c0_g1_i1_6	XP_014665808.1	2.8e-96	234/673(34.77)	360	PREDICTED: aminopeptidase O-like isoform X4 [Priapulus caudatus]
TRINITY_DN14429_c0_g1_i1_3	XP_018013065.1	7.1e-27	67/179(37.43)	128	PREDICTED: probable serine hydrolase [Hyalella azteca]
TRINITY_DN14429_c0_g2_i1_3	KZS21731.1	3.7e-07	34/112(30.36)	62	Serine hydrolase [Daphnia magna]
TRINITY_DN14430_c0_g2_i1_6	XP_024216229.1	7.6e-54	110/232(47.41)	218	multidrug resistance-associated protein 1 isoform X4 [Halyomorpha halys]
TRINITY_DN14430_c0_g4_i1_6	XP_018908582.1	7.4e-06	28/78(35.90)	58	PREDICTED: multidrug resistance-associated protein 1-like isoform X1 [Bemisia tabaci]
TRINITY_DN14438_c0_g2_i1_6	XP_022185683.1	2.1e-21	70/188(37.23)	110	uncharacterized protein LOC111044771 [Nilaparvata lugens]
TRINITY_DN14439_c0_g1_i1_6	XP_023717986.1	1.2e-82	143/193(74.09)	315	rab-like protein 2A [Cryptotermes secundus]
TRINITY_DN1443_c0_g1_i1_8	XP_018009330.1	1.7e-23	53/123(43.09)	116	PREDICTED: chaoptin-like isoform X1 [Hyalella azteca]
TRINITY_DN14440_c0_g1_i1_3	KFM61834.1	8.1e-26	54/123(43.90)	124	RNA-directed DNA polymerase from mobile element jockey, partial [Stegodyphus mimosarum]
TRINITY_DN14440_c0_g1_i1_4	XP_001600139.2	2.1e-44	84/215(39.07)	187	PREDICTED: putative inorganic phosphate cotransporter [Nasonia vitripennis]
TRINITY_DN14442_c0_g1_i3_6	XP_023340838.1	8.8e-132	245/462(53.03)	478	thiamine transporter 1-like [Eurytemora affinis]
TRINITY_DN14447_c0_g1_i1_6	XP_023333914.1	2.1e-56	151/471(32.06)	228	uncharacterized protein LOC111705557 [Eurytemora affinis]
TRINITY_DN1444_c0_g1_i1_5	XP_023217565.1	4.9e-82	200/532(37.59)	313	uncharacterized protein LOC111619963 [Centruroides sculpturatus]
TRINITY_DN14450_c0_g1_i1_6	OWF40977.1	4.9e-19	91/349(26.07)	104	Importin subunit alpha-B [Mizuhopecten yessoensis]
TRINITY_DN14457_c0_g1_i1_6	XP_018022687.1	2.0e-91	191/344(55.52)	344	PREDICTED: 3-ketodihydrosphingosine reductase-like isoform X1 [Hyalella azteca]
TRINITY_DN14458_c0_g1_i1_6	EEC08369.1	6.4e-51	94/195(48.21)	209	CDK2- associated dual specificity phosphatase, putative [Ixodes scapularis]
TRINITY_DN1445_c0_g1_i1_5	XP_018014201.1	2.5e-24	55/117(47.01)	119	PREDICTED: roundabout homolog 1-like [Hyalella azteca]
TRINITY_DN14464_c0_g1_i1_5	XP_024944754.1	1.6e-17	48/122(39.34)	97	synaptotagmin-5 isoform X2 [Cephus cinctus]
TRINITY_DN14464_c0_g1_i2_2	XP_018023120.1	7.0e-36	68/120(56.67)	158	PREDICTED: uncharacterized protein LOC108679102 [Hyalella azteca]
TRINITY_DN14465_c0_g1_i1_4	XP_018026450.1	1.3e-24	75/235(31.91)	122	PREDICTED: uncharacterized protein LOC108681885 [Hyalella azteca]
TRINITY_DN14468_c0_g1_i1_5	XP_021355212.1	8.0e-07	21/64(32.81)	60	uncharacterized protein LOC110451492 [Mizuhopecten yessoensis]
TRINITY_DN1446_c0_g1_i1_6	XP_015517229.1	5.3e-20	53/92(57.61)	104	PREDICTED: zinc finger with UFM1-specific peptidase domain protein-like isoform X1 [Neodiprion lecontei]
TRINITY_DN14470_c0_g1_i1_6	XP_018009369.1	2.4e-07	27/54(50.00)	62	PREDICTED: tripartite motif-containing protein 65-like [Hyalella azteca]
TRINITY_DN14470_c0_g1_i1_7	XP_013772792.1	1.3e-126	317/1018(31.14)	462	ATP-binding cassette sub-family A member 1-like [Limulus polyphemus]
TRINITY_DN14471_c0_g1_i1_3	XP_023691255.1	2.7e-21	61/152(40.13)	109	uncharacterized protein K02A2.6-like [Paramormyrops kingsleyae]
TRINITY_DN14475_c0_g1_i1_3	EAA12399.4	5.1e-65	128/262(48.85)	255	AGAP008143-PA [Anopheles gambiae str. PEST]
TRINITY_DN14475_c0_g2_i1_3	XP_018009675.1	2.9e-46	95/268(35.45)	193	PREDICTED: beta,beta-carotene 15,15'-dioxygenase-like isoform X1 [Hyalella azteca]
TRINITY_DN14476_c0_g1_i1_4	ATW63863.1	1.6e-150	298/393(75.83)	540	protein serine threonine kinase [Penaeus vannamei]
TRINITY_DN14477_c0_g1_i1_6	PSN37677.1	1.7e-74	155/433(35.80)	288	hypothetical protein C0J52_05617 [Blattella germanica]
TRINITY_DN14477_c0_g1_i1_7	XP_011665969.1	2.3e-06	32/79(40.51)	59	PREDICTED: uncharacterized protein LOC105439090 [Strongylocentrotus purpuratus]
TRINITY_DN14477_c0_g2_i1_7	XP_019642992.1	9.3e-56	116/245(47.35)	224	PREDICTED: pteridine reductase 1-like [Branchiostoma belcheri]
TRINITY_DN14484_c0_g1_i1_4	ANA91285.1	0.0e+00	1637/1684(97.21)	3256	clathrin [Penaeus japonicus]
TRINITY_DN14486_c0_g1_i1_6	AGI50961.1	7.1e-195	354/354(100.00)	687	extra sex combs [Macrobrachium nipponense]
TRINITY_DN14489_c0_g1_i1_6	XP_015509678.1	1.3e-71	129/194(66.49)	277	PREDICTED: 39S ribosomal protein L11, mitochondrial [Neodiprion lecontei]
TRINITY_DN14492_c0_g1_i1_3	XP_022914094.1	3.4e-35	84/219(38.36)	156	uncharacterized protein LOC111424696 [Onthophagus taurus]
TRINITY_DN14494_c0_g1_i2_3	XP_018008740.1	3.4e-116	199/282(70.57)	426	PREDICTED: suppressor of fused homolog [Hyalella azteca]
TRINITY_DN14497_c0_g1_i1_6	KFB40633.1	8.5e-08	25/30(83.33)	64	AGAP001819-PA-like protein [Anopheles sinensis]
TRINITY_DN14500_c0_g1_i1_6	XP_018028238.1	8.0e-30	67/135(49.63)	138	PREDICTED: peroxidase-like [Hyalella azteca]
TRINITY_DN14504_c0_g1_i1_6	XP_018013850.1	1.7e-36	99/265(37.36)	160	PREDICTED: pecanex-like protein 4 [Hyalella azteca]
TRINITY_DN14504_c0_g3_i1_6	XP_018013850.1	1.8e-26	68/145(46.90)	126	PREDICTED: pecanex-like protein 4 [Hyalella azteca]
TRINITY_DN14505_c0_g1_i1_3	XP_018010272.1	8.0e-46	131/455(28.79)	192	PREDICTED: uncharacterized protein LOC108667725 [Hyalella azteca]
TRINITY_DN14505_c0_g2_i1_6	XP_018027258.1	5.1e-07	65/187(34.76)	63	PREDICTED: uncharacterized protein LOC108682578 [Hyalella azteca]
TRINITY_DN14509_c0_g1_i1_3	XP_006107965.1	1.2e-29	69/99(69.70)	137	tigger transposable element-derived protein 1-like, partial [Myotis lucifugus]
TRINITY_DN14511_c0_g1_i1_3	XP_018018588.1	6.5e-35	76/164(46.34)	154	PREDICTED: uncharacterized protein LOC108675114 [Hyalella azteca]
TRINITY_DN14515_c0_g1_i1_2	XP_025002368.1	1.1e-08	64/208(30.77)	69	cytoplasmic tyrosine-protein kinase BMX [Gallus gallus]
TRINITY_DN14515_c0_g1_i1_6	XP_018014459.1	3.2e-27	80/231(34.63)	130	PREDICTED: methyltransferase-like protein 24 isoform X2 [Hyalella azteca]
TRINITY_DN1451_c0_g2_i1_8	XP_021940791.1	5.1e-33	89/148(60.14)	148	ubiquitin carboxyl-terminal hydrolase 32 isoform X1 [Zootermopsis nevadensis]
TRINITY_DN14522_c0_g1_i1_2	XP_022830313.1	3.9e-17	47/106(44.34)	97	transmembrane protein 170A [Spodoptera litura]
TRINITY_DN14524_c0_g1_i1_3	KDR13429.1	2.2e-30	84/221(38.01)	142	Kelch repeat and BTB domain-containing protein 4 [Zootermopsis nevadensis]
TRINITY_DN14528_c0_g2_i1_6	XP_018020701.1	3.8e-47	89/188(47.34)	196	PREDICTED: alpha-N-acetylglucosaminidase-like [Hyalella azteca]
TRINITY_DN14531_c1_g2_i1_3	XP_012153574.1	1.2e-16	45/88(51.14)	93	PREDICTED: RNA-directed DNA polymerase from mobile element jockey-like, partial [Megachile rotundata]
TRINITY_DN14537_c0_g3_i1_4	BAK23962.1	1.3e-60	112/167(67.07)	240	ribulose-1,5-bisphosphate carboxylase/oxygenase small subunit [synthetic construct]
TRINITY_DN14539_c0_g1_i1_4	YP_004221771.1	2.8e-106	205/223(91.93)	392	cytochrome c oxidase subunit II [Macrobrachium nipponense]
TRINITY_DN14541_c0_g1_i1_6	XP_018010188.1	1.1e-41	95/234(40.60)	180	PREDICTED: uncharacterized protein LOC108667657 [Hyalella azteca]
TRINITY_DN14542_c0_g1_i1_6	XP_018017499.1	3.6e-131	228/349(65.33)	476	PREDICTED: serine/threonine-protein kinase Sgk1-like [Hyalella azteca]
TRINITY_DN1454_c0_g2_i1_5	XP_018006770.1	2.0e-18	39/52(75.00)	99	PREDICTED: longitudinals lacking protein, isoforms H/M/V-like isoform X10 [Hyalella azteca]
TRINITY_DN14550_c0_g1_i1_6	PIK61247.1	1.1e-36	105/322(32.61)	161	reverse transcriptase [Apostichopus japonicus]
TRINITY_DN14550_c1_g1_i1_6	PIK33470.1	2.6e-24	68/187(36.36)	120	putative TBC1 domain family member 2A [Apostichopus japonicus]
TRINITY_DN14551_c0_g1_i1_3	XP_021939037.1	8.1e-138	236/386(61.14)	499	TBC1 domain family member 13 isoform X1 [Zootermopsis nevadensis]
TRINITY_DN14558_c0_g1_i1_6	XP_018049052.1	2.5e-79	153/279(54.84)	303	PREDICTED: transcription initiation factor IIE subunit beta [Atta colombica]
TRINITY_DN14569_c0_g1_i2_1	XP_018019743.1	7.5e-14	40/57(70.18)	84	PREDICTED: uncharacterized protein LOC108676198 [Hyalella azteca]
TRINITY_DN14570_c0_g1_i1_6	AYC12380.1	4.4e-304	511/553(92.41)	1051	activin receptor type-2A [Palaemon carinicauda]
TRINITY_DN14576_c0_g1_i2_6	XP_023716239.1	6.3e-31	74/207(35.75)	142	pleckstrin homology domain-containing family A member 8 isoform X1 [Cryptotermes secundus]
TRINITY_DN14579_c0_g1_i2_6	XP_018015243.1	5.0e-160	328/535(61.31)	572	PREDICTED: ecto-NOX disulfide-thiol exchanger 2-like [Hyalella azteca]
TRINITY_DN14580_c0_g2_i1_3	XP_018024321.1	2.3e-90	161/205(78.54)	340	PREDICTED: uncharacterized protein LOC108680075 [Hyalella azteca]
TRINITY_DN14581_c0_g1_i1_5	XP_023190232.1	2.1e-14	46/104(44.23)	85	uncharacterized protein LOC111608691 [Xiphophorus maculatus]
TRINITY_DN14586_c0_g1_i1_5	XP_021938042.1	1.3e-37	70/131(53.44)	163	UPF0545 protein C22orf39 homolog [Zootermopsis nevadensis]
TRINITY_DN14589_c0_g1_i1_3	XP_023720735.1	1.3e-54	206/775(26.58)	222	transforming growth factor beta receptor type 3-like [Cryptotermes secundus]
TRINITY_DN14590_c0_g1_i1_8	PFX31927.1	1.0e-23	73/189(38.62)	118	hypothetical protein AWC38_SpisGene3248 [Stylophora pistillata]
TRINITY_DN14592_c0_g1_i1_3	XP_018006758.1	3.4e-09	30/52(57.69)	69	PREDICTED: zinc finger protein 236-like [Hyalella azteca]
TRINITY_DN14597_c0_g1_i1_7	XP_018008485.1	1.3e-193	341/437(78.03)	683	PREDICTED: eukaryotic translation initiation factor 3 subunit E-B-like isoform X2 [Hyalella azteca]
TRINITY_DN14598_c0_g1_i2_2	AUH28159.1	8.8e-40	81/82(98.78)	171	reactive oxygen species modulator 1 [Penaeus vannamei]
TRINITY_DN14603_c0_g1_i1_6	XP_021957886.1	2.7e-89	276/652(42.33)	337	RNA-binding protein 28-like [Folsomia candida]
TRINITY_DN14606_c0_g4_i1_6	XP_018019422.1	2.2e-32	83/178(46.63)	146	PREDICTED: protein spire-like [Hyalella azteca]
TRINITY_DN14608_c0_g1_i2_4	XP_022294702.1	5.2e-123	235/542(43.36)	449	cytochrome b5 reductase 4-like isoform X4 [Crassostrea virginica]
TRINITY_DN14612_c0_g1_i1_3	XP_018016437.1	2.1e-81	172/335(51.34)	310	PREDICTED: cystinosin homolog [Hyalella azteca]
TRINITY_DN14612_c0_g1_i1_5	XP_018013585.1	2.2e-19	55/158(34.81)	103	PREDICTED: uncharacterized protein LOC108670626 [Hyalella azteca]
TRINITY_DN14612_c0_g1_i1_6	XP_015512793.1	4.9e-68	127/252(50.40)	265	PREDICTED: monocyte to macrophage differentiation factor [Neodiprion lecontei]
TRINITY_DN14612_c0_g1_i1_8	XP_021709262.1	9.3e-106	179/266(67.29)	391	phosphatidylinositol transfer protein alpha isoform isoform X2 [Aedes aegypti]
TRINITY_DN14613_c0_g1_i1_1	XP_022197228.1	2.8e-54	107/119(89.92)	221	protein yippee-like 5 [Nilaparvata lugens]
TRINITY_DN14613_c0_g1_i2_6	XP_014298550.1	3.2e-46	94/178(52.81)	192	PREDICTED: trans-1,2-dihydrobenzene-1,2-diol dehydrogenase [Microplitis demolitor]
TRINITY_DN14613_c0_g2_i1_6	ODM97442.1	8.0e-37	82/191(42.93)	161	Trans-1,2-dihydrobenzene-1,2-diol dehydrogenase [Orchesella cincta]
TRINITY_DN14615_c0_g1_i1_3	XP_021355212.1	2.1e-09	75/301(24.92)	70	uncharacterized protein LOC110451492 [Mizuhopecten yessoensis]
TRINITY_DN14615_c0_g1_i1_6	XP_018019624.1	2.8e-70	126/159(79.25)	272	PREDICTED: NACHT and WD repeat domain-containing protein 2-like [Hyalella azteca]
TRINITY_DN14615_c0_g1_i2_8	XP_018006947.1	7.6e-99	206/263(78.33)	367	PREDICTED: band 7 protein AGAP004871-like [Hyalella azteca]
TRINITY_DN14617_c0_g1_i1_7	XP_018018434.1	6.7e-32	104/292(35.62)	146	PREDICTED: uncharacterized protein LOC108674959 [Hyalella azteca]
TRINITY_DN14621_c0_g1_i1_1	AFJ11392.1	1.9e-56	106/199(53.27)	226	hematopoietic prostaglandin D synthase [Penaeus monodon]
TRINITY_DN14622_c0_g1_i1_4	XP_018018714.1	2.4e-31	66/115(57.39)	144	PREDICTED: uncharacterized protein LOC108675230 [Hyalella azteca]
TRINITY_DN14624_c0_g1_i1_4	XP_017779266.1	5.2e-61	115/178(64.61)	243	PREDICTED: signal peptidase complex subunit 3 [Nicrophorus vespilloides]
TRINITY_DN14625_c0_g1_i1_8	XP_019578504.1	2.9e-58	100/136(73.53)	231	PREDICTED: expansin-A4 [Rhinolophus sinicus]
TRINITY_DN14626_c0_g1_i1_6	XP_018027011.1	5.4e-50	96/158(60.76)	205	PREDICTED: uncharacterized protein LOC108682369 [Hyalella azteca]
TRINITY_DN14630_c0_g1_i2_3	XP_018014568.1	9.5e-22	82/254(32.28)	111	PREDICTED: glutamate receptor ionotropic, delta-1-like [Hyalella azteca]
TRINITY_DN14631_c0_g1_i2_1	EFX71338.1	5.5e-32	76/97(78.35)	145	hypothetical protein DAPPUDRAFT_227979 [Daphnia pulex]
TRINITY_DN14634_c0_g1_i1_6	EGD83143.1	1.2e-39	75/141(53.19)	170	hypothetical protein PTSG_12079 [Salpingoeca rosetta]
TRINITY_DN14639_c1_g1_i1_3	XP_007434210.1	1.2e-47	85/122(69.67)	196	histone-lysine N-methyltransferase SETD2 isoform X2 [Python bivittatus]
TRINITY_DN14642_c0_g1_i2_5	XP_018026837.1	1.5e-81	154/242(63.64)	310	PREDICTED: viral IAP-associated factor homolog [Hyalella azteca]
TRINITY_DN14644_c0_g1_i1_6	XP_001186509.2	7.6e-14	38/89(42.70)	84	PREDICTED: uncharacterized protein LOC754648 [Strongylocentrotus purpuratus]
TRINITY_DN14644_c0_g2_i1_3	XP_018018224.1	2.6e-37	90/272(33.09)	164	PREDICTED: protein O-linked-mannose beta-1,2-N-acetylglucosaminyltransferase 1-like [Hyalella azteca]
TRINITY_DN14645_c0_g1_i1_4	XP_018011006.1	7.5e-21	79/211(37.44)	110	PREDICTED: serine-rich adhesin for platelets-like [Hyalella azteca]
TRINITY_DN14646_c1_g2_i1_3	BAK23962.1	2.3e-95	171/175(97.71)	356	ribulose-1,5-bisphosphate carboxylase/oxygenase small subunit [synthetic construct]
TRINITY_DN14648_c0_g1_i1_3	CRK88030.1	3.5e-12	40/79(50.63)	78	CLUMA_CG001816, isoform A [Clunio marinus]
TRINITY_DN14648_c0_g2_i1_3	XP_024937561.1	3.9e-22	65/153(42.48)	112	RYamide receptor isoform X2 [Cephus cinctus]
TRINITY_DN1464_c0_g1_i1_6	XP_009016415.1	1.1e-37	71/93(76.34)	163	hypothetical protein HELRODRAFT_171453 [Helobdella robusta]
TRINITY_DN14650_c0_g1_i1_6	RLQ74729.1	4.5e-17	66/152(43.42)	95	TCF24 [Cricetulus griseus]
TRINITY_DN14653_c0_g1_i1_7	XP_020438905.1	1.4e-54	101/147(68.71)	219	glycine dehydrogenase [Heterostelium album PN500]
TRINITY_DN14658_c0_g1_i2_4	XP_021963292.1	4.3e-148	261/468(55.77)	532	succinate-semialdehyde dehydrogenase, mitochondrial-like [Folsomia candida]
TRINITY_DN14659_c0_g1_i1_5	XP_018016089.1	2.8e-34	70/110(63.64)	154	PREDICTED: uncharacterized protein LOC108672849 [Hyalella azteca]
TRINITY_DN14665_c2_g1_i1_6	XP_018015467.1	3.3e-18	67/194(34.54)	99	PREDICTED: uncharacterized protein LOC108672335, partial [Hyalella azteca]
TRINITY_DN14671_c0_g1_i1_5	XP_019769338.1	2.7e-25	82/239(34.31)	123	PREDICTED: uncharacterized protein LOC109543862 [Dendroctonus ponderosae]
TRINITY_DN14671_c0_g1_i1_6	AWV55760.1	7.7e-07	51/219(23.29)	62	cysteinyl aspartate specific proteinase 3 [Eriocheir sinensis]
TRINITY_DN14671_c0_g1_i2_8	XP_018012524.1	1.7e-13	35/72(48.61)	84	PREDICTED: protein tramtrack, beta isoform-like isoform X11 [Hyalella azteca]
TRINITY_DN14678_c0_g2_i1_6	XP_014254647.1	5.5e-13	41/104(39.42)	82	proton-coupled folate transporter-like [Cimex lectularius]
TRINITY_DN14681_c0_g1_i1_6	AKS48286.1	3.4e-41	93/202(46.04)	176	gamma-interferon induced thiol reductase GILT3 [Scylla paramamosain]
TRINITY_DN14683_c0_g1_i1_1	AUX81356.1	1.2e-37	80/102(78.43)	164	heat shock protein 10 [Penaeus vannamei]
TRINITY_DN14686_c0_g1_i1_3	AWU67089.1	3.9e-93	165/266(62.03)	349	putative trypsin, partial [Crangon crangon]
TRINITY_DN14687_c0_g1_i1_4	XP_018927171.1	3.3e-24	67/163(41.10)	119	PREDICTED: endogenous retrovirus group K member 25 Pol protein-like [Cyprinus carpio]
TRINITY_DN14689_c0_g1_i1_6	XP_018024046.1	1.6e-14	40/46(86.96)	87	PREDICTED: 4-hydroxybutyrate coenzyme A transferase-like [Hyalella azteca]
TRINITY_DN14690_c0_g1_i1_6	XP_018494100.1	4.8e-13	61/227(26.87)	83	PREDICTED: agrin-like [Galendromus occidentalis]
TRINITY_DN14693_c0_g1_i1_3	XP_023705368.1	3.0e-96	181/332(54.52)	359	KRR1 small subunit processome component homolog [Cryptotermes secundus]
TRINITY_DN14693_c0_g1_i1_5	XP_013776466.1	2.8e-169	354/714(49.58)	603	LOW QUALITY PROTEIN: protein SDA1 homolog [Limulus polyphemus]
TRINITY_DN14695_c0_g1_i1_6	XP_018017376.1	1.7e-111	208/336(61.90)	410	PREDICTED: amino acid transporter ANT1-like [Hyalella azteca]
TRINITY_DN14696_c0_g1_i1_6	XP_018018515.1	2.1e-73	160/234(68.38)	284	PREDICTED: serum response factor homolog [Hyalella azteca]
TRINITY_DN14697_c0_g1_i1_2	XP_018017767.1	4.7e-158	280/327(85.63)	565	PREDICTED: succinyl-CoA ligase subunit alpha, mitochondrial-like [Hyalella azteca]
TRINITY_DN14704_c0_g1_i3_1	AKI88007.1	0.0e+00	862/1084(79.52)	1664	apoptosis signal-regulating kinase 1 [Penaeus vannamei]
TRINITY_DN14708_c0_g1_i1_5	PIK51299.1	2.1e-85	173/394(43.91)	323	hypothetical protein BSL78_11819 [Apostichopus japonicus]
TRINITY_DN1470_c0_g1_i1_7	PSN49838.1	2.2e-35	98/219(44.75)	157	hypothetical protein C0J52_08845, partial [Blattella germanica]
TRINITY_DN14711_c0_g1_i1_4	AQT18916.1	2.1e-42	89/127(70.08)	180	chitin-binding protein [Macrobrachium nipponense]
TRINITY_DN14713_c0_g1_i1_7	XP_023726077.1	1.0e-119	371/752(49.34)	438	ralBP1-associated Eps domain-containing protein 1 isoform X2 [Cryptotermes secundus]
TRINITY_DN14714_c0_g1_i1_5	XP_018009104.1	2.2e-82	159/292(54.45)	313	PREDICTED: probable cytochrome P450 49a1 [Hyalella azteca]
TRINITY_DN14715_c0_g1_i1_4	XP_018011902.1	7.2e-218	797/1223(65.17)	765	PREDICTED: chaoptin-like [Hyalella azteca]
TRINITY_DN14721_c0_g1_i1_6	XP_016403946.1	1.7e-06	25/52(48.08)	59	PREDICTED: excitatory amino acid transporter 5-like [Sinocyclocheilus rhinocerous]
TRINITY_DN14724_c0_g1_i1_7	XP_001604505.1	1.3e-125	233/346(67.34)	457	PREDICTED: methylthioribose-1-phosphate isomerase [Nasonia vitripennis]
TRINITY_DN14735_c0_g1_i1_3	XP_018020789.1	5.2e-67	282/604(46.69)	264	PREDICTED: transcriptional coactivator YAP1-like isoform X2 [Hyalella azteca]
TRINITY_DN14737_c0_g2_i1_6	PSN30904.1	1.4e-41	123/279(44.09)	177	hypothetical protein C0J52_18573 [Blattella germanica]
TRINITY_DN14737_c0_g3_i1_6	PNF15516.1	2.2e-32	82/163(50.31)	146	hypothetical protein B7P43_G17012 [Cryptotermes secundus]
TRINITY_DN14739_c0_g1_i1_6	XP_018011970.1	1.7e-109	216/378(57.14)	404	PREDICTED: cystinosin homolog isoform X1 [Hyalella azteca]
TRINITY_DN14745_c0_g1_i1_3	XP_021350369.1	2.4e-13	65/184(35.33)	84	uncharacterized protein LOC110448443 [Mizuhopecten yessoensis]
TRINITY_DN14746_c0_g1_i4_5	XP_018011788.1	1.0e-17	54/154(35.06)	99	PREDICTED: uncharacterized protein LOC108669014 [Hyalella azteca]
TRINITY_DN14747_c0_g1_i1_6	XP_011605880.1	1.2e-108	225/440(51.14)	401	PREDICTED: DNA-binding protein SMUBP-2 [Takifugu rubripes]
TRINITY_DN14752_c0_g2_i1_8	XP_006631101.1	2.4e-16	79/271(29.15)	93	PREDICTED: EF-hand and coiled-coil domain-containing protein 1 [Lepisosteus oculatus]
TRINITY_DN14755_c0_g1_i1_3	XP_015127862.1	1.6e-32	73/109(66.97)	148	PREDICTED: bolA-like protein DDB_G0274169 [Diachasma alloeum]
TRINITY_DN14756_c0_g1_i1_3	XP_018025277.1	1.2e-20	51/104(49.04)	106	PREDICTED: Down syndrome cell adhesion molecule-like protein Dscam2 [Hyalella azteca]
TRINITY_DN14756_c0_g2_i1_3	XP_018025277.1	2.8e-19	51/112(45.54)	102	PREDICTED: Down syndrome cell adhesion molecule-like protein Dscam2 [Hyalella azteca]
TRINITY_DN14756_c0_g3_i1_3	XP_021922498.1	6.0e-28	62/150(41.33)	131	Down syndrome cell adhesion molecule-like protein Dscam2 isoform X3 [Zootermopsis nevadensis]
TRINITY_DN14758_c0_g1_i1_4	XP_017301933.2	3.2e-24	60/132(45.45)	119	piezo-type mechanosensitive ion channel component 1-like [Diaphorina citri]
TRINITY_DN14758_c0_g3_i1_4	XP_015835788.1	2.0e-25	65/154(42.21)	124	PREDICTED: piezo-type mechanosensitive ion channel component isoform X5 [Tribolium castaneum]
TRINITY_DN14763_c0_g1_i1_8	EFX79202.1	8.4e-10	34/43(79.07)	72	virilizer-like protein [Daphnia pulex]
TRINITY_DN14767_c0_g1_i1_3	XP_018024139.1	4.1e-46	103/273(37.73)	192	PREDICTED: UDP-glucuronosyltransferase-like isoform X3 [Hyalella azteca]
TRINITY_DN14767_c0_g1_i1_5	AEB40304.1	1.4e-14	39/55(70.91)	86	mitochondrial ATP synthase epsilon subunit precursor [Penaeus vannamei]
TRINITY_DN14767_c0_g2_i1_3	XP_018024140.1	4.9e-71	118/231(51.08)	275	PREDICTED: UDP-glucuronosyltransferase-like isoform X4 [Hyalella azteca]
TRINITY_DN1476_c0_g1_i1_6	PIK51902.1	5.0e-26	60/100(60.00)	124	hypothetical protein BSL78_11201 [Apostichopus japonicus]
TRINITY_DN14772_c0_g2_i1_6	XP_018020087.1	6.6e-20	65/189(34.39)	105	PREDICTED: uncharacterized protein LOC108676516 [Hyalella azteca]
TRINITY_DN14773_c0_g2_i1_6	XP_021938792.1	2.2e-281	506/836(60.53)	975	LOW QUALITY PROTEIN: WD repeat and FYVE domain-containing protein 3-like [Zootermopsis nevadensis]
TRINITY_DN14774_c0_g1_i1_1	XP_018027580.1	1.2e-115	189/268(70.52)	425	PREDICTED: beta-1,4-N-acetylgalactosaminyltransferase bre-4-like isoform X1 [Hyalella azteca]
TRINITY_DN14775_c0_g1_i1_3	XP_023015458.1	9.7e-38	67/98(68.37)	164	uncharacterized protein LOC111504967 [Leptinotarsa decemlineata]
TRINITY_DN14775_c0_g1_i1_6	XP_018011706.1	1.8e-162	368/871(42.25)	580	PREDICTED: serine/threonine-protein kinase fused-like [Hyalella azteca]
TRINITY_DN14779_c0_g1_i1_4	XP_011704943.1	7.4e-38	71/138(51.45)	165	PREDICTED: putative defense protein 3 [Wasmannia auropunctata]
TRINITY_DN1477_c0_g1_i1_6	ASK05861.1	2.7e-27	68/113(60.18)	129	chitin-binding protein [Macrobrachium nipponense]
TRINITY_DN14784_c0_g1_i1_6	KXJ22390.1	1.1e-33	108/336(32.14)	152	putative transposase-like protein HI-1328.1 [Exaiptasia pallida]
TRINITY_DN14785_c0_g1_i1_2	XP_012172871.1	7.2e-85	161/311(51.77)	323	uncharacterized protein YJR142W [Bombus terrestris]
TRINITY_DN14785_c0_g1_i1_8	XP_018790045.1	2.0e-19	64/154(41.56)	103	PREDICTED: uncharacterized protein LOC108969645 [Bactrocera latifrons]
TRINITY_DN14785_c0_g2_i1_6	XP_018021514.1	7.0e-124	216/354(61.02)	451	PREDICTED: heparan sulfate 2-O-sulfotransferase 1-like [Hyalella azteca]
TRINITY_DN14786_c0_g1_i1_4	AUB30152.1	5.8e-192	323/375(86.13)	677	fast-type skeletal muscle actin 7 [Penaeus vannamei]
TRINITY_DN14786_c0_g1_i1_6	XP_015925496.1	4.8e-80	132/263(50.19)	305	out at first protein-like [Parasteatoda tepidariorum]
TRINITY_DN14788_c0_g1_i1_8	XP_006872928.1	6.5e-06	30/71(42.25)	58	PREDICTED: LOW QUALITY PROTEIN: SCAN domain-containing protein 3 [Chrysochloris asiatica]
TRINITY_DN14790_c0_g1_i1_6	XP_022339060.1	4.7e-15	52/145(35.86)	89	zinc finger protein 236-like [Crassostrea virginica]
TRINITY_DN14791_c0_g1_i1_6	EEN61037.1	3.7e-25	85/255(33.33)	122	hypothetical protein BRAFLDRAFT_85168 [Branchiostoma floridae]
TRINITY_DN14794_c0_g1_i1_2	XP_021919236.1	7.6e-90	172/388(44.33)	339	protein AAR2 homolog isoform X2 [Zootermopsis nevadensis]
TRINITY_DN14796_c0_g1_i1_3	XP_018022490.1	6.7e-26	58/98(59.18)	125	PREDICTED: Down syndrome cell adhesion molecule-like protein Dscam2 [Hyalella azteca]
TRINITY_DN14797_c0_g1_i1_3	XP_021933163.1	2.1e-70	188/452(41.59)	274	HMG domain-containing protein 4 isoform X2 [Zootermopsis nevadensis]
TRINITY_DN14798_c0_g1_i1_6	XP_019939659.1	6.5e-130	269/592(45.44)	472	PREDICTED: DNA polymerase lambda [Paralichthys olivaceus]
TRINITY_DN14799_c0_g1_i1_5	XP_018019263.1	2.3e-72	136/258(52.71)	281	PREDICTED: josephin-1-like [Hyalella azteca]
TRINITY_DN14802_c0_g1_i1_5	XP_018015502.1	1.7e-22	79/187(42.25)	114	PREDICTED: uncharacterized protein LOC108672369 [Hyalella azteca]
TRINITY_DN14807_c0_g1_i1_3	XP_018022704.1	4.3e-95	195/356(54.78)	355	PREDICTED: uncharacterized protein LOC108678750 [Hyalella azteca]
TRINITY_DN14811_c0_g1_i1_5	XP_009917077.1	5.3e-79	146/157(92.99)	301	PREDICTED: elongation factor 1-alpha 1, partial [Haliaeetus albicilla]
TRINITY_DN14815_c0_g1_i1_5	PIK61247.1	1.5e-19	55/119(46.22)	103	reverse transcriptase [Apostichopus japonicus]
TRINITY_DN1481_c0_g1_i2_1	AFJ11398.1	2.5e-103	198/384(51.56)	383	thromboxane A synthase [Penaeus monodon]
TRINITY_DN14821_c0_g1_i1_6	XP_018016688.1	1.2e-111	214/273(78.39)	411	PREDICTED: tRNA selenocysteine 1-associated protein 1-like [Hyalella azteca]
TRINITY_DN14824_c0_g1_i1_4	BAH02823.1	3.9e-75	161/428(37.62)	290	duplex-specific nuclease [Paralithodes camtschaticus]
TRINITY_DN14828_c0_g1_i1_1	XP_017767858.1	1.7e-41	82/110(74.55)	176	PREDICTED: COX assembly mitochondrial protein homolog [Nicrophorus vespilloides]
TRINITY_DN14836_c0_g1_i1_3	XP_005406112.1	7.4e-27	74/153(48.37)	128	PREDICTED: tigger transposable element-derived protein 1-like isoform X3 [Chinchilla lanigera]
TRINITY_DN14838_c0_g1_i1_8	ACH85309.1	3.9e-39	103/327(31.50)	170	transposase-like [Salmo salar]
TRINITY_DN14844_c0_g1_i1_3	XP_023216422.1	2.0e-62	114/209(54.55)	246	meiotic nuclear division protein 1 homolog isoform X1 [Centruroides sculpturatus]
TRINITY_DN14850_c0_g1_i1_3	AET34914.1	1.4e-143	246/378(65.08)	517	prophenoloxide activating enzyme III [Macrobrachium rosenbergii]
TRINITY_DN14853_c0_g1_i1_2	XP_013794821.1	3.1e-112	183/392(46.68)	413	acid ceramidase-like [Limulus polyphemus]
TRINITY_DN14853_c0_g1_i1_4	XP_018024391.1	3.7e-06	37/95(38.95)	58	PREDICTED: uncharacterized protein LOC108680131 [Hyalella azteca]
TRINITY_DN14853_c0_g1_i1_5	XP_021355212.1	2.6e-10	32/84(38.10)	72	uncharacterized protein LOC110451492 [Mizuhopecten yessoensis]
TRINITY_DN14854_c0_g1_i1_5	XP_018026008.1	1.3e-18	49/62(79.03)	100	PREDICTED: ADP-ribosylation factor-like protein 4C [Hyalella azteca]
TRINITY_DN14857_c0_g2_i1_6	AWM95782.1	2.2e-281	506/621(81.48)	975	type 1 phosphodiesterase [Penaeus vannamei]
TRINITY_DN14857_c0_g2_i2_3	OCA41423.1	4.4e-12	36/69(52.17)	80	hypothetical protein XENTR_v90008489mg [Xenopus tropicalis]
TRINITY_DN14866_c0_g1_i1_3	XP_015597830.1	1.3e-35	95/291(32.65)	158	lactosylceramide 4-alpha-galactosyltransferase isoform X1 [Cephus cinctus]
TRINITY_DN14868_c0_g1_i1_1	ABG67960.1	8.0e-62	116/226(51.33)	244	prophenoloxidase activating enzyme III [Callinectes sapidus]
TRINITY_DN14876_c0_g2_i1_6	XP_018018658.1	1.0e-13	56/173(32.37)	84	PREDICTED: uncharacterized protein LOC108675177 [Hyalella azteca]
TRINITY_DN14879_c0_g1_i1_6	ELU00496.1	8.1e-36	79/146(54.11)	158	hypothetical protein CAPTEDRAFT_91714 [Capitella teleta]
TRINITY_DN14879_c0_g2_i1_6	XP_014667414.1	4.4e-33	108/476(22.69)	150	PREDICTED: protein FAM179B-like [Priapulus caudatus]
TRINITY_DN14880_c0_g1_i1_7	ELU11276.1	2.2e-134	242/462(52.38)	486	hypothetical protein CAPTEDRAFT_178973 [Capitella teleta]
TRINITY_DN14885_c0_g1_i1_6	XP_018022368.1	6.6e-06	33/114(28.95)	60	PREDICTED: AT-rich interactive domain-containing protein 2-like isoform X2 [Hyalella azteca]
TRINITY_DN14895_c0_g1_i4_5	XP_018026481.1	1.5e-81	149/199(74.87)	311	PREDICTED: RNA-binding protein lark-like [Hyalella azteca]
TRINITY_DN14897_c0_g1_i1_6	XP_018012099.1	3.3e-27	58/118(49.15)	131	PREDICTED: uncharacterized protein LOC108669304 [Hyalella azteca]
TRINITY_DN14897_c0_g1_i1_8	XP_018013942.1	2.2e-110	226/580(38.97)	407	PREDICTED: transient receptor potential cation channel subfamily A member 1-like [Hyalella azteca]
TRINITY_DN14901_c0_g1_i1_6	XP_018014830.1	2.4e-162	267/384(69.53)	579	PREDICTED: ethanolaminephosphotransferase 1-like [Hyalella azteca]
TRINITY_DN14904_c0_g3_i1_5	PSN48761.1	1.2e-207	433/1094(39.58)	731	hypothetical protein C0J52_05184 [Blattella germanica]
TRINITY_DN14904_c0_g4_i1_5	XP_018917180.1	5.3e-44	97/261(37.16)	185	PREDICTED: lysosomal-trafficking regulator [Bemisia tabaci]
TRINITY_DN14905_c0_g2_i1_6	XP_008547042.1	3.7e-22	52/110(47.27)	113	PREDICTED: uncharacterized protein LOC103570920 [Microplitis demolitor]
TRINITY_DN14908_c0_g1_i1_6	XP_021379630.1	4.8e-22	55/144(38.19)	112	uncharacterized protein LOC110467064 [Mizuhopecten yessoensis]
TRINITY_DN14913_c0_g2_i1_6	XP_020904392.1	1.1e-12	45/106(42.45)	80	uncharacterized protein LOC110242720 [Exaiptasia pallida]
TRINITY_DN14914_c0_g1_i1_6	ACR54142.1	2.5e-41	83/83(100.00)	176	ribosomal protein rps21 [Palaemon varians]
TRINITY_DN14914_c0_g2_i1_6	ACR54142.1	2.8e-17	43/44(97.73)	95	ribosomal protein rps21 [Palaemon varians]
TRINITY_DN14915_c0_g4_i1_2	ANA91274.1	1.6e-39	79/120(65.83)	169	dual oxidase [Penaeus japonicus]
TRINITY_DN14917_c1_g1_i1_6	XP_022202283.1	3.5e-07	61/229(26.64)	64	leucine-rich repeat-containing protein 28-like [Nilaparvata lugens]
TRINITY_DN14935_c0_g1_i1_6	XP_018006360.1	6.1e-131	341/954(35.74)	476	PREDICTED: protein FAM160B1-like [Hyalella azteca]
TRINITY_DN14936_c0_g1_i1_6	XP_023705570.1	1.1e-26	57/105(54.29)	126	protein ALP1-like [Cryptotermes secundus]
TRINITY_DN14936_c0_g2_i1_6	XP_023311325.1	3.3e-43	81/129(62.79)	181	protein ANTAGONIST OF LIKE HETEROCHROMATIN PROTEIN 1-like [Anoplophora glabripennis]
TRINITY_DN14942_c0_g1_i2_6	PNF34141.1	1.3e-108	215/477(45.07)	401	hypothetical protein B7P43_G01151 [Cryptotermes secundus]
TRINITY_DN14943_c0_g1_i1_7	XP_023662844.1	6.1e-11	45/124(36.29)	75	uncharacterized protein LOC111841374, partial [Paramormyrops kingsleyae]
TRINITY_DN14944_c0_g1_i1_7	AAT49637.1	2.3e-09	40/126(31.75)	71	PA2706, partial [synthetic construct]
TRINITY_DN14944_c0_g1_i2_5	XP_018019494.1	3.3e-49	92/162(56.79)	202	PREDICTED: calcium and integrin-binding family member 3-like [Hyalella azteca]
TRINITY_DN14944_c0_g3_i1_6	EFX83785.1	2.1e-14	41/69(59.42)	85	hypothetical protein DAPPUDRAFT_315546 [Daphnia pulex]
TRINITY_DN14945_c0_g2_i1_6	XP_022108803.1	1.0e-63	120/174(68.97)	250	N-sulphoglucosamine sulphohydrolase-like isoform X2 [Acanthaster planci]
TRINITY_DN14945_c0_g3_i1_6	XP_005989162.1	3.3e-16	42/77(54.55)	92	PREDICTED: N-sulphoglucosamine sulphohydrolase [Latimeria chalumnae]
TRINITY_DN14948_c0_g1_i1_6	XP_018015705.1	7.0e-147	257/315(81.59)	528	PREDICTED: putative tricarboxylate transport protein, mitochondrial [Hyalella azteca]
TRINITY_DN14950_c0_g1_i1_5	XP_018009808.1	1.7e-191	332/534(62.17)	677	PREDICTED: extracellular serine/threonine protein CG31145-like [Hyalella azteca]
TRINITY_DN14951_c0_g1_i1_6	XP_019619724.1	4.3e-249	408/654(62.39)	868	PREDICTED: acetoacetyl-CoA synthetase-like [Branchiostoma belcheri]
TRINITY_DN14954_c0_g3_i1_6	XP_018014896.1	2.9e-98	182/296(61.49)	367	PREDICTED: solute carrier family 25 member 51-like [Hyalella azteca]
TRINITY_DN1495_c0_g1_i1_3	ESO99567.1	1.5e-11	37/87(42.53)	77	hypothetical protein LOTGIDRAFT_173709 [Lottia gigantea]
TRINITY_DN14960_c0_g1_i1_6	XP_018012684.1	3.0e-11	38/89(42.70)	75	PREDICTED: uncharacterized protein LOC108669786 [Hyalella azteca]
TRINITY_DN14961_c0_g1_i1_6	XP_018021993.1	5.9e-164	302/558(54.12)	585	PREDICTED: uncharacterized protein LOC108678155 [Hyalella azteca]
TRINITY_DN14962_c0_g1_i1_5	XP_014222990.1	5.1e-33	98/307(31.92)	149	RNA exonuclease 1 homolog [Trichogramma pretiosum]
TRINITY_DN14964_c0_g1_i1_6	XP_023677321.1	1.3e-48	109/320(34.06)	201	uncharacterized protein LOC111849037 [Paramormyrops kingsleyae]
TRINITY_DN14964_c0_g1_i1_8	XP_018024106.1	7.5e-34	69/117(58.97)	150	PREDICTED: nephrin-like isoform X2 [Hyalella azteca]
TRINITY_DN14967_c0_g1_i1_6	XP_018020987.1	3.0e-56	141/223(63.23)	226	PREDICTED: charged multivesicular body protein 4b-like [Hyalella azteca]
TRINITY_DN14968_c0_g4_i1_6	XP_018008496.1	3.1e-72	125/196(63.78)	279	PREDICTED: alpha-1,6-mannosyl-glycoprotein 2-beta-N-acetylglucosaminyltransferase-like [Hyalella azteca]
TRINITY_DN14969_c0_g1_i1_4	XP_013388573.1	8.0e-12	34/73(46.58)	78	uncharacterized protein LOC106157457 [Lingula anatina]
TRINITY_DN14971_c0_g1_i4_6	XP_018013905.1	1.7e-07	27/41(65.85)	63	PREDICTED: teneurin-a-like [Hyalella azteca]
TRINITY_DN14975_c0_g1_i1_7	XP_018010659.1	1.8e-25	64/128(50.00)	124	PREDICTED: mediator of RNA polymerase II transcription subunit 29-like [Hyalella azteca]
TRINITY_DN14975_c0_g1_i2_6	XP_018027484.1	6.6e-29	64/124(51.61)	135	PREDICTED: DNA-directed RNA polymerases I and III subunit RPAC2-like [Hyalella azteca]
TRINITY_DN14977_c0_g1_i1_6	XP_018020138.1	8.9e-23	71/142(50.00)	115	PREDICTED: uncharacterized protein LOC108676562 [Hyalella azteca]
TRINITY_DN14979_c0_g1_i1_2	XP_018024092.1	4.2e-14	57/164(34.76)	87	PREDICTED: BTB/POZ domain-containing protein 6-like [Hyalella azteca]
TRINITY_DN14989_c0_g1_i1_4	XP_023716802.1	8.3e-71	134/180(74.44)	276	protein tyrosine phosphatase type IVA 1 [Cryptotermes secundus]
TRINITY_DN14991_c0_g1_i1_5	XP_018026450.1	8.7e-14	45/124(36.29)	84	PREDICTED: uncharacterized protein LOC108681885 [Hyalella azteca]
TRINITY_DN14991_c0_g2_i1_5	XP_021374147.1	1.1e-06	27/77(35.06)	60	tripartite motif-containing protein 45-like isoform X1 [Mizuhopecten yessoensis]
TRINITY_DN14993_c0_g2_i1_5	KFM64962.1	9.0e-07	27/55(49.09)	60	putative RNA-directed DNA polymerase from transposon X-element, partial [Stegodyphus mimosarum]
TRINITY_DN14994_c0_g1_i3_6	KZC09421.1	2.7e-90	178/311(57.23)	340	ADP-ribosylation factor GTPase-activating protein 1 [Dufourea novaeangliae]
TRINITY_DN14996_c1_g1_i1_7	XP_018015851.1	2.9e-20	47/62(75.81)	106	PREDICTED: vitamin D3 receptor B-like [Hyalella azteca]
TRINITY_DN14_c0_g1_i1_3	OWF35295.1	3.9e-22	59/141(41.84)	112	Wiskott-Aldrich syndrome protein [Mizuhopecten yessoensis]
TRINITY_DN15003_c0_g1_i1_7	XP_026820079.1	6.7e-49	102/272(37.50)	201	hemicentin-1-like [Rhopalosiphum maidis]
TRINITY_DN15003_c0_g2_i1_7	XP_018019989.1	2.2e-23	65/119(54.62)	117	PREDICTED: contactin-6-like, partial [Hyalella azteca]
TRINITY_DN15004_c0_g1_i1_3	XP_018009737.1	3.7e-151	263/394(66.75)	542	PREDICTED: PCI domain-containing protein 2-like [Hyalella azteca]
TRINITY_DN15009_c0_g1_i1_3	EFX67457.1	9.5e-60	113/254(44.49)	238	hypothetical protein DAPPUDRAFT_302008 [Daphnia pulex]
TRINITY_DN1500_c0_g1_i1_5	AFV39705.1	2.6e-117	233/311(74.92)	429	Bmal1a [Pacifastacus leniusculus]
TRINITY_DN15014_c0_g1_i1_7	XP_013775908.1	2.8e-59	115/249(46.18)	236	39S ribosomal protein L46, mitochondrial-like [Limulus polyphemus]
TRINITY_DN15015_c0_g1_i1_5	XP_002409180.1	1.2e-10	41/118(34.75)	74	conserved hypothetical protein [Ixodes scapularis]
TRINITY_DN15016_c1_g1_i1_7	XP_018027078.1	6.3e-24	48/77(62.34)	117	PREDICTED: CUB domain-containing protein 2-like isoform X1 [Hyalella azteca]
TRINITY_DN15016_c1_g2_i1_7	XP_018027080.1	1.9e-59	105/221(47.51)	236	PREDICTED: cubilin-like isoform X2 [Hyalella azteca]
TRINITY_DN15017_c0_g1_i1_4	XP_018014312.1	3.5e-92	207/515(40.19)	346	PREDICTED: uncharacterized protein LOC108671308 [Hyalella azteca]
TRINITY_DN15021_c0_g1_i1_6	XP_018010489.1	3.2e-19	58/113(51.33)	105	PREDICTED: uncharacterized protein LOC108667899 [Hyalella azteca]
TRINITY_DN15022_c0_g1_i1_6	XP_014676826.1	4.5e-19	51/129(39.53)	101	PREDICTED: uncharacterized protein K02A2.6-like [Priapulus caudatus]
TRINITY_DN15022_c0_g2_i1_6	XP_018920739.1	9.6e-37	80/139(57.55)	160	PREDICTED: uncharacterized protein K02A2.6-like [Cyprinus carpio]
TRINITY_DN15023_c0_g1_i2_6	XP_018024237.1	5.2e-73	128/258(49.61)	282	PREDICTED: heparan sulfate 2-O-sulfotransferase pipe-like [Hyalella azteca]
TRINITY_DN15025_c0_g1_i2_3	AXF35707.1	5.4e-147	377/599(62.94)	530	CWO [Homarus americanus]
TRINITY_DN15029_c0_g1_i2_6	AKK23338.1	9.4e-168	271/362(74.86)	597	knickkopf [Cherax quadricarinatus]
TRINITY_DN15029_c0_g2_i1_3	AWU67226.1	5.3e-110	199/322(61.80)	405	putative cathepsin L [Crangon crangon]
TRINITY_DN15032_c0_g1_i1_8	XP_025760805.1	6.7e-17	86/301(28.57)	96	LOW QUALITY PROTEIN: uncharacterized protein LOC109203514 [Oreochromis niloticus]
TRINITY_DN15032_c0_g2_i1_2	XP_025416794.1	1.2e-08	38/97(39.18)	66	uncharacterized protein LOC112688000 [Sipha flava]
TRINITY_DN15034_c0_g1_i1_4	XP_015521220.1	1.3e-96	189/327(57.80)	361	PREDICTED: U4/U6 small nuclear ribonucleoprotein Prp4 [Neodiprion lecontei]
TRINITY_DN15034_c0_g1_i1_8	XP_022256499.1	4.4e-84	361/837(43.13)	320	fibulin-1-like, partial [Limulus polyphemus]
TRINITY_DN15036_c0_g1_i1_7	KZS15090.1	1.5e-72	129/174(74.14)	280	1,2-dihydroxy-3-keto-5-methylthiopentene dioxygenase [Daphnia magna]
TRINITY_DN15036_c0_g2_i1_5	XP_015914952.1	2.2e-09	42/105(40.00)	69	uncharacterized protein LOC107445127 [Parasteatoda tepidariorum]
TRINITY_DN15037_c0_g1_i1_6	XP_018018767.1	6.7e-23	52/80(65.00)	115	PREDICTED: Golgi SNAP receptor complex member 2-like [Hyalella azteca]
TRINITY_DN15038_c0_g1_i1_3	PIK38800.1	1.2e-10	52/141(36.88)	73	hypothetical protein BSL78_24355 [Apostichopus japonicus]
TRINITY_DN15040_c0_g1_i2_6	XP_025198865.1	2.9e-33	70/133(52.63)	149	zinc finger MYM-type protein 1-like [Melanaphis sacchari]
TRINITY_DN15044_c0_g2_i1_4	KFM73934.1	7.8e-07	29/35(82.86)	60	Mannose-1-phosphate guanyltransferase alpha-B, partial [Stegodyphus mimosarum]
TRINITY_DN15045_c0_g1_i1_3	KZS20766.1	1.3e-103	192/211(91.00)	384	Ras-related protein Rab-8A [Daphnia magna]
TRINITY_DN1504_c0_g1_i1_3	AFW04306.1	1.7e-51	100/120(83.33)	209	anti-lipopolysaccharide factor 3 [Macrobrachium rosenbergii]
TRINITY_DN15051_c0_g1_i1_6	XP_018016914.1	2.0e-124	300/709(42.31)	454	PREDICTED: condensin-2 complex subunit H2-like isoform X1 [Hyalella azteca]
TRINITY_DN15054_c0_g1_i1_4	AKU77070.1	5.8e-07	36/80(45.00)	62	acetylcholinesterase 1, partial [Cherax quadricarinatus]
TRINITY_DN15054_c0_g2_i1_4	ABX44668.1	5.8e-220	348/523(66.54)	771	acetylcholinesterase, partial [Alphitobius diaperinus]
TRINITY_DN15056_c0_g1_i1_2	XP_026490922.1	1.6e-70	154/340(45.29)	274	ribosome biogenesis regulatory protein homolog [Vanessa tameamea]
TRINITY_DN15058_c0_g1_i2_6	ANH79230.1	7.3e-28	62/91(68.13)	132	VLIG1 [Macrobrachium rosenbergii]
TRINITY_DN15060_c0_g1_i1_6	XP_024084669.1	2.0e-15	40/108(37.04)	89	4-coumarate--CoA ligase 3-like isoform X2 [Cimex lectularius]
TRINITY_DN15060_c0_g2_i1_6	ALK82308.1	1.2e-113	210/408(51.47)	417	acyl-CoA synthetase [Macrobrachium nipponense]
TRINITY_DN15063_c0_g3_i1_6	XP_021350369.1	8.2e-11	45/110(40.91)	73	uncharacterized protein LOC110448443 [Mizuhopecten yessoensis]
TRINITY_DN15065_c0_g1_i1_5	XP_015835823.1	4.5e-52	123/357(34.45)	213	PREDICTED: ribonuclease P protein subunit p40-like isoform X2 [Tribolium castaneum]
TRINITY_DN15067_c0_g1_i1_6	XP_023210409.1	4.0e-19	65/144(45.14)	102	uncharacterized protein LOC111613293, partial [Centruroides sculpturatus]
TRINITY_DN15067_c1_g1_i1_5	KXZ75618.1	5.6e-21	58/151(38.41)	108	Gag-Pol polyprotein-like Protein [Tribolium castaneum]
TRINITY_DN1506_c0_g1_i1_2	AFX93743.1	6.1e-06	25/36(69.44)	58	ferritin 1 [Ruditapes decussatus]
TRINITY_DN1506_c0_g1_i2_7	XP_018022991.1	1.0e-59	121/149(81.21)	237	PREDICTED: LOW QUALITY PROTEIN: transducin-like enhancer protein 4 [Hyalella azteca]
TRINITY_DN15074_c0_g1_i1_6	XP_023715766.1	2.4e-58	123/308(39.94)	234	transmembrane protein 177 [Cryptotermes secundus]
TRINITY_DN15079_c0_g1_i1_3	XP_018013295.1	1.3e-188	370/920(40.22)	667	PREDICTED: uncharacterized protein LOC108670342 [Hyalella azteca]
TRINITY_DN15081_c0_g1_i1_3	XP_018011684.1	1.9e-28	96/238(40.34)	134	PREDICTED: zinc finger protein 540-like [Hyalella azteca]
TRINITY_DN15089_c0_g1_i1_6	XP_018026744.1	8.0e-85	153/272(56.25)	321	PREDICTED: myosin-IIIb-like [Hyalella azteca]
TRINITY_DN1508_c0_g2_i1_5	XP_015518404.1	2.8e-09	44/71(61.97)	69	PREDICTED: uncharacterized protein LOC107223285 [Neodiprion lecontei]
TRINITY_DN15090_c0_g1_i2_3	XP_018014298.1	9.4e-97	195/420(46.43)	362	PREDICTED: equilibrative nucleoside transporter 3-like [Hyalella azteca]
TRINITY_DN15091_c0_g2_i1_3	OXU18782.1	4.3e-10	33/93(35.48)	72	hypothetical protein TSAR_005381, partial [Trichomalopsis sarcophagae]
TRINITY_DN15092_c0_g1_i1_2	XP_008180330.1	5.5e-13	40/90(44.44)	82	PREDICTED: uncharacterized protein LOC103308551 [Acyrthosiphon pisum]
TRINITY_DN15092_c0_g1_i1_8	KMY93022.1	4.0e-59	144/479(30.06)	236	uncharacterized protein Dsimw501_GD10807, isoform B [Drosophila simulans]
TRINITY_DN15092_c0_g2_i4_3	AGZ95685.1	4.5e-112	187/257(72.76)	413	C-type lectin 1 [Palaemon modestus]
TRINITY_DN15095_c0_g1_i1_5	XP_021929185.1	3.5e-110	236/418(56.46)	407	LOW QUALITY PROTEIN: histone-lysine N-methyltransferase 2D [Zootermopsis nevadensis]
TRINITY_DN15096_c0_g1_i4_3	XP_018009767.1	3.9e-54	100/147(68.03)	219	PREDICTED: cofilin/actin-depolymerizing factor homolog [Hyalella azteca]
TRINITY_DN15097_c0_g1_i1_3	XP_018020647.1	1.2e-52	108/308(35.06)	214	PREDICTED: probable cytochrome P450 49a1 [Hyalella azteca]
TRINITY_DN15097_c0_g1_i4_4	XP_018012119.1	1.0e-114	228/464(49.14)	421	PREDICTED: proton-coupled folate transporter-like [Hyalella azteca]
TRINITY_DN15099_c0_g1_i1_3	BAC82590.1	5.3e-46	140/401(34.91)	194	reverse transcriptase [Ciona intestinalis]
TRINITY_DN15102_c0_g1_i1_7	XP_023703834.1	1.8e-51	170/341(49.85)	211	protein FAM76A [Cryptotermes secundus]
TRINITY_DN15103_c0_g1_i2_3	ESP02890.1	8.2e-92	225/504(44.64)	345	hypothetical protein LOTGIDRAFT_156843 [Lottia gigantea]
TRINITY_DN15104_c0_g1_i1_6	XP_019640695.1	1.2e-75	153/307(49.84)	291	PREDICTED: factor VIII intron 22 protein-like [Branchiostoma belcheri]
TRINITY_DN15105_c0_g1_i1_4	XP_018017683.1	1.6e-38	124/269(46.10)	167	PREDICTED: uncharacterized protein LOC108674257 [Hyalella azteca]
TRINITY_DN15106_c0_g1_i1_6	XP_018024607.1	1.0e-77	136/229(59.39)	297	PREDICTED: ufm1-specific protease 1-like [Hyalella azteca]
TRINITY_DN15108_c0_g1_i1_6	XP_018025315.1	1.0e-126	218/287(75.96)	461	PREDICTED: mitochondrial import receptor subunit TOM40 homolog 1-like [Hyalella azteca]
TRINITY_DN15109_c0_g1_i1_6	RMX55762.1	2.6e-18	67/201(33.33)	99	hypothetical protein pdam_00025981, partial [Pocillopora damicornis]
TRINITY_DN15110_c0_g1_i1_3	XP_018018899.1	2.8e-37	73/102(71.57)	163	PREDICTED: peptidyl-prolyl cis-trans isomerase A2-like isoform X1 [Hyalella azteca]
TRINITY_DN15113_c0_g1_i1_5	XP_018006541.1	0.0e+00	858/1936(44.32)	1455	PREDICTED: nuclear pore complex protein Nup205-like [Hyalella azteca]
TRINITY_DN15115_c0_g2_i1_7	ACO12292.1	9.8e-25	59/148(39.86)	121	Cell adhesion molecule 3 precursor [Lepeophtheirus salmonis]
TRINITY_DN15118_c0_g1_i1_3	ALK82310.1	8.8e-185	340/340(100.00)	654	malate dehydrogenase [Macrobrachium nipponense]
TRINITY_DN15119_c0_g1_i1_5	PIO14721.1	5.0e-07	44/113(38.94)	63	hypothetical protein AB205_0097700, partial [Rana catesbeiana]
TRINITY_DN1511_c0_g1_i1_5	XP_018017232.1	2.6e-35	118/319(36.99)	157	PREDICTED: uncharacterized protein LOC108673864 [Hyalella azteca]
TRINITY_DN15121_c0_g1_i1_5	XP_015178043.1	6.6e-110	199/254(78.35)	404	PREDICTED: proteasome subunit alpha type-4 [Polistes dominula]
TRINITY_DN15122_c0_g1_i3_3	XP_018026450.1	1.4e-13	47/148(31.76)	85	PREDICTED: uncharacterized protein LOC108681885 [Hyalella azteca]
TRINITY_DN15128_c0_g1_i1_5	XP_021919731.1	3.4e-146	327/494(66.19)	526	LOW QUALITY PROTEIN: kelch-like protein diablo [Zootermopsis nevadensis]
TRINITY_DN15130_c0_g1_i1_3	APO14323.1	1.9e-116	210/211(99.53)	427	Sex-lethal 3 [Macrobrachium rosenbergii]
TRINITY_DN15147_c0_g1_i1_6	XP_014776346.1	9.7e-31	70/128(54.69)	140	PREDICTED: sulfate transporter-like isoform X2 [Octopus bimaculoides]
TRINITY_DN15147_c0_g1_i1_8	XP_014245166.1	9.0e-74	154/301(51.16)	285	translation initiation factor eIF-2B subunit alpha isoform X1 [Cimex lectularius]
TRINITY_DN15164_c0_g2_i1_7	KZS13155.1	3.2e-09	66/222(29.73)	70	Uncharacterized protein APZ42_021776 [Daphnia magna]
TRINITY_DN15165_c0_g1_i1_3	XP_018009077.1	1.9e-31	68/130(52.31)	143	PREDICTED: uncharacterized protein LOC108666671 [Hyalella azteca]
TRINITY_DN15166_c0_g1_i1_1	ODM93343.1	1.1e-12	40/128(31.25)	81	Organic cation transporter protein [Orchesella cincta]
TRINITY_DN15167_c0_g1_i1_1	KDR18203.1	1.7e-101	207/517(40.04)	377	Putative methyltransferase NSUN4 [Zootermopsis nevadensis]
TRINITY_DN15170_c0_g1_i1_6	XP_023312753.1	2.0e-24	64/151(42.38)	120	putative nuclease HARBI1 [Anoplophora glabripennis]
TRINITY_DN15175_c0_g1_i1_6	ATN38697.1	3.9e-25	60/105(57.14)	123	cuticle-like protein [Macrobrachium nipponense]
TRINITY_DN15179_c0_g3_i1_3	XP_023724415.1	7.8e-58	129/286(45.10)	231	brefeldin A-inhibited guanine nucleotide-exchange protein 3 [Cryptotermes secundus]
TRINITY_DN15183_c0_g2_i1_4	XP_025083263.1	7.9e-12	46/134(34.33)	79	low-density lipoprotein receptor-related protein 4-like isoform X2 [Pomacea canaliculata]
TRINITY_DN15191_c0_g2_i1_3	XP_020291479.1	2.3e-18	53/170(31.18)	99	uncharacterized protein LOC109858531 [Pseudomyrmex gracilis]
TRINITY_DN15196_c0_g1_i1_2	PFX27537.1	3.9e-25	58/125(46.40)	122	TNF receptor-associated factor 4 [Stylophora pistillata]
TRINITY_DN15197_c0_g1_i1_6	PSN34496.1	5.9e-112	200/331(60.42)	412	tRNA pseudouridine synthase A [Blattella germanica]
TRINITY_DN15199_c0_g1_i1_4	XP_025420898.1	1.6e-36	84/189(44.44)	160	general transcription factor II-I repeat domain-containing protein 2-like [Sipha flava]
TRINITY_DN15199_c0_g2_i1_4	XP_019203897.1	6.0e-98	183/344(53.20)	365	general transcription factor II-I repeat domain-containing protein 2-like [Oreochromis niloticus]
TRINITY_DN15203_c0_g1_i1_3	XP_013997658.1	1.1e-49	95/164(57.93)	203	PREDICTED: uncharacterized protein LOC106570150 [Salmo salar]
TRINITY_DN15203_c0_g1_i1_6	XP_023190232.1	1.3e-25	55/106(51.89)	123	uncharacterized protein LOC111608691 [Xiphophorus maculatus]
TRINITY_DN15205_c0_g2_i1_3	AGW23861.1	1.6e-48	94/143(65.73)	200	calmodulin, partial [Procambarus clarkii]
TRINITY_DN15208_c0_g1_i2_7	XP_001863960.1	9.2e-82	148/202(73.27)	311	mitochondrial 28S ribosomal protein S2 [Culex quinquefasciatus]
TRINITY_DN15212_c0_g1_i1_4	XP_015598570.1	7.8e-28	70/111(63.06)	133	protein CASC3 isoform X1 [Cephus cinctus]
TRINITY_DN15218_c0_g1_i1_6	PIK41669.1	4.3e-15	41/54(75.93)	89	hypothetical protein BSL78_21474 [Apostichopus japonicus]
TRINITY_DN15220_c0_g2_i1_8	XP_018007783.1	8.7e-60	152/369(41.19)	238	PREDICTED: neuroligin-1-like [Hyalella azteca]
TRINITY_DN15221_c0_g1_i1_5	XP_018009310.1	2.1e-41	113/412(27.43)	177	PREDICTED: uncharacterized protein LOC108666881 [Hyalella azteca]
TRINITY_DN15221_c0_g1_i1_7	ALF45199.1	4.1e-30	60/138(43.48)	139	CTLDcp3 [Macrobrachium nipponense]
TRINITY_DN15222_c1_g1_i1_6	XP_018008690.1	1.4e-19	58/131(44.27)	104	PREDICTED: uncharacterized protein DDB_G0287625-like [Hyalella azteca]
TRINITY_DN15224_c0_g1_i3_2	XP_018020423.1	8.7e-93	234/612(38.24)	349	PREDICTED: uncharacterized protein LOC108676797 [Hyalella azteca]
TRINITY_DN15225_c0_g1_i1_3	PIK34738.1	7.8e-32	80/199(40.20)	145	hypothetical protein BSL78_28434 [Apostichopus japonicus]
TRINITY_DN15225_c0_g1_i1_4	XP_018022797.1	2.9e-213	422/717(58.86)	749	PREDICTED: kinesin-like calmodulin-binding protein homolog isoform X4 [Hyalella azteca]
TRINITY_DN15225_c0_g1_i1_8	XP_018022434.1	2.4e-06	53/170(31.18)	60	PREDICTED: uncharacterized protein LOC108678499 [Hyalella azteca]
TRINITY_DN15225_c0_g2_i1_8	XP_018022434.1	1.3e-17	47/96(48.96)	97	PREDICTED: uncharacterized protein LOC108678499 [Hyalella azteca]
TRINITY_DN15226_c0_g1_i1_3	ENN70935.1	6.3e-09	42/123(34.15)	68	hypothetical protein YQE_12337, partial [Dendroctonus ponderosae]
TRINITY_DN15226_c0_g1_i1_5	XP_013785645.1	2.7e-130	243/372(65.32)	473	nucleoporin SEH1-like isoform X1 [Limulus polyphemus]
TRINITY_DN15237_c0_g1_i1_3	XP_016656071.1	4.5e-22	48/85(56.47)	112	PREDICTED: uncharacterized protein LOC107882349 [Acyrthosiphon pisum]
TRINITY_DN15238_c0_g2_i1_2	XP_018017827.1	5.9e-32	68/129(52.71)	147	PREDICTED: uncharacterized protein LOC108674399 isoform X2 [Hyalella azteca]
TRINITY_DN15239_c0_g1_i1_3	XP_020896492.1	1.5e-21	60/159(37.74)	110	SET and MYND domain-containing protein 4-like [Exaiptasia pallida]
TRINITY_DN1523_c0_g1_i1_2	XP_014386190.1	9.3e-34	97/242(40.08)	151	PREDICTED: zinc finger protein 530-like [Myotis brandtii]
TRINITY_DN15244_c0_g2_i1_4	XP_018009310.1	4.5e-44	105/307(34.20)	186	PREDICTED: uncharacterized protein LOC108666881 [Hyalella azteca]
TRINITY_DN15245_c0_g1_i1_3	ADK27312.1	7.6e-22	53/144(36.81)	111	C-type lectin [Procambarus clarkii]
TRINITY_DN15245_c0_g1_i1_6	PSN35233.1	1.5e-17	108/323(33.44)	97	hypothetical protein C0J52_15516 [Blattella germanica]
TRINITY_DN15246_c0_g1_i1_8	XP_017779536.1	2.9e-61	121/256(47.27)	243	PREDICTED: alkaline ceramidase isoform X1 [Nicrophorus vespilloides]
TRINITY_DN15247_c0_g1_i1_2	AEI88069.1	2.2e-11	30/43(69.77)	75	polyprotein-like protein, partial [Scylla paramamosain]
TRINITY_DN15250_c0_g1_i1_6	XP_017283958.1	1.1e-21	48/73(65.75)	110	prostasin-like [Kryptolebias marmoratus]
TRINITY_DN15250_c0_g1_i2_4	XP_018011187.1	6.4e-161	267/447(59.73)	575	PREDICTED: alpha-1,3-mannosyl-glycoprotein 2-beta-N-acetylglucosaminyltransferase-like [Hyalella azteca]
TRINITY_DN15252_c0_g1_i1_2	KZS09184.1	1.2e-57	108/197(54.82)	231	Brother of CDO [Daphnia magna]
TRINITY_DN15253_c0_g2_i1_3	XP_014670056.1	6.8e-06	27/60(45.00)	58	PREDICTED: uncharacterized protein LOC106811049 [Priapulus caudatus]
TRINITY_DN15255_c0_g1_i1_3	XP_018016657.1	2.1e-106	193/356(54.21)	394	PREDICTED: glycerol-3-phosphate acyltransferase 3-like [Hyalella azteca]
TRINITY_DN15257_c0_g1_i2_6	XP_006627641.1	1.1e-22	86/294(29.25)	115	PREDICTED: elongator complex protein 5 isoform X1 [Lepisosteus oculatus]
TRINITY_DN15260_c0_g1_i3_2	XP_023725626.1	4.2e-108	208/278(74.82)	400	another transcription unit protein isoform X1 [Cryptotermes secundus]
TRINITY_DN15262_c1_g1_i1_6	XP_018022907.1	1.8e-70	146/258(56.59)	273	PREDICTED: metalloprotease TIKI2-like [Hyalella azteca]
TRINITY_DN15262_c1_g1_i1_7	AEA51117.1	1.8e-07	29/49(59.18)	63	endonuclease-reverse transcriptase HmRTE-e01, partial [Oryzias melastigma]
TRINITY_DN15265_c0_g1_i1_8	AVD68961.1	2.4e-131	216/232(93.10)	476	obstructor B [Macrobrachium rosenbergii]
TRINITY_DN15273_c0_g1_i1_5	CFW94242.1	3.2e-279	553/1297(42.64)	969	Eka-PIP kinase protein [Euperipatoides kanangrensis]
TRINITY_DN15276_c0_g1_i1_5	XP_018021677.1	3.9e-127	222/324(68.52)	462	PREDICTED: eukaryotic translation initiation factor 3 subunit H-like [Hyalella azteca]
TRINITY_DN15276_c0_g1_i1_6	XP_018006820.1	4.5e-98	220/356(61.80)	366	PREDICTED: protein diaphanous-like, partial [Hyalella azteca]
TRINITY_DN15281_c0_g1_i1_5	XP_015600633.1	9.9e-116	195/313(62.30)	424	4-hydroxybenzoate polyprenyltransferase, mitochondrial isoform X1 [Cephus cinctus]
TRINITY_DN15287_c0_g1_i1_4	AQT18916.1	3.3e-38	80/126(63.49)	165	chitin-binding protein [Macrobrachium nipponense]
TRINITY_DN15287_c0_g1_i1_6	XP_022330020.1	2.1e-38	71/152(46.71)	166	N-chimaerin-like isoform X1 [Crassostrea virginica]
TRINITY_DN15287_c0_g2_i1_6	XP_015786362.1	1.7e-24	55/90(61.11)	119	N-chimaerin [Tetranychus urticae]
TRINITY_DN15291_c0_g1_i1_3	XP_023312337.1	1.1e-24	59/115(51.30)	120	uncharacterized protein LOC111692524 [Anoplophora glabripennis]
TRINITY_DN15291_c0_g1_i1_6	XP_021350369.1	2.4e-14	60/160(37.50)	86	uncharacterized protein LOC110448443 [Mizuhopecten yessoensis]
TRINITY_DN15291_c0_g2_i1_3	XP_012153574.1	2.1e-24	58/116(50.00)	119	PREDICTED: RNA-directed DNA polymerase from mobile element jockey-like, partial [Megachile rotundata]
TRINITY_DN15291_c0_g2_i1_6	XP_021363608.1	5.0e-12	49/147(33.33)	78	uncharacterized protein LOC110456894 [Mizuhopecten yessoensis]
TRINITY_DN15293_c0_g1_i2_6	XP_001962964.2	7.2e-35	89/202(44.06)	155	uncharacterized protein Dana_GF14169 [Drosophila ananassae]
TRINITY_DN15302_c0_g1_i1_3	XP_025104048.1	7.4e-112	197/325(60.62)	411	retinol dehydrogenase 13-like [Pomacea canaliculata]
TRINITY_DN15304_c0_g1_i1_7	XP_018017221.1	1.5e-29	77/246(31.30)	138	PREDICTED: uncharacterized protein LOC108673855 [Hyalella azteca]
TRINITY_DN15307_c0_g1_i1_2	XP_017785689.1	2.2e-35	103/243(42.39)	157	PREDICTED: testican-3 isoform X2 [Nicrophorus vespilloides]
TRINITY_DN15307_c0_g1_i1_6	XP_018020545.1	1.2e-68	152/405(37.53)	268	PREDICTED: T-lymphoma invasion and metastasis-inducing protein 2-like [Hyalella azteca]
TRINITY_DN15310_c0_g1_i1_6	XP_003436974.1	6.2e-16	43/78(55.13)	92	AGAP013476-PA [Anopheles gambiae str. PEST]
TRINITY_DN15315_c0_g1_i1_4	XP_023706550.1	3.2e-12	50/130(38.46)	81	protein C19orf12 homolog isoform X1 [Cryptotermes secundus]
TRINITY_DN15318_c0_g1_i1_3	AKK23338.1	2.1e-206	332/432(76.85)	725	knickkopf [Cherax quadricarinatus]
TRINITY_DN15318_c0_g1_i1_7	ADF87937.1	6.7e-60	103/110(93.64)	238	RING finger protein [Eriocheir sinensis]
TRINITY_DN15318_c0_g1_i1_8	XP_023717326.1	6.1e-228	405/678(59.73)	798	uncharacterized protein LOC111869790 isoform X1 [Cryptotermes secundus]
TRINITY_DN15319_c0_g1_i1_5	XP_015762645.1	1.5e-29	67/145(46.21)	136	PREDICTED: uncharacterized protein LOC107341697 [Acropora digitifera]
TRINITY_DN15319_c0_g1_i3_6	AHJ25685.1	5.5e-41	82/87(94.25)	174	acyl-CoA-binding protein [Macrobrachium nipponense]
TRINITY_DN15321_c0_g2_i1_4	XP_018015753.1	4.8e-06	35/113(30.97)	58	PREDICTED: solute carrier family 22 member 16-like, partial [Hyalella azteca]
TRINITY_DN15324_c0_g2_i1_4	XP_013780770.2	6.2e-29	80/145(55.17)	135	phospholipid-transporting ATPase IA-like, partial [Limulus polyphemus]
TRINITY_DN15329_c0_g1_i1_4	XP_018016395.1	1.9e-104	208/504(41.27)	387	PREDICTED: uncharacterized protein LOC108673120 [Hyalella azteca]
TRINITY_DN15331_c0_g1_i1_5	XP_018006872.1	2.2e-57	130/242(53.72)	230	PREDICTED: neither inactivation nor afterpotential protein C-like isoform X2 [Hyalella azteca]
TRINITY_DN15335_c0_g1_i1_8	KFD60298.1	3.2e-15	47/98(47.96)	88	hypothetical protein M514_27517 [Trichuris suis]
TRINITY_DN1533_c0_g1_i1_5	XP_018014826.1	2.6e-129	279/717(38.91)	470	PREDICTED: myotubularin-related protein 10-A-like [Hyalella azteca]
TRINITY_DN15342_c0_g1_i6_6	XP_018026481.1	1.5e-81	149/199(74.87)	311	PREDICTED: RNA-binding protein lark-like [Hyalella azteca]
TRINITY_DN15343_c0_g1_i1_6	XP_018016838.1	1.0e-42	89/147(60.54)	181	PREDICTED: actin-related protein 8-like [Hyalella azteca]
TRINITY_DN15345_c0_g1_i2_7	AYC12386.1	2.4e-250	439/570(77.02)	872	transforming growth factor beta receptor type-1 [Palaemon carinicauda]
TRINITY_DN1534_c0_g1_i1_2	XP_018024107.1	1.2e-126	231/426(54.23)	460	PREDICTED: nephrin-like isoform X3 [Hyalella azteca]
TRINITY_DN15357_c0_g1_i1_3	KXJ09478.1	5.3e-27	57/137(41.61)	129	Craniofacial development protein 2, partial [Exaiptasia pallida]
TRINITY_DN15359_c0_g1_i1_7	AVD96947.1	4.0e-64	126/256(49.22)	252	cadherin-like protein-6, partial [Nilaparvata lugens]
TRINITY_DN1535_c0_g1_i1_3	KRT83889.1	3.0e-24	54/93(58.06)	119	hypothetical protein AMK59_4164 [Oryctes borbonicus]
TRINITY_DN15361_c0_g1_i1_6	XP_018009476.1	2.6e-84	137/213(64.32)	320	PREDICTED: beta-1,3-galactosyltransferase 6-like [Hyalella azteca]
TRINITY_DN15364_c0_g1_i2_6	XP_009860990.2	1.1e-11	64/124(51.61)	77	sortilin-related receptor-like isoform X4 [Ciona intestinalis]
TRINITY_DN15367_c0_g1_i1_6	XP_018014847.1	8.7e-54	131/300(43.67)	218	PREDICTED: dnaJ homolog subfamily C member 17-like [Hyalella azteca]
TRINITY_DN15369_c0_g1_i1_5	XP_023320429.1	5.4e-72	152/345(44.06)	279	carbohydrate sulfotransferase 11-like [Eurytemora affinis]
TRINITY_DN15370_c0_g1_i1_5	XP_023704169.1	1.6e-70	131/303(43.23)	274	glycerol-3-phosphate phosphatase-like isoform X1 [Cryptotermes secundus]
TRINITY_DN15370_c0_g1_i2_6	XP_021931531.1	2.8e-32	135/348(38.79)	147	zinc finger protein ubi-d4 B-like isoform X2 [Zootermopsis nevadensis]
TRINITY_DN15373_c0_g1_i1_5	XP_023316787.1	1.2e-26	57/120(47.50)	126	nephrin isoform X3 [Trichogramma pretiosum]
TRINITY_DN15373_c0_g2_i1_5	XP_018012290.1	2.2e-79	175/405(43.21)	303	PREDICTED: protein turtle homolog A-like [Hyalella azteca]
TRINITY_DN15375_c0_g1_i1_6	PNF26241.1	8.3e-50	118/287(41.11)	206	hypothetical protein B7P43_G02679 [Cryptotermes secundus]
TRINITY_DN15377_c0_g2_i5_3	XP_018028029.1	8.4e-125	230/347(66.28)	455	PREDICTED: transmembrane protein 115-like [Hyalella azteca]
TRINITY_DN1537_c0_g1_i1_2	XP_017575162.1	6.8e-28	73/203(35.96)	132	PREDICTED: BAG family molecular chaperone regulator 1 [Pygocentrus nattereri]
TRINITY_DN15380_c0_g1_i1_5	XP_004661610.1	4.1e-146	269/554(48.56)	526	PREDICTED: conserved oligomeric Golgi complex subunit 8 [Jaculus jaculus]
TRINITY_DN15380_c0_g1_i1_8	XP_018561321.1	3.9e-137	248/583(42.54)	496	2',5'-phosphodiesterase 12 [Anoplophora glabripennis]
TRINITY_DN15381_c0_g1_i2_6	AKN79741.1	3.2e-71	122/237(51.48)	276	cytochrome P450, partial [Procambarus clarkii]
TRINITY_DN15383_c0_g1_i1_3	AWU67113.1	3.9e-35	69/112(61.61)	156	putative triacylglycerol lipase [Crangon crangon]
TRINITY_DN15383_c0_g1_i1_6	PNF39181.1	1.5e-13	47/95(49.47)	83	Juxtaposed with another zinc finger protein 1 [Cryptotermes secundus]
TRINITY_DN15383_c0_g2_i1_3	AWU67113.1	6.8e-68	115/205(56.10)	265	putative triacylglycerol lipase [Crangon crangon]
TRINITY_DN15383_c0_g2_i1_6	PSN30636.1	1.9e-22	61/158(38.61)	114	hypothetical protein C0J52_16863 [Blattella germanica]
TRINITY_DN15384_c0_g2_i1_6	XP_018799250.1	7.3e-23	56/103(54.37)	114	PREDICTED: uncharacterized protein LOC108975315, partial [Bactrocera latifrons]
TRINITY_DN15391_c0_g1_i1_7	XP_026181627.1	1.5e-06	25/59(42.37)	61	meteorin-like protein [Mastacembelus armatus]
TRINITY_DN15391_c0_g1_i5_3	XP_018022372.1	6.1e-10	57/211(27.01)	73	PREDICTED: uncharacterized protein LOC108678461 [Hyalella azteca]
TRINITY_DN15392_c0_g1_i1_5	XP_015607497.1	2.6e-40	98/199(49.25)	173	INO80 complex subunit B isoform X2 [Cephus cinctus]
TRINITY_DN15396_c0_g2_i1_6	EEB16051.1	1.4e-45	88/124(70.97)	190	unc-13, putative, partial [Pediculus humanus corporis]
TRINITY_DN15398_c0_g1_i1_3	XP_018025629.1	4.9e-115	219/407(53.81)	422	PREDICTED: neural-cadherin-like [Hyalella azteca]
TRINITY_DN15398_c0_g1_i1_6	XP_023218766.1	8.6e-85	216/629(34.34)	322	coiled-coil domain-containing protein 22 homolog [Centruroides sculpturatus]
TRINITY_DN15398_c0_g2_i1_3	XP_018025629.1	1.9e-16	44/74(59.46)	94	PREDICTED: neural-cadherin-like [Hyalella azteca]
TRINITY_DN15398_c0_g3_i1_3	XP_018025629.1	5.6e-51	100/231(43.29)	208	PREDICTED: neural-cadherin-like [Hyalella azteca]
TRINITY_DN15403_c0_g1_i1_3	XP_022252010.1	1.7e-47	101/199(50.75)	198	major facilitator superfamily domain-containing protein 9-like isoform X1 [Limulus polyphemus]
TRINITY_DN15403_c0_g1_i1_6	PSN48184.1	2.6e-43	92/119(77.31)	183	KxDL motif-containing protein [Blattella germanica]
TRINITY_DN15403_c0_g1_i1_7	XP_009050326.1	6.7e-10	30/38(78.95)	71	hypothetical protein LOTGIDRAFT_76953, partial [Lottia gigantea]
TRINITY_DN15405_c0_g1_i1_1	XP_018012250.1	7.3e-28	86/244(35.25)	131	PREDICTED: putative nuclease HARBI1 [Hyalella azteca]
TRINITY_DN15406_c0_g1_i1_5	XP_018017331.1	1.6e-80	149/243(61.32)	307	PREDICTED: muscle, skeletal receptor tyrosine protein kinase-like isoform X1 [Hyalella azteca]
TRINITY_DN15406_c0_g1_i1_7	KDR17084.1	1.3e-188	381/536(71.08)	668	ATP-dependent Clp protease ATP-binding subunit clpX-like, mitochondrial [Zootermopsis nevadensis]
TRINITY_DN15406_c0_g1_i2_6	XP_023241200.1	1.4e-120	213/294(72.45)	440	60S ribosomal protein L5-A-like [Centruroides sculpturatus]
TRINITY_DN15407_c0_g1_i2_2	XP_018009304.1	1.4e-121	235/266(88.35)	444	PREDICTED: syntaxin-1A-like [Hyalella azteca]
TRINITY_DN15411_c0_g1_i1_6	XP_022906330.1	1.2e-20	49/113(43.36)	107	NADH dehydrogenase [ubiquinone] 1 subunit C2 [Onthophagus taurus]
TRINITY_DN15412_c0_g1_i1_5	XP_019868667.1	4.9e-09	32/98(32.65)	69	PREDICTED: uncharacterized protein LOC109597431 [Aethina tumida]
TRINITY_DN15414_c0_g1_i1_6	XP_018009639.1	6.0e-46	87/159(54.72)	192	PREDICTED: protein THEM6-like [Hyalella azteca]
TRINITY_DN15415_c0_g1_i1_6	AWU67220.1	4.4e-69	114/159(71.70)	268	putative chitinase [Crangon crangon]
TRINITY_DN15418_c0_g1_i2_3	AEB54645.1	6.6e-76	148/193(76.68)	291	ribosomal protein L9 [Procambarus clarkii]
TRINITY_DN15420_c0_g1_i1_4	BAM35674.1	1.8e-12	56/195(28.72)	80	putative reverse transcriptase [Penaeus japonicus]
TRINITY_DN15429_c0_g1_i1_3	XP_023723345.1	3.9e-95	170/278(61.15)	355	2-oxoglutarate and iron-dependent oxygenase domain-containing protein 3-like isoform X1 [Cryptotermes secundus]
TRINITY_DN15429_c0_g1_i1_7	AWU67220.1	1.9e-153	240/379(63.32)	549	putative chitinase [Crangon crangon]
TRINITY_DN1542_c0_g1_i1_1	XP_016406629.1	1.5e-34	74/155(47.74)	153	PREDICTED: myosin-IIIa-like [Sinocyclocheilus rhinocerous]
TRINITY_DN1542_c0_g1_i1_6	XP_015190722.1	2.7e-17	46/108(42.59)	95	PREDICTED: uncharacterized protein LOC107074126 isoform X1 [Polistes dominula]
TRINITY_DN1543_c0_g1_i1_3	XP_022225214.1	2.6e-07	32/51(62.75)	64	putative polypeptide N-acetylgalactosaminyltransferase 9 isoform X2 [Drosophila obscura]
TRINITY_DN15448_c0_g1_i1_7	XP_018027616.1	2.1e-104	182/273(66.67)	387	PREDICTED: 1-acyl-sn-glycerol-3-phosphate acyltransferase alpha-like [Hyalella azteca]
TRINITY_DN15450_c0_g1_i1_5	XP_018022887.1	6.9e-118	198/312(63.46)	431	PREDICTED: leucine carboxyl methyltransferase 1-like [Hyalella azteca]
TRINITY_DN15451_c0_g1_i1_4	PIO34909.1	2.2e-09	31/73(42.47)	71	hypothetical protein AB205_0047290, partial [Rana catesbeiana]
TRINITY_DN15453_c0_g1_i1_4	XP_018007863.1	5.9e-15	50/127(39.37)	89	PREDICTED: uncharacterized protein LOC108665598 [Hyalella azteca]
TRINITY_DN15453_c0_g1_i2_6	PNF24207.1	5.4e-27	69/104(66.35)	128	hypothetical protein B7P43_G16041 [Cryptotermes secundus]
TRINITY_DN15456_c0_g1_i1_1	XP_018014762.1	7.1e-42	96/187(51.34)	179	PREDICTED: succinate dehydrogenase [ubiquinone] cytochrome b small subunit, mitochondrial-like [Hyalella azteca]
TRINITY_DN15456_c0_g1_i1_3	PNF17707.1	1.2e-190	404/729(55.42)	674	Rho GTPase-activating protein 100F, partial [Cryptotermes secundus]
TRINITY_DN15457_c0_g1_i1_2	XP_018019948.1	1.0e-105	198/225(88.00)	390	PREDICTED: intraflagellar transport protein 56-like [Hyalella azteca]
TRINITY_DN15461_c0_g1_i1_8	XP_018024523.1	1.4e-10	32/75(42.67)	75	PREDICTED: histone-lysine N-methyltransferase 2C-like [Hyalella azteca]
TRINITY_DN15461_c0_g2_i1_4	XP_018012681.1	2.3e-25	86/213(40.38)	123	PREDICTED: zinc finger protein GLI2-like [Hyalella azteca]
TRINITY_DN15461_c1_g1_i1_4	ESO86629.1	1.9e-22	48/53(90.57)	114	hypothetical protein LOTGIDRAFT_55425, partial [Lottia gigantea]
TRINITY_DN15462_c0_g1_i1_3	XP_009055838.1	1.0e-18	57/138(41.30)	101	hypothetical protein LOTGIDRAFT_175538 [Lottia gigantea]
TRINITY_DN15462_c0_g1_i1_7	XP_014238768.1	1.6e-21	46/84(54.76)	110	E3 ubiquitin-protein ligase RNF14-like isoform X2 [Trichogramma pretiosum]
TRINITY_DN15464_c0_g1_i2_8	XP_018021839.1	2.1e-112	209/509(41.06)	414	PREDICTED: protein msta-like [Hyalella azteca]
TRINITY_DN15467_c0_g1_i1_3	XP_018009496.1	1.4e-190	296/528(56.06)	673	PREDICTED: sphingomyelin phosphodiesterase-like [Hyalella azteca]
TRINITY_DN15473_c0_g1_i2_6	XP_018023516.1	1.9e-41	110/160(68.75)	176	PREDICTED: chromatin complexes subunit BAP18-like isoform X1 [Hyalella azteca]
TRINITY_DN15476_c0_g1_i2_6	KYN34880.1	9.3e-55	105/181(58.01)	221	Phosphomevalonate kinase [Trachymyrmex septentrionalis]
TRINITY_DN15482_c0_g1_i1_1	OMJ95252.1	1.9e-07	33/112(29.46)	64	hypothetical protein SteCoe_1467 [Stentor coeruleus]
TRINITY_DN15484_c0_g1_i2_4	XP_022319340.1	1.2e-57	113/264(42.80)	231	SPRY domain-containing SOCS box protein 3-like [Crassostrea virginica]
TRINITY_DN15492_c0_g1_i2_3	KFM57900.1	2.2e-57	103/186(55.38)	229	Phosphatidylethanolamine-binding protein 1, partial [Stegodyphus mimosarum]
TRINITY_DN15506_c0_g1_i1_2	XP_021355212.1	2.5e-35	75/157(47.77)	156	uncharacterized protein LOC110451492 [Mizuhopecten yessoensis]
TRINITY_DN15506_c0_g1_i3_6	XP_018020604.1	2.6e-45	90/98(91.84)	191	PREDICTED: serine/arginine-rich splicing factor 2-like [Hyalella azteca]
TRINITY_DN15506_c0_g2_i1_2	XP_021363608.1	1.3e-11	46/114(40.35)	76	uncharacterized protein LOC110456894 [Mizuhopecten yessoensis]
TRINITY_DN15510_c0_g1_i1_8	XP_018008985.1	4.6e-55	109/121(90.08)	223	PREDICTED: uncharacterized protein LOC108666589 [Hyalella azteca]
TRINITY_DN15511_c0_g1_i1_1	XP_018028012.1	2.5e-110	232/557(41.65)	407	PREDICTED: zinc finger protein 91-like [Hyalella azteca]
TRINITY_DN15516_c0_g1_i1_3	XP_023716518.1	1.3e-254	437/507(86.19)	887	calcium/calmodulin-dependent protein kinase type II alpha chain isoform X11 [Cryptotermes secundus]
TRINITY_DN15516_c0_g1_i1_5	KHN88744.1	3.9e-07	28/65(43.08)	62	hypothetical protein Tcan_00570, partial [Toxocara canis]
TRINITY_DN15517_c0_g1_i1_7	XP_018024031.1	2.3e-119	212/348(60.92)	438	PREDICTED: protein arginine N-methyltransferase 6-like isoform X1 [Hyalella azteca]
TRINITY_DN15518_c0_g1_i1_7	XP_018010624.1	2.0e-09	30/77(38.96)	71	PREDICTED: collagen alpha-1(I) chain-like, partial [Hyalella azteca]
TRINITY_DN1551_c0_g1_i1_2	XP_026285325.1	2.4e-60	124/232(53.45)	239	cadherin-23 [Frankliniella occidentalis]
TRINITY_DN15521_c0_g1_i1_6	XP_018020559.1	3.2e-33	77/184(41.85)	149	PREDICTED: vitelline membrane outer layer protein 1 homolog [Hyalella azteca]
TRINITY_DN15522_c0_g1_i1_5	XP_018015467.1	1.5e-32	74/159(46.54)	147	PREDICTED: uncharacterized protein LOC108672335, partial [Hyalella azteca]
TRINITY_DN15526_c0_g1_i1_6	XP_023703707.1	1.4e-174	353/663(53.24)	621	WD repeat-containing protein 20 [Cryptotermes secundus]
TRINITY_DN15531_c0_g1_i1_6	XP_022782087.1	5.1e-22	78/251(31.08)	112	leucine-rich repeat-containing protein 42-like [Stylophora pistillata]
TRINITY_DN15538_c0_g1_i1_3	XP_014246984.1	1.5e-78	146/338(43.20)	300	cathepsin L-like [Cimex lectularius]
TRINITY_DN15544_c0_g1_i1_2	XP_018017683.1	6.1e-25	84/186(45.16)	122	PREDICTED: uncharacterized protein LOC108674257 [Hyalella azteca]
TRINITY_DN15544_c0_g2_i1_2	XP_018017683.1	1.6e-32	133/297(44.78)	147	PREDICTED: uncharacterized protein LOC108674257 [Hyalella azteca]
TRINITY_DN15548_c0_g1_i1_3	XP_021350369.1	2.0e-11	48/145(33.10)	77	uncharacterized protein LOC110448443 [Mizuhopecten yessoensis]
TRINITY_DN15548_c1_g1_i2_5	XP_022188757.1	1.6e-12	59/179(32.96)	80	protein ALP1-like [Nilaparvata lugens]
TRINITY_DN1554_c0_g1_i1_6	XP_020608821.1	4.2e-21	57/149(38.26)	108	uncharacterized protein LOC110047415 [Orbicella faveolata]
TRINITY_DN15552_c0_g1_i1_8	XP_019767252.1	1.2e-79	154/373(41.29)	304	PREDICTED: pentatricopeptide repeat-containing protein 2, mitochondrial-like [Dendroctonus ponderosae]
TRINITY_DN15553_c0_g1_i1_6	XP_024120008.1	6.0e-13	38/65(58.46)	81	zinc finger MYM-type protein 1-like isoform X4 [Oryzias melastigma]
TRINITY_DN15559_c0_g1_i1_5	XP_026286998.1	6.2e-67	160/428(37.38)	263	beclin 1-associated autophagy-related key regulator [Frankliniella occidentalis]
TRINITY_DN15569_c0_g1_i1_6	XP_018021763.1	2.6e-38	134/448(29.91)	167	PREDICTED: uncharacterized protein LOC108677955 [Hyalella azteca]
TRINITY_DN15572_c0_g1_i2_6	XP_022194636.1	3.1e-25	77/188(40.96)	123	ankyrin repeat domain-containing protein 40-like [Nilaparvata lugens]
TRINITY_DN15576_c0_g1_i1_6	XP_018013643.1	5.8e-101	186/341(54.55)	375	PREDICTED: tectonin beta-propeller repeat-containing protein-like [Hyalella azteca]
TRINITY_DN15576_c0_g1_i3_3	XP_018026071.1	8.2e-73	152/262(58.02)	283	PREDICTED: uncharacterized protein LOC108681538 [Hyalella azteca]
TRINITY_DN15576_c0_g2_i1_6	XP_023718359.1	1.1e-139	382/1107(34.51)	505	tectonin beta-propeller repeat-containing protein isoform X2 [Cryptotermes secundus]
TRINITY_DN15581_c0_g1_i1_6	XP_018012068.1	8.9e-72	155/202(76.73)	278	PREDICTED: charged multivesicular body protein 1b-2-like [Hyalella azteca]
TRINITY_DN15582_c0_g2_i1_6	OZF93635.1	2.2e-13	41/129(31.78)	82	hypothetical protein FL82_10730, partial [Caenorhabditis remanei]
TRINITY_DN15584_c0_g1_i1_6	XP_018016466.1	2.3e-40	96/250(38.40)	174	PREDICTED: uncharacterized protein LOC108673189 [Hyalella azteca]
TRINITY_DN15587_c0_g1_i1_5	XP_022328400.1	7.7e-164	275/409(67.24)	584	multifunctional protein ADE2-like [Crassostrea virginica]
TRINITY_DN15588_c0_g1_i1_1	ODN05349.1	6.8e-143	260/363(71.63)	515	60S ribosomal protein L4 [Orchesella cincta]
TRINITY_DN15590_c0_g2_i1_6	EYB89509.1	1.8e-06	41/112(36.61)	61	hypothetical protein Y032_0231g3015 [Ancylostoma ceylanicum]
TRINITY_DN15591_c0_g1_i1_6	XP_018019816.1	7.9e-236	377/609(61.90)	823	PREDICTED: aminopeptidase N-like [Hyalella azteca]
TRINITY_DN15593_c0_g1_i3_6	AEB54650.1	1.0e-91	176/191(92.15)	344	ribosomal protein S7 [Procambarus clarkii]
TRINITY_DN15596_c0_g1_i1_4	XP_026287575.1	1.5e-138	260/425(61.18)	500	probable ATP-dependent RNA helicase DDX49 [Frankliniella occidentalis]
TRINITY_DN15597_c0_g1_i1_7	EDW83996.1	8.0e-56	114/199(57.29)	224	uncharacterized protein Dwil_GK13384 [Drosophila willistoni]
TRINITY_DN15598_c0_g1_i1_5	ETN61662.1	7.5e-08	32/61(52.46)	64	26S proteasome complex subunit DSS1 [Anopheles darlingi]
TRINITY_DN15598_c0_g1_i1_6	XP_018563506.1	4.3e-64	137/323(42.41)	253	roundabout homolog 2-like [Anoplophora glabripennis]
TRINITY_DN155_c0_g1_i1_3	XP_025835119.1	1.1e-12	33/50(66.00)	80	uncharacterized protein LOC108738253 isoform X1 [Agrilus planipennis]
TRINITY_DN15600_c0_g1_i1_8	XP_026763302.1	4.5e-27	53/90(58.89)	129	uncharacterized protein LOC113521846 [Galleria mellonella]
TRINITY_DN15601_c0_g1_i1_1	AWU67113.1	1.3e-122	199/330(60.30)	447	putative triacylglycerol lipase [Crangon crangon]
TRINITY_DN15601_c0_g2_i1_3	XP_021954419.1	2.5e-14	61/181(33.70)	86	allatostatin-A receptor-like [Folsomia candida]
TRINITY_DN15602_c0_g1_i2_4	KZS21507.1	1.5e-37	78/145(53.79)	165	Uncharacterized protein APZ42_011480 [Daphnia magna]
TRINITY_DN15605_c0_g1_i1_6	XP_018008896.1	2.7e-127	211/465(45.38)	463	PREDICTED: uncharacterized protein LOC108666520 isoform X1 [Hyalella azteca]
TRINITY_DN15607_c0_g1_i1_6	XP_018015723.1	8.8e-141	248/413(60.05)	507	PREDICTED: copine-8-like [Hyalella azteca]
TRINITY_DN15607_c0_g3_i1_6	XP_018015723.1	2.3e-48	89/120(74.17)	199	PREDICTED: copine-8-like [Hyalella azteca]
TRINITY_DN15607_c1_g1_i1_2	XP_019555015.1	1.1e-36	70/128(54.69)	161	PREDICTED: uncharacterized protein LOC109424370 [Aedes albopictus]
TRINITY_DN15610_c0_g1_i1_3	AEB54634.1	4.0e-16	42/62(67.74)	92	receptor accessory protein 5 [Procambarus clarkii]
TRINITY_DN15612_c0_g1_i1_1	XP_014251761.1	5.5e-308	556/799(69.59)	1064	ribosomal protein S6 kinase alpha-5-like isoform X1 [Cimex lectularius]
TRINITY_DN15612_c0_g1_i1_6	AOG14387.1	2.7e-73	130/148(87.84)	282	histamine receptor type 3 [Homarus americanus]
TRINITY_DN15612_c0_g2_i1_6	AOG14387.1	5.5e-71	144/193(74.61)	275	histamine receptor type 3 [Homarus americanus]
TRINITY_DN15614_c0_g1_i1_4	XP_021933769.1	9.4e-38	80/160(50.00)	164	transmembrane protein 72 isoform X2 [Zootermopsis nevadensis]
TRINITY_DN15616_c0_g3_i1_5	EFN64217.1	6.4e-16	44/88(50.00)	90	THAP domain-containing protein 9, partial [Camponotus floridanus]
TRINITY_DN15621_c0_g1_i1_3	XP_018014971.1	6.4e-24	84/313(26.84)	120	PREDICTED: zinc finger protein 699-like [Hyalella azteca]
TRINITY_DN15622_c0_g1_i1_3	XP_018007774.1	3.0e-249	391/578(67.65)	868	PREDICTED: leishmanolysin-like peptidase [Hyalella azteca]
TRINITY_DN15622_c0_g1_i7_5	XP_021930495.1	2.7e-28	85/254(33.46)	134	uncharacterized protein LOC110835002 isoform X1 [Zootermopsis nevadensis]
TRINITY_DN15623_c0_g1_i1_3	AGC54451.1	7.2e-19	47/129(36.43)	101	antiviral protein [Penaeus vannamei]
TRINITY_DN15626_c0_g1_i1_6	XP_018015382.1	1.5e-20	58/123(47.15)	107	PREDICTED: major facilitator superfamily domain-containing protein 8-like [Hyalella azteca]
TRINITY_DN15630_c0_g1_i1_6	XP_021916825.1	7.2e-53	111/175(63.43)	216	RNA-binding protein 42-like [Zootermopsis nevadensis]
TRINITY_DN15634_c0_g2_i1_5	APA05127.1	7.0e-38	93/238(39.08)	165	polephole-like protein [Penaeus vannamei]
TRINITY_DN1563_c0_g1_i1_8	XP_018012268.1	4.3e-08	53/123(43.09)	65	PREDICTED: dystrophin-like [Hyalella azteca]
TRINITY_DN15642_c0_g1_i1_3	XP_018023090.1	1.1e-95	209/563(37.12)	358	PREDICTED: uncharacterized protein LOC108679078 [Hyalella azteca]
TRINITY_DN15642_c0_g1_i1_6	XP_019628711.1	2.3e-64	149/371(40.16)	253	PREDICTED: uncharacterized protein LOC109473277 [Branchiostoma belcheri]
TRINITY_DN15643_c0_g1_i1_8	XP_021172547.1	5.0e-77	138/213(64.79)	295	period circadian protein homolog 2-like [Fundulus heteroclitus]
TRINITY_DN15646_c0_g2_i1_6	KZS17140.1	2.3e-14	42/114(36.84)	87	Centrosome-associated Zinc finger protein CP190 [Daphnia magna]
TRINITY_DN1564_c0_g1_i1_8	XP_013394268.1	6.6e-18	48/102(47.06)	97	stomatin-like protein 1 isoform X2 [Lingula anatina]
TRINITY_DN15651_c0_g1_i1_5	XP_008483690.1	5.6e-09	43/101(42.57)	68	uncharacterized protein LOC103520380 [Diaphorina citri]
TRINITY_DN15654_c0_g1_i1_3	XP_023720622.1	1.2e-206	386/637(60.60)	728	ran-binding protein 9 isoform X1 [Cryptotermes secundus]
TRINITY_DN15658_c0_g1_i1_6	XP_018013038.1	2.2e-51	105/155(67.74)	210	PREDICTED: actin-related protein 2/3 complex subunit 5-like [Hyalella azteca]
TRINITY_DN15659_c0_g1_i1_4	XP_018021683.1	5.6e-30	61/118(51.69)	140	PREDICTED: putative uncharacterized protein DDB_G0277255 [Hyalella azteca]
TRINITY_DN15660_c0_g1_i1_3	XP_018007530.1	1.3e-33	101/285(35.44)	152	PREDICTED: uncharacterized protein LOC108665303 [Hyalella azteca]
TRINITY_DN15662_c0_g1_i1_4	XP_022188436.1	2.6e-09	38/69(55.07)	72	uncharacterized protein LOC111047074 isoform X2 [Nilaparvata lugens]
TRINITY_DN15662_c0_g1_i2_3	EPB66060.1	4.8e-19	76/262(29.01)	102	hypothetical protein ANCCEY_14849 [Ancylostoma ceylanicum]
TRINITY_DN15663_c0_g1_i1_4	XP_018020290.1	1.4e-177	476/1295(36.76)	631	PREDICTED: uncharacterized protein LOC108676682 [Hyalella azteca]
TRINITY_DN15664_c0_g1_i1_3	AFX93743.1	2.6e-43	93/150(62.00)	182	ferritin 1 [Ruditapes decussatus]
TRINITY_DN15664_c0_g1_i1_4	XP_018018776.1	5.7e-104	232/582(39.86)	385	PREDICTED: uncharacterized protein LOC108675288 isoform X1 [Hyalella azteca]
TRINITY_DN15665_c0_g1_i1_6	XP_012944147.1	1.5e-18	63/225(28.00)	102	PREDICTED: uncharacterized protein LOC106013315 [Aplysia californica]
TRINITY_DN15670_c0_g1_i3_2	XP_018014706.1	7.1e-202	367/521(70.44)	711	PREDICTED: histone acetyltransferase KAT5-like isoform X2 [Hyalella azteca]
TRINITY_DN15670_c0_g2_i1_4	XP_018016395.1	2.6e-36	93/233(39.91)	160	PREDICTED: uncharacterized protein LOC108673120 [Hyalella azteca]
TRINITY_DN15671_c0_g1_i1_2	XP_018017375.1	2.3e-206	351/576(60.94)	726	PREDICTED: inter-alpha-trypsin inhibitor heavy chain H4-like [Hyalella azteca]
TRINITY_DN15672_c0_g1_i1_5	XP_018027370.1	3.1e-86	297/747(39.76)	328	PREDICTED: uncharacterized protein LOC108682669 [Hyalella azteca]
TRINITY_DN15672_c0_g1_i2_3	XP_018006918.1	2.6e-83	275/471(58.39)	317	PREDICTED: homer protein homolog 2-like [Hyalella azteca]
TRINITY_DN15674_c0_g1_i1_5	XP_008483691.1	1.1e-32	76/193(39.38)	147	uncharacterized protein LOC103520381 [Diaphorina citri]
TRINITY_DN15674_c0_g1_i1_7	XP_018008051.1	1.7e-87	183/433(42.26)	332	PREDICTED: uncharacterized protein LOC108665766 [Hyalella azteca]
TRINITY_DN15676_c0_g1_i1_5	ETN61662.1	1.8e-19	49/63(77.78)	103	26S proteasome complex subunit DSS1 [Anopheles darlingi]
TRINITY_DN15676_c0_g1_i1_6	XP_013783211.1	3.9e-52	128/242(52.89)	213	UDP-N-acetylglucosamine transporter-like [Limulus polyphemus]
TRINITY_DN15676_c0_g2_i1_6	XP_018011606.1	2.1e-24	69/129(53.49)	119	PREDICTED: UDP-N-acetylglucosamine transporter-like isoform X2 [Hyalella azteca]
TRINITY_DN15677_c0_g1_i1_3	XP_018025541.1	5.3e-100	177/222(79.73)	372	PREDICTED: glutaminase liver isoform, mitochondrial-like [Hyalella azteca]
TRINITY_DN15678_c0_g1_i1_4	XP_018014907.1	1.2e-88	166/214(77.57)	334	PREDICTED: pre-mRNA-splicing factor SPF27-like [Hyalella azteca]
TRINITY_DN15678_c0_g2_i1_1	XP_018027074.1	2.4e-62	128/157(81.53)	246	PREDICTED: KH domain-containing, RNA-binding, signal transduction-associated protein 3-like [Hyalella azteca]
TRINITY_DN15679_c0_g1_i1_4	OXU30888.1	2.2e-30	70/131(53.44)	139	hypothetical protein TSAR_002609 [Trichomalopsis sarcophagae]
TRINITY_DN15681_c0_g1_i1_6	PNF25658.1	2.6e-109	189/218(86.70)	402	hypothetical protein B7P43_G00637 [Cryptotermes secundus]
TRINITY_DN15681_c0_g2_i1_6	XP_022257394.1	3.1e-38	122/338(36.09)	166	small G protein signaling modulator 1-like, partial [Limulus polyphemus]
TRINITY_DN15681_c0_g3_i1_6	XP_018018089.1	1.9e-80	195/348(56.03)	306	PREDICTED: small G protein signaling modulator 2-like [Hyalella azteca]
TRINITY_DN15684_c0_g1_i1_6	ELU08552.1	1.0e-63	124/151(82.12)	250	hypothetical protein CAPTEDRAFT_162084 [Capitella teleta]
TRINITY_DN15684_c0_g1_i2_4	XP_013784100.1	3.0e-66	127/165(76.97)	261	60S ribosomal protein L12-like [Limulus polyphemus]
TRINITY_DN15685_c0_g1_i1_8	XP_018027479.1	1.1e-91	168/271(61.99)	345	PREDICTED: tribbles homolog 2-like [Hyalella azteca]
TRINITY_DN15687_c0_g1_i1_2	XP_018014979.1	1.3e-42	106/263(40.30)	181	PREDICTED: fructose-2,6-bisphosphatase TIGAR B-like [Hyalella azteca]
TRINITY_DN15687_c0_g1_i1_3	AHH86070.1	1.8e-192	330/353(93.48)	679	Dscam, partial [Cherax quadricarinatus]
TRINITY_DN15687_c0_g1_i1_8	XP_018007126.1	4.2e-57	156/445(35.06)	229	PREDICTED: transient receptor potential channel pyrexia-like [Hyalella azteca]
TRINITY_DN15699_c0_g1_i1_3	XP_018024465.1	3.6e-29	75/187(40.11)	136	PREDICTED: uncharacterized protein LOC108680202 [Hyalella azteca]
TRINITY_DN15708_c0_g1_i1_8	XP_018012909.1	1.3e-116	191/285(67.02)	427	PREDICTED: uncharacterized protein LOC108669977 [Hyalella azteca]
TRINITY_DN15709_c0_g1_i1_6	XP_018011346.1	2.0e-72	205/477(42.98)	280	PREDICTED: diacylglycerol kinase delta-like [Hyalella azteca]
TRINITY_DN15709_c0_g2_i1_6	XP_018011346.1	3.3e-12	69/150(46.00)	80	PREDICTED: diacylglycerol kinase delta-like [Hyalella azteca]
TRINITY_DN15709_c0_g3_i1_6	XP_018011346.1	1.5e-100	208/377(55.17)	374	PREDICTED: diacylglycerol kinase delta-like [Hyalella azteca]
TRINITY_DN15715_c0_g2_i2_6	AET34915.1	2.4e-06	38/93(40.86)	60	heat shock protein 21 [Macrobrachium rosenbergii]
TRINITY_DN15718_c0_g1_i1_6	EEC20154.1	1.0e-17	47/52(90.38)	97	ribosomal protein L39, putative [Ixodes scapularis]
TRINITY_DN15719_c0_g1_i1_8	EFX86991.1	2.8e-123	264/710(37.18)	450	hypothetical protein DAPPUDRAFT_97204 [Daphnia pulex]
TRINITY_DN15727_c0_g2_i2_8	XP_022688969.1	1.1e-98	172/202(85.15)	367	RNA-binding protein Musashi homolog Rbp6-like isoform X4 [Varroa jacobsoni]
TRINITY_DN15735_c0_g1_i1_6	PNF24678.1	8.1e-75	142/178(79.78)	288	hypothetical protein B7P43_G17554 [Cryptotermes secundus]
TRINITY_DN15736_c0_g1_i1_2	XP_018009822.1	9.5e-135	300/681(44.05)	488	PREDICTED: G patch domain-containing protein 1-like [Hyalella azteca]
TRINITY_DN15738_c0_g1_i1_8	XP_019575845.1	4.6e-91	161/182(88.46)	341	PREDICTED: glycine dehydrogenase (decarboxylating) 1, mitochondrial, partial [Rhinolophus sinicus]
TRINITY_DN15738_c0_g1_i2_5	XP_018016490.1	4.8e-105	194/219(88.58)	389	PREDICTED: ras-related protein Rab-30-like isoform X2 [Hyalella azteca]
TRINITY_DN15739_c0_g1_i1_6	XP_018015944.1	2.5e-101	174/266(65.41)	377	PREDICTED: uncharacterized protein LOC108672734 isoform X1 [Hyalella azteca]
TRINITY_DN15740_c0_g1_i2_8	XP_018019451.1	3.6e-94	182/301(60.47)	352	PREDICTED: uncharacterized protein LOC108675908 [Hyalella azteca]
TRINITY_DN15740_c0_g3_i1_8	XP_018019451.1	5.2e-10	78/206(37.86)	72	PREDICTED: uncharacterized protein LOC108675908 [Hyalella azteca]
[truncated: 15,661 more rows]
